# Supplementary material for: Theoretical insight on ethylene polymerization catalyzed by carborane-containing metal complexes: the role of carborane
Source: Royal Society of Chemistry journal article supplement (doi:10.1039/c8dt03483d), 2018-01-01
Supplement: c8dt03483d1.pdf [file c8dt03483d1.pdf]

## Electronic Supplementary Information

### **A Theoretical Insight on Ethylene Polymerization Catalyzed by Carborane-Containing Metal Complexes: the Role of Carborane**

Nana Ma, Changgeng Wei, Shujun Li\*, and Guisheng Zhang\*

School of Chemistry and Chemical Engineering, Henan Key laboratory of Organic Functional Molecule and Drug Innovation, Henan Key Laboratory of Boron Chemistry and Advanced Energy Materials, Henan Normal University, Xinxiang, Henan, 453007, China.

E-mail: lisj@htu.edu.cn; zgs6668@yahoo.com

### **Detailed illustration about corrected Gibbs activation energies ( $\Delta G^{\ddagger}$ )**

For the bimolecular reactions, it is difficult to accurately estimate the activation entropy because it is a solution-based reaction, we corrected the activation Gibbs free energy ( $\Delta G^{\ddagger}$ , kcal/mol at 298 K) based on the free volume theory. This provides a rate of a solution based bimolecular reaction that is about 80 times faster than the corresponding reaction in the gas phase. This means that the activation free energy for solution reaction should be about 2.8 kcal/mol smaller than the value calculated in the gas phase.

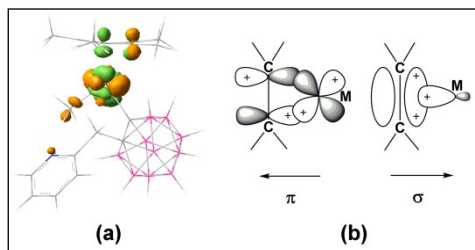

**Fig. S1** (a) Fukui dual descriptors of **1M**; (b) **C<sub>2</sub>H<sub>4</sub>** interact with metal.

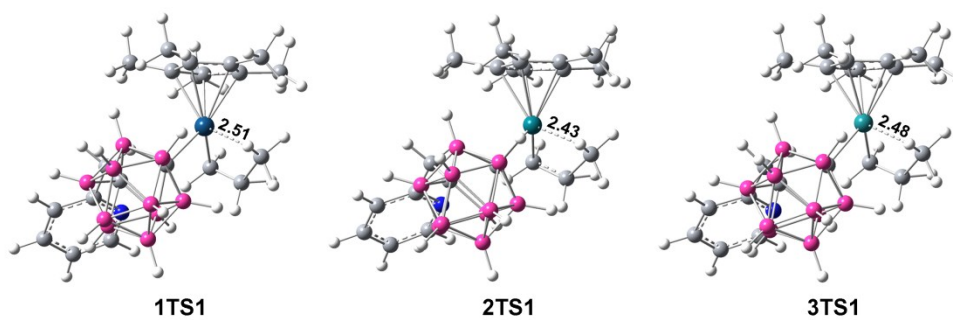

**Fig. S2** The Ir...H<sub>α</sub> distances of transition states for the **1V**(Ir<sup>III</sup>), **2V**(Rh<sup>III</sup>) and **3V**(Ru<sup>II</sup>).

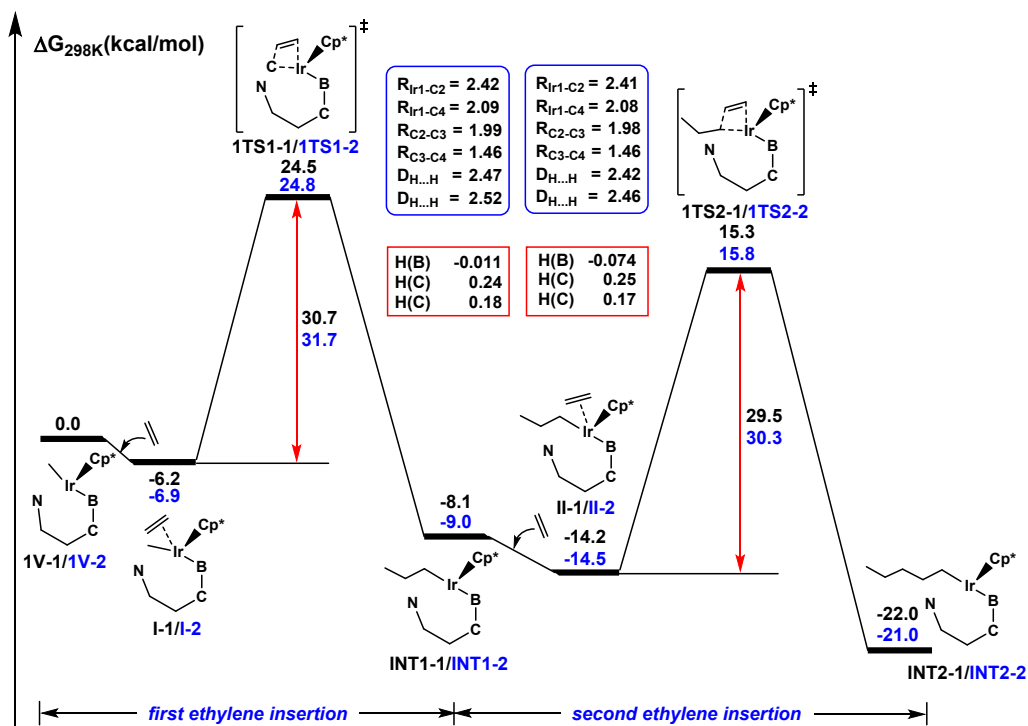

**Fig. S3** Energy profile of the ethylene insertion step in the polymerization process catalyzed by the **1V-1** and **1V-2**.

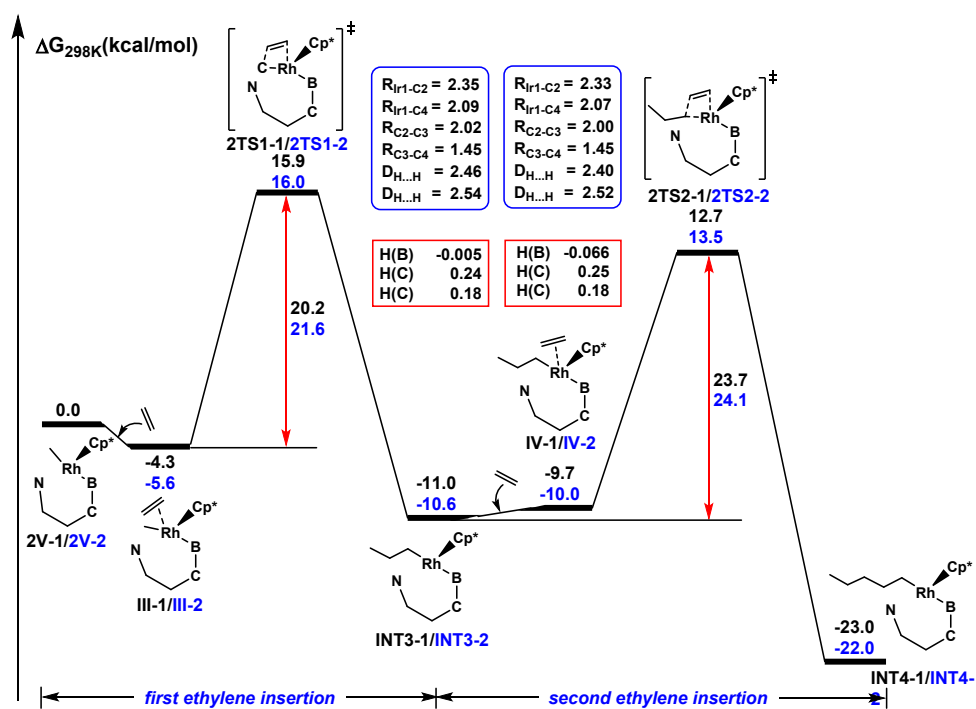

**Fig. S4** Energy profile of the ethylene insertion step in the polymerization process catalyzed by the **2V-1** and **2V-2**.

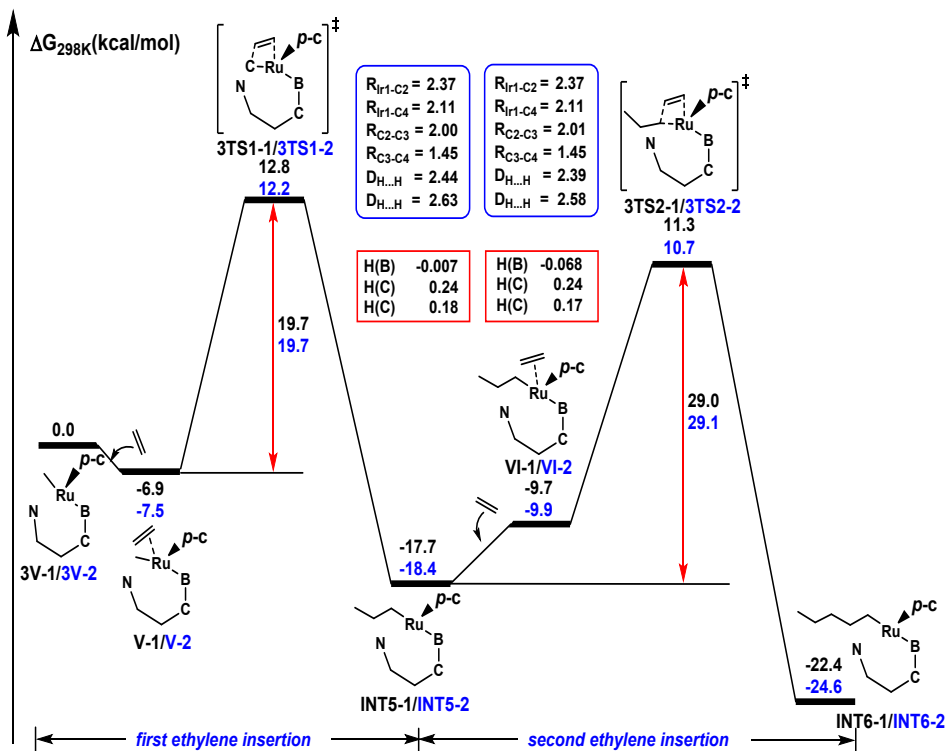

**Fig. S5** Energy profile of the ethylene insertion step in the polymerization process catalyzed by the **3V-1** and **3V-2**.

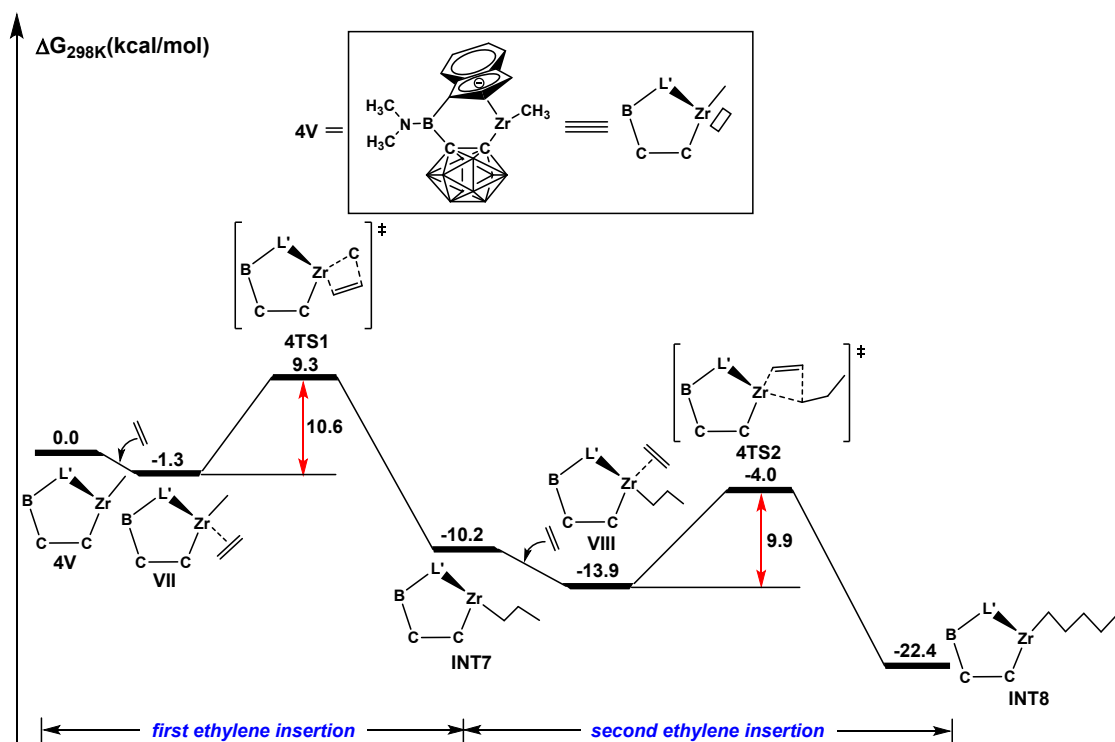

**Fig. S6** Energy profile of the ethylene insertion step in the polymerization process catalyzed by the **4V**.

**Table S1.** charge decomposition analysis (CDA) of  $\pi$ -complex and translate state for the first ethylene insertion step.

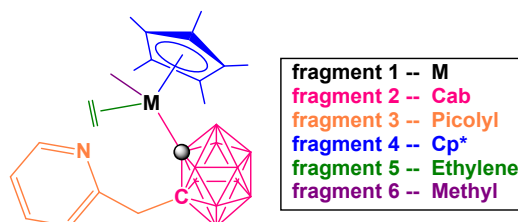

| Ir-CCB <sub>10</sub> /π-complex I |          |           |           |           | Ir-CCB <sub>10</sub> /1TS1 |           |           |           |
|-----------------------------------|----------|-----------|-----------|-----------|----------------------------|-----------|-----------|-----------|
|                                   | d        | b         | d-b       | r         | d                          | b         | d-b       | r         |
| 1-2                               | 0.004574 | 0.191086  | -0.186512 | 0.004667  | 0.003809                   | 0.197680  | -0.193871 | -0.018047 |
| 1-3                               | 0.001750 | 0.011001  | -0.009251 | -0.001874 | 0.001792                   | 0.014364  | -0.012572 | -0.002171 |
| 1-4                               | 0.037893 | 0.340601  | -0.302708 | -0.026330 | 0.040567                   | 0.319276  | -0.278708 | -0.064304 |
| 1-5                               | 0.040857 | 0.198527  | -0.157670 | -0.049068 | 0.040512                   | 0.146105  | -0.105593 | -0.009733 |
| 1-6                               | 0.005709 | 0.238051  | -0.232343 | 0.058173  | 0.004349                   | 0.137946  | -0.133597 | -0.000865 |
| 2-3                               | 0.238183 | 0.017055  | 0.221128  | -0.276255 | 0.238699                   | 0.018907  | 0.219792  | -0.272726 |
| 2-4                               | 0.013980 | 0.013026  | 0.000954  | -0.047726 | 0.019621                   | 0.016580  | 0.003041  | -0.066620 |
| 2-5                               | 0.015781 | 0.007567  | 0.008214  | -0.095271 | 0.014835                   | 0.006675  | 0.008160  | -0.088858 |
| 2-6                               | 0.023722 | 0.007611  | 0.016111  | -0.110376 | 0.012606                   | 0.002930  | 0.009676  | -0.061572 |
| 3-4                               | 0.004938 | 0.006583  | -0.001645 | -0.020246 | 0.002221                   | 0.003174  | -0.000953 | -0.010033 |
| 3-5                               | 0.018315 | 0.002708  | 0.015607  | -0.024492 | 0.017526                   | 0.002902  | 0.014624  | -0.024232 |
| 3-6                               | 0.000005 | -0.000063 | 0.000068  | -0.000037 | 0.000001                   | -0.000031 | 0.000032  | -0.000014 |
| 4-5                               | 0.017918 | 0.001505  | 0.016413  | -0.027968 | 0.015879                   | -0.000203 | 0.016083  | -0.014129 |
| 4-6                               | 0.006291 | 0.003578  | 0.002713  | -0.039745 | 0.009141                   | 0.007463  | 0.001678  | -0.031465 |
| 5-6                               | 0.001199 | 0.002052  | -0.000853 | -0.068815 | -0.011121                  | 0.084266  | -0.095387 | -0.154025 |

| Ir-BC <sub>2</sub> B <sub>9</sub> /π-complex I-1 |          |           |           |           | Ir-BC <sub>2</sub> B <sub>9</sub> /1TS-1 |           |           |           |
|--------------------------------------------------|----------|-----------|-----------|-----------|------------------------------------------|-----------|-----------|-----------|
|                                                  | d        | b         | d-b       | r         | d                                        | b         | d-b       | r         |
| 1-2                                              | 0.006551 | 0.091547  | -0.084996 | -0.072919 | 0.002840                                 | 0.104501  | -0.101660 | -0.116192 |
| 1-3                                              | 0.000970 | 0.008921  | -0.007951 | -0.001109 | 0.001202                                 | 0.012543  | -0.011341 | -0.001119 |
| 1-4                                              | 0.034525 | 0.320631  | -0.286106 | -0.030737 | 0.040902                                 | 0.303870  | -0.262969 | -0.075295 |
| 1-5                                              | 0.034728 | 0.205449  | -0.170721 | -0.027523 | 0.037519                                 | 0.164566  | -0.127047 | -0.000977 |
| 1-6                                              | 0.006729 | 0.243259  | -0.236530 | 0.061541  | 0.005526                                 | 0.143455  | -0.137929 | -0.003820 |
| 2-3                                              | 0.241212 | 0.027311  | 0.213902  | -0.270167 | 0.242597                                 | 0.028603  | 0.213994  | -0.267239 |
| 2-4                                              | 0.011786 | 0.020569  | -0.008783 | -0.019941 | 0.015956                                 | 0.020087  | -0.004131 | -0.032344 |
| 2-5                                              | 0.009724 | -0.000011 | 0.009735  | -0.093419 | 0.012977                                 | 0.000225  | 0.012752  | -0.088345 |
| 2-6                                              | 0.021646 | 0.003120  | 0.018526  | -0.092232 | 0.008895                                 | -0.002690 | 0.011585  | -0.048897 |
| 3-4                                              | 0.003716 | 0.006039  | -0.002323 | -0.012756 | 0.001504                                 | 0.003026  | -0.001522 | -0.006207 |
| 3-5                                              | 0.012264 | 0.003938  | 0.008326  | -0.016641 | 0.013234                                 | 0.004539  | 0.008695  | -0.018657 |
| 3-6                                              | 0.000003 | -0.000055 | 0.000058  | -0.000026 | 0.000001                                 | -0.000031 | 0.000032  | -0.000013 |
| 4-5                                              | 0.016874 | 0.000799  | 0.016076  | -0.026464 | 0.013008                                 | -0.000309 | 0.013317  | -0.013934 |
| 4-6                                              | 0.006070 | 0.004549  | 0.001521  | -0.037826 | 0.007494                                 | 0.005883  | 0.001611  | -0.024485 |
| 5-6                                              | 0.000942 | 0.002841  | -0.001899 | -0.068575 | -0.012192                                | 0.089731  | -0.101923 | -0.167997 |

| Ir-BCB <sub>10</sub> <sup>-</sup> /π-complex I-2 |          |          |           |           | Ir-BCB <sub>10</sub> <sup>-</sup> /1TS-2 |          |           |           |
|--------------------------------------------------|----------|----------|-----------|-----------|------------------------------------------|----------|-----------|-----------|
|                                                  | d        | b        | d-b       | r         | d                                        | b        | d-b       | r         |
| 1-2                                              | 0.011365 | 0.164445 | -0.153080 | -0.014296 | 0.006793                                 | 0.181433 | -0.174640 | -0.066076 |
| 1-3                                              | 0.001185 | 0.008465 | -0.007280 | -0.001387 | 0.001273                                 | 0.014120 | -0.012847 | -0.001304 |
| 1-4                                              | 0.034577 | 0.309496 | -0.274919 | -0.059226 | 0.039737                                 | 0.281138 | -0.241401 | -0.084436 |
| 1-5                                              | 0.046887 | 0.217018 | -0.170131 | -0.052389 | 0.040720                                 | 0.164027 | -0.123307 | -0.003849 |
| 1-6                                              | 0.007428 | 0.265590 | -0.258162 | 0.034911  | 0.006260                                 | 0.137034 | -0.130774 | 0.001299  |
| 2-3                                              | 0.234423 | 0.009482 | 0.224941  | -0.226253 | 0.236138                                 | 0.010448 | 0.225690  | -0.222405 |



|     |          |           |           |           |           |           |           |           |
|-----|----------|-----------|-----------|-----------|-----------|-----------|-----------|-----------|
| 2-4 | 0.021626 | 0.017530  | 0.004096  | -0.032023 | 0.027813  | 0.018152  | 0.009661  | -0.046255 |
| 2-5 | 0.017576 | -0.001300 | 0.018876  | -0.097135 | 0.020785  | -0.001746 | 0.022531  | -0.093079 |
| 2-6 | 0.026821 | -0.002607 | 0.029428  | -0.100443 | 0.011675  | -0.003269 | 0.014944  | -0.054972 |
| 3-4 | 0.005319 | 0.005534  | -0.000214 | -0.018441 | 0.002027  | 0.002667  | -0.000641 | -0.008656 |
| 3-5 | 0.010075 | 0.003022  | 0.007053  | -0.016643 | 0.011619  | 0.003367  | 0.008252  | -0.019310 |
| 3-6 | 0.000005 | -0.000071 | 0.000076  | -0.000038 | 0.000001  | -0.000038 | 0.000039  | -0.000017 |
| 4-5 | 0.015287 | 0.001102  | 0.014185  | -0.025449 | 0.011798  | -0.000736 | 0.012534  | -0.014518 |
| 4-6 | 0.005439 | 0.006152  | -0.000713 | -0.038417 | 0.006649  | 0.006511  | 0.000138  | -0.024473 |
| 5-6 | 0.000611 | 0.002430  | -0.001819 | -0.070738 | -0.013110 | 0.089933  | -0.103043 | -0.171292 |

| Rh-CCB <sub>10</sub> /π-complex III |          |           |           |           | Rh-CCB <sub>10</sub> /2TS1 |           |           |           |
|-------------------------------------|----------|-----------|-----------|-----------|----------------------------|-----------|-----------|-----------|
|                                     | d        | b         | d-b       | r         | d                          | b         | d-b       | r         |
| 1-2                                 | 0.003573 | 0.206671  | -0.203098 | 0.000462  | 0.003451                   | 0.214130  | -0.210678 | -0.015243 |
| 1-3                                 | 0.001356 | 0.013206  | -0.011850 | -0.001217 | 0.001135                   | 0.016078  | -0.014943 | -0.001104 |
| 1-4                                 | 0.024295 | 0.333922  | -0.309627 | -0.031391 | 0.022507                   | 0.330244  | -0.307737 | -0.056927 |
| 1-5                                 | 0.022095 | 0.185640  | -0.163545 | -0.040558 | 0.031572                   | 0.124821  | -0.093249 | -0.020385 |
| 1-6                                 | 0.004405 | 0.208760  | -0.204355 | 0.040564  | 0.003636                   | 0.134027  | -0.130390 | 0.001717  |
| 2-3                                 | 0.237945 | 0.015974  | 0.221972  | -0.278876 | 0.238393                   | 0.017111  | 0.221282  | -0.277043 |
| 2-4                                 | 0.015618 | 0.012835  | 0.002782  | -0.043215 | 0.020711                   | 0.016600  | 0.004112  | -0.054098 |
| 2-5                                 | 0.016126 | 0.007772  | 0.008354  | -0.071293 | 0.015634                   | 0.007108  | 0.008525  | -0.070010 |
| 2-6                                 | 0.023100 | 0.006612  | 0.016488  | -0.089452 | 0.012406                   | 0.002710  | 0.009696  | -0.055136 |
| 3-4                                 | 0.004281 | 0.006690  | -0.002409 | -0.020037 | 0.002332                   | 0.003898  | -0.001566 | -0.010819 |
| 3-5                                 | 0.020748 | 0.002743  | 0.018005  | -0.024565 | 0.019107                   | 0.003530  | 0.015577  | -0.024459 |
| 3-6                                 | 0.000003 | -0.000034 | 0.000037  | -0.000035 | 0.000000                   | -0.000016 | 0.000016  | -0.000013 |
| 4-5                                 | 0.016333 | 0.002422  | 0.013911  | -0.024998 | 0.016661                   | 0.000570  | -0.016091 | -0.013058 |
| 4-6                                 | 0.005398 | 0.004250  | 0.001147  | -0.026171 | 0.009479                   | 0.008347  | 0.001132  | -0.032174 |
| 5-6                                 | 0.001469 | 0.003487  | -0.002017 | -0.053534 | -0.010643                  | 0.074108  | -0.084751 | -0.114016 |

| Rh-BC <sub>2</sub> B <sub>9</sub> /π-complex III-1 |          |           |           |           | Rh-BC <sub>2</sub> B <sub>9</sub> /2TS1-1 |           |           |           |
|----------------------------------------------------|----------|-----------|-----------|-----------|-------------------------------------------|-----------|-----------|-----------|
|                                                    | d        | b         | d-b       | r         | d                                         | b         | d-b       | r         |
| 1-2                                                | 0.009321 | 0.173270  | -0.163949 | -0.055441 | 0.011089                                  | 0.193343  | -0.182254 | -0.066322 |
| 1-3                                                | 0.000761 | 0.014091  | -0.013330 | -0.000696 | 0.000623                                  | 0.016245  | -0.015622 | -0.000512 |
| 1-4                                                | 0.021736 | 0.325314  | -0.303578 | -0.041875 | 0.021008                                  | 0.321875  | -0.300868 | -0.071410 |
| 1-5                                                | 0.023100 | 0.192441  | -0.169341 | -0.045691 | 0.028611                                  | 0.138574  | -0.109963 | -0.020321 |
| 1-6                                                | 0.005484 | 0.229647  | -0.224162 | 0.019384  | 0.004611                                  | 0.141691  | -0.137080 | -0.003685 |
| 2-3                                                | 0.241042 | 0.027689  | 0.213353  | -0.277893 | 0.241986                                  | 0.028504  | 0.213482  | -0.275415 |
| 2-4                                                | 0.012089 | 0.019837  | -0.007747 | -0.011217 | 0.015365                                  | 0.020698  | -0.005333 | -0.010415 |
| 2-5                                                | 0.010217 | 0.004982  | 0.005235  | -0.053855 | 0.013086                                  | 0.003193  | 0.009893  | -0.055475 |
| 2-6                                                | 0.020060 | 0.003396  | 0.016663  | -0.063446 | 0.008597                                  | -0.001771 | 0.010368  | -0.041944 |
| 3-4                                                | 0.003196 | 0.007147  | -0.003951 | -0.013580 | 0.001558                                  | 0.003892  | -0.002335 | -0.007160 |
| 3-5                                                | 0.014286 | 0.003615  | 0.010671  | -0.017356 | 0.013448                                  | 0.005148  | 0.008300  | -0.018316 |
| 3-6                                                | 0.000002 | -0.000027 | 0.000030  | -0.000029 | 0.000000                                  | -0.000019 | 0.000019  | -0.000012 |
| 4-5                                                | 0.015408 | 0.001839  | 0.013568  | -0.023032 | 0.013830                                  | 0.000407  | 0.013423  | -0.012897 |
| 4-6                                                | 0.005765 | 0.005713  | 0.000052  | -0.025902 | 0.007472                                  | 0.006047  | 0.001425  | -0.023997 |
| 5-6                                                | 0.001038 | 0.003704  | -0.002666 | -0.054155 | -0.011593                                 | 0.081168  | -0.092761 | -0.129889 |

| Rh-BCB <sub>10</sub> <sup>-</sup> /π-complex III-2 |          |          |           |           | Rh-BCB <sub>10</sub> <sup>-</sup> /2TS1-2 |          |           |           |
|----------------------------------------------------|----------|----------|-----------|-----------|-------------------------------------------|----------|-----------|-----------|
|                                                    | d        | b        | d-b       | r         | d                                         | b        | d-b       | r         |
| 1-2                                                | 0.010085 | 0.196801 | -0.186716 | -0.027551 | 0.011307                                  | 0.217106 | -0.205799 | -0.042991 |
| 1-3                                                | 0.000897 | 0.013534 | -0.012637 | -0.000008 | 0.000702                                  | 0.017697 | -0.016995 | -0.000598 |
| 1-4                                                | 0.019168 | 0.309011 | -0.259843 | -0.047533 | 0.017985                                  | 0.301426 | -0.283441 | -0.069645 |
| 1-5                                                | 0.029801 | 0.196775 | -0.166974 | -0.055716 | 0.032502                                  | 0.137098 | -0.104596 | -0.024240 |
| 1-6                                                | 0.006044 | 0.239711 | -0.233668 | 0.013667  | 0.005391                                  | 0.136215 | -0.130823 | 0.000522  |
| 2-3                                                | 0.234822 | 0.009533 | 0.225289  | -0.231736 | 0.236807                                  | 0.010433 | 0.226373  | -0.229182 |
| 2-4                                                | 0.019958 | 0.015949 | 0.004009  | -0.021868 | 0.025768                                  | 0.017360 | 0.008408  | -0.023545 |

|     |          |           |           |           |           |           |           |           |
|-----|----------|-----------|-----------|-----------|-----------|-----------|-----------|-----------|
| 2-5 | 0.018232 | 0.002292  | 0.015940  | -0.059073 | 0.020664  | -0.000221 | 0.020885  | -0.058643 |
| 2-6 | 0.024668 | -0.003229 | 0.027897  | -0.068988 | 0.011289  | -0.003215 | 0.014504  | -0.046280 |
| 3-4 | 0.004681 | 0.006762  | -0.002081 | -0.018657 | 0.002097  | 0.003619  | -0.001522 | -0.009599 |
| 3-5 | 0.012843 | 0.003171  | 0.009672  | -0.017897 | 0.012029  | 0.003980  | 0.008050  | -0.018901 |
| 3-6 | 0.000003 | -0.000033 | 0.000036  | -0.000043 | 0.000000  | -0.000021 | 0.000020  | -0.000018 |
| 4-5 | 0.013604 | 0.002512  | 0.011092  | -0.021154 | 0.012369  | 0.000339  | 0.012029  | -0.013247 |
| 4-6 | 0.005287 | 0.008034  | -0.002747 | -0.027018 | 0.006811  | 0.006877  | -0.000067 | -0.023885 |
| 5-6 | 0.000734 | 0.002936  | -0.002203 | -0.054728 | -0.012566 | 0.080858  | -0.093424 | -0.129173 |

| Ru-CCB <sub>10</sub> /π-complex V |          |           |           |           | Ru-CCB <sub>10</sub> /3TS1 |           |           |           |
|-----------------------------------|----------|-----------|-----------|-----------|----------------------------|-----------|-----------|-----------|
|                                   | d        | b         | d-b       | r         | d                          | b         | d-b       | r         |
| 1-2                               | 0.005265 | 0.173987  | -0.168722 | 0.015162  | 0.003974                   | 0.188258  | -0.184284 | 0.002573  |
| 1-3                               | 0.000989 | 0.016059  | -0.015070 | -0.001610 | 0.000760                   | 0.016097  | -0.015337 | -0.001572 |
| 1-4                               | 0.039698 | 0.269700  | -0.230002 | -0.076971 | 0.079775                   | 0.281470  | -0.201695 | -0.163664 |
| 1-5                               | 0.027631 | 0.152265  | -0.124633 | -0.038405 | 0.025129                   | 0.106714  | -0.081585 | -0.021487 |
| 1-6                               | 0.004318 | 0.172233  | -0.167915 | 0.099682  | 0.002519                   | 0.145570  | -0.143051 | -0.027217 |
| 2-3                               | 0.238599 | 0.014252  | 0.224347  | -0.274246 | 0.238706                   | 0.015645  | 0.223061  | -0.277168 |
| 2-4                               | 0.012413 | 0.008783  | 0.003631  | -0.038483 | 0.016363                   | 0.011417  | 0.004946  | -0.051305 |
| 2-5                               | 0.014653 | 0.006955  | 0.007698  | -0.061637 | 0.016800                   | 0.008416  | 0.008383  | -0.066346 |
| 2-6                               | 0.020223 | 0.006905  | 0.013318  | -0.084005 | 0.013344                   | 0.003625  | 0.009719  | -0.054507 |
| 3-4                               | 0.003129 | 0.003978  | -0.000849 | -0.014064 | 0.003578                   | 0.003941  | -0.000363 | -0.013159 |
| 3-5                               | 0.017915 | 0.004361  | 0.013554  | -0.027117 | 0.013649                   | 0.003269  | 0.010380  | -0.017403 |
| 3-6                               | 0.000002 | -0.000017 | 0.000019  | -0.000036 | 0.000000                   | -0.000013 | 0.000013  | -0.000012 |
| 4-5                               | 0.011810 | 0.000347  | 0.011463  | -0.028559 | 0.013536                   | -0.001533 | 0.015069  | -0.015816 |
| 4-6                               | 0.005859 | 0.004438  | 0.001421  | -0.038602 | 0.004035                   | 0.000181  | 0.003853  | -0.026656 |
| 5-6                               | 0.001828 | 0.005672  | -0.003844 | -0.062249 | -0.010158                  | 0.080217  | -0.090976 | -0.126463 |

| Ru-BC <sub>2</sub> B <sub>9</sub> /π-complex V-1 |          |           |           |           | Ru-BC <sub>2</sub> B <sub>9</sub> /3TS1-1 |           |           |           |
|--------------------------------------------------|----------|-----------|-----------|-----------|-------------------------------------------|-----------|-----------|-----------|
|                                                  | d        | b         | d-b       | r         | d                                         | b         | d-b       | r         |
| 1-2                                              | 0.013125 | 0.163398  | -0.150273 | -0.026333 | 0.009795                                  | 0.171870  | -0.162075 | -0.056883 |
| 1-3                                              | 0.000182 | 0.013431  | -0.013249 | -0.000846 | 0.000073                                  | 0.014850  | -0.014777 | -0.000589 |
| 1-4                                              | 0.050485 | 0.230983  | -0.180499 | -0.114554 | 0.075109                                  | 0.239210  | -0.164101 | -0.162343 |
| 1-5                                              | 0.027870 | 0.149330  | -0.121460 | -0.041125 | 0.043088                                  | 0.131619  | -0.088531 | -0.045777 |
| 1-6                                              | 0.004834 | 0.183496  | -0.178661 | 0.071519  | 0.003750                                  | 0.119259  | -0.115509 | 0.025818  |
| 2-3                                              | 0.240842 | 0.024926  | 0.215196  | -0.274267 | 0.242480                                  | 0.026277  | 0.216203  | -0.276311 |
| 2-4                                              | 0.015216 | 0.079136  | -0.003920 | -0.008299 | 0.014895                                  | 0.019195  | -0.004299 | 0.002612  |
| 2-5                                              | 0.013043 | 0.005624  | 0.007419  | -0.037896 | 0.015673                                  | 0.005585  | 0.010088  | -0.052680 |
| 2-6                                              | 0.017137 | 0.005540  | 0.011597  | -0.054464 | 0.008654                                  | -0.000710 | 0.009364  | -0.033227 |
| 3-4                                              | 0.002388 | 0.004105  | -0.001716 | -0.007366 | 0.003274                                  | 0.004430  | -0.001156 | -0.009994 |
| 3-5                                              | 0.009092 | 0.006674  | 0.002418  | -0.018454 | 0.008120                                  | 0.004748  | 0.003372  | -0.011839 |
| 3-6                                              | 0.000001 | -0.000020 | 0.000022  | -0.000023 | 0.000000                                  | -0.000015 | 0.000015  | -0.000011 |
| 4-5                                              | 0.012682 | -0.001747 | 0.014429  | -0.029180 | 0.011770                                  | -0.001394 | 0.013163  | -0.015551 |
| 4-6                                              | 0.006135 | 0.004175  | 0.001960  | -0.033162 | 0.003758                                  | -0.000130 | 0.003889  | -0.022393 |
| 5-6                                              | 0.002728 | 0.007193  | -0.004465 | -0.054542 | -0.010883                                 | 0.086638  | -0.097521 | -0.139418 |

| Ru-BCB <sub>10</sub> <sup>-</sup> /π-complex V-2 |          |          |           |           | Ru-BCB <sub>10</sub> <sup>-</sup> /3TS1-2 |          |           |           |
|--------------------------------------------------|----------|----------|-----------|-----------|-------------------------------------------|----------|-----------|-----------|
|                                                  | d        | b        | d-b       | r         | d                                         | b        | d-b       | r         |
| 1-2                                              | 0.010896 | 0.192921 | -0.182025 | 0.006309  | 0.008642                                  | 0.199616 | -0.190974 | -0.033861 |
| 1-3                                              | 0.000100 | 0.013059 | -0.012960 | -0.000923 | 0.000498                                  | 0.016458 | -0.015960 | -0.001126 |
| 1-4                                              | 0.058863 | 0.205827 | -0.149664 | -0.151366 | 0.080867                                  | 0.219690 | -0.138823 | -0.188436 |
| 1-5                                              | 0.030733 | 0.143258 | -0.112525 | -0.064104 | 0.039761                                  | 0.130007 | -0.090246 | -0.040531 |
| 1-6                                              | 0.004467 | 0.190678 | -0.186211 | 0.059435  | 0.005387                                  | 0.122981 | -0.117594 | 0.015180  |
| 2-3                                              | 0.236236 | 0.008558 | 0.227678  | -0.227493 | 0.236535                                  | 0.007960 | 0.228576  | -0.229397 |
| 2-4                                              | 0.028244 | 0.016332 | 0.011912  | -0.035727 | 0.025419                                  | 0.015634 | 0.009785  | -0.008259 |
| 2-5                                              | 0.027220 | 0.004585 | 0.022635  | -0.047784 | 0.023298                                  | 0.002919 | 0.020379  | -0.054308 |

|            |          |           |           |           |           |           |           |           |
|------------|----------|-----------|-----------|-----------|-----------|-----------|-----------|-----------|
| <b>2-6</b> | 0.020302 | 0.000105  | 0.020196  | -0.062252 | 0.011542  | -0.001419 | 0.012961  | -0.037294 |
| <b>3-4</b> | 0.003456 | 0.003099  | 0.000357  | -0.009924 | 0.005379  | 0.003997  | 0.001382  | -0.014660 |
| <b>3-5</b> | 0.004271 | 0.005745  | -0.014740 | -0.015564 | 0.006956  | 0.004147  | 0.002809  | -0.012208 |
| <b>3-6</b> | 0.000002 | -0.000035 | 0.000037  | -0.000040 | 0.000000  | -0.000020 | 0.000019  | -0.000013 |
| <b>4-5</b> | 0.013021 | -0.003009 | 0.016030  | -0.031040 | 0.011289  | -0.002126 | 0.013415  | -0.018135 |
| <b>4-6</b> | 0.005288 | 0.002389  | 0.002899  | -0.026940 | 0.003680  | -0.000035 | 0.003715  | -0.022874 |
| <b>5-6</b> | 0.003909 | 0.007138  | -0.003229 | -0.045130 | -0.011357 | 0.088333  | -0.099690 | -0.142233 |

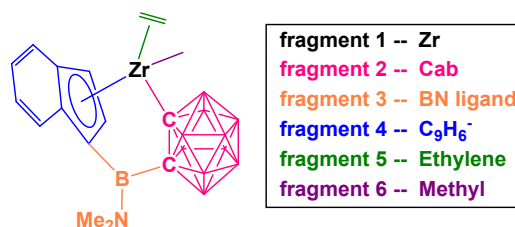

| Zr-CCB <sub>10</sub> /π-complex VII |           |           |            |           | Zr-CCB <sub>10</sub> /4TS1 |           |            |           |
|-------------------------------------|-----------|-----------|------------|-----------|----------------------------|-----------|------------|-----------|
|                                     | <b>d</b>  | <b>b</b>  | <b>d-b</b> | <b>r</b>  | <b>d</b>                   | <b>b</b>  | <b>d-b</b> | <b>r</b>  |
| <b>1-2</b>                          | -0.007712 | 0.421007  | -0.428718  | -0.141809 | -0.009329                  | 0.450989  | -0.460318  | -0.149096 |
| <b>1-3</b>                          | 0.001197  | -0.008263 | 0.009459   | 0.000202  | 0.001633                   | -0.005942 | 0.007575   | 0.000245  |
| <b>1-4</b>                          | 0.005308  | 0.353499  | -0.348191  | -0.114592 | 0.003929                   | 0.359977  | -0.356048  | -0.115756 |
| <b>1-5</b>                          | 0.003189  | 0.193095  | -0.189906  | -0.019278 | -0.005049                  | 0.192332  | -0.197381  | -0.087321 |
| <b>1-6</b>                          | -0.001840 | 0.342062  | -0.343902  | -0.172743 | -0.003381                  | 0.256796  | -0.260177  | -0.113979 |
| <b>2-3</b>                          | 0.268275  | 0.010563  | 0.257712   | 0.024633  | 0.262864                   | 0.010415  | 0.252449   | 0.024538  |
| <b>2-4</b>                          | 0.021792  | 0.012624  | 0.009169   | -0.176872 | 0.022941                   | 0.012850  | 0.010091   | -0.166067 |
| <b>2-5</b>                          | 0.001568  | -0.000023 | 0.001591   | -0.032062 | -0.002404                  | -0.001661 | -0.000743  | -0.037693 |
| <b>2-6</b>                          | 0.002963  | 0.000168  | 0.002796   | -0.005412 | -0.000105                  | 0.000318  | -0.000423  | -0.007411 |
| <b>3-4</b>                          | -0.005585 | 0.237801  | -0.243386  | 0.095703  | -0.004519                  | 0.236290  | -0.240809  | 0.083844  |
| <b>3-5</b>                          | -0.000001 | 0.000038  | -0.000039  | 0.000002  | 0.000006                   | 0.000003  | 0.000003   | -0.000001 |
| <b>3-6</b>                          | -0.000009 | 0.000188  | -0.000198  | -0.000049 | -0.000007                  | 0.000151  | -0.000158  | 0.000011  |
| <b>4-5</b>                          | 0.000528  | -0.000121 | 0.000649   | -0.011192 | 0.002726                   | -0.000893 | 0.003618   | -0.018760 |
| <b>4-6</b>                          | 0.012146  | -0.002116 | 0.014261   | -0.042625 | 0.012189                   | -0.006519 | 0.018708   | -0.044498 |
| <b>5-6</b>                          | -0.000059 | -0.001816 | 0.001756   | -0.010128 | 0.000940                   | 0.083212  | -0.082272  | -0.172309 |

### Cartesian coordinates of all the optimized structures

1 HF = -1572.2779202 hartree  
77 0.675113 -0.212684 -0.153473  
17 0.728223 0.165596 -2.584823  
6 -1.427974 -0.518838 -0.232124  
6 -2.364571 0.525492 0.678130  
5 -2.207737 -1.081849 1.214213  
1 -1.548403 -1.261347 2.179131  
5 -2.222827 -2.053396 -0.245836  
1 -1.557663 -3.030541 -0.315827  
5 -2.351914 -0.972319 -1.631754  
1 -1.778928 -1.208469 -2.636081  
5 -2.407260 0.680091 -1.027921  
1 -1.877813 1.603487 -1.533020  
5 -3.753427 -0.224031 1.348726  
1 -4.091612 0.141082 2.427910  
5 -3.697143 -1.889882 0.747331  
1 -4.108056 -2.795646 1.400139  
5 -3.799205 -1.817438 -1.030213  
1 -4.294434 -2.689978 -1.669036  
5 -3.907477 -0.106359 -1.517168  
1 -4.477122 0.266006 -2.491840  
5 -3.874942 0.871387 -0.040603  
1 -4.306692 1.968479 0.109864  
5 -4.746861 -0.676168 -0.044708  
1 -5.932816 -0.710363 0.039724  
6 -1.616529 1.565178 1.516172  
1 -2.357863 2.176445 2.036374  
1 -1.035823 1.040670 2.281789  
6 -0.695487 2.468013 0.741635  
6 -0.846604 3.855162 0.806060  
1 -1.648582 4.267632 1.409096  
6 0.013251 4.687770 0.096196  
1 -0.100235 5.766873 0.141225  
6 1.008231 4.102185 -0.681555  
1 1.697021 4.697267 -1.271589  
6 1.102762 2.716404 -0.715234  
1 1.825716 2.214794 -1.343828  
7 0.284021 1.907978 -0.007923  
6 1.308499 -2.064256 1.001693  
6 1.622671 -0.873532 1.761368  
6 2.651139 -0.146436 1.018248  
6 2.892472 -0.821251 -0.202320  
6 2.000747 -1.986919 -0.252348  
6 0.561010 -3.254616 1.517456  
1 1.251351 -3.855386 2.126405  
1 0.190537 -3.887195 0.710350  
1 -0.284642 -2.978601 2.148447  
6 1.261744 -0.624777 3.197609  
1 1.992179 -1.097645 3.869405  
1 0.277694 -1.033070 3.440769  
1 1.250890 0.444761 3.430683  
6 3.346669 1.084413 1.520300  
1 4.136797 0.807916 2.230879  
1 2.656127 1.752173 2.044200

|   |          |           |           |
|---|----------|-----------|-----------|
| 1 | 3.813261 | 1.650078  | 0.709925  |
| 6 | 3.889507 | -0.474798 | -1.265585 |
| 1 | 4.687803 | -1.227824 | -1.294821 |
| 1 | 4.357295 | 0.496919  | -1.083679 |
| 1 | 3.411393 | -0.443558 | -2.249568 |
| 6 | 2.010017 | -3.017211 | -1.341536 |
| 1 | 2.860615 | -3.702102 | -1.219696 |
| 1 | 2.087360 | -2.540063 | -2.321804 |
| 1 | 1.091647 | -3.609203 | -1.335952 |

**1M**

**HF = -1151.939489 hartree**

|    |           |           |           |
|----|-----------|-----------|-----------|
| 77 | 0.688089  | -0.167011 | -0.285336 |
| 6  | -1.406192 | -0.519272 | -0.301150 |
| 6  | -2.338302 | 0.488229  | 0.673723  |
| 5  | -2.103910 | -1.115837 | 1.181318  |
| 1  | -1.394245 | -1.282934 | 2.110413  |
| 5  | -2.163119 | -2.073611 | -0.286285 |
| 1  | -1.476287 | -3.034634 | -0.398069 |
| 5  | -2.397014 | -0.979483 | -1.646489 |
| 1  | -1.877682 | -1.182745 | -2.690147 |
| 5  | -2.474010 | 0.658774  | -1.016970 |
| 1  | -2.010792 | 1.613122  | -1.535892 |
| 5  | -3.668568 | -0.310014 | 1.402618  |
| 1  | -3.964660 | 0.030296  | 2.502045  |
| 5  | -3.591164 | -1.965831 | 0.777877  |
| 1  | -3.942138 | -2.891823 | 1.437238  |
| 5  | -3.785604 | -1.878926 | -0.990787 |
| 1  | -4.286188 | -2.758114 | -1.616582 |
| 5  | -3.971923 | -0.166294 | -1.448096 |
| 1  | -4.597941 | 0.199347  | -2.390838 |
| 5  | -3.896016 | 0.796147  | 0.037479  |
| 1  | -4.352253 | 1.878511  | 0.219776  |
| 5  | -4.717978 | -0.778602 | 0.055298  |
| 1  | -5.896665 | -0.851777 | 0.197932  |
| 6  | -1.573983 | 1.537842  | 1.483945  |
| 1  | -2.300667 | 2.123477  | 2.052458  |
| 1  | -0.938384 | 1.015742  | 2.207368  |
| 6  | -0.711684 | 2.471468  | 0.679149  |
| 6  | -0.897092 | 3.853926  | 0.764275  |
| 1  | -1.692276 | 4.237603  | 1.394891  |
| 6  | -0.076590 | 4.719034  | 0.047517  |
| 1  | -0.215731 | 5.794144  | 0.110449  |
| 6  | 0.919022  | 4.167981  | -0.755472 |
| 1  | 1.586448  | 4.788005  | -1.344718 |
| 6  | 1.045424  | 2.785799  | -0.807040 |
| 1  | 1.791337  | 2.316299  | -1.434039 |
| 7  | 0.261035  | 1.940611  | -0.103204 |
| 6  | 1.443540  | -1.925319 | 1.165071  |
| 6  | 1.992290  | -0.724853 | 1.670779  |
| 6  | 2.810055  | -0.132206 | 0.611941  |
| 6  | 2.782302  | -0.996841 | -0.518047 |
| 6  | 1.834138  | -2.065270 | -0.231535 |
| 6  | 0.699328  | -2.973377 | 1.935323  |
| 1  | 1.368486  | -3.825114 | 2.121060  |
| 1  | -0.165230 | -3.350545 | 1.384246  |
| 1  | 0.350343  | -2.607633 | 2.903413  |
| 6  | 1.889464  | -0.193915 | 3.072500  |
| 1  | 2.774743  | -0.459528 | 3.667761  |

|   |           |           |           |
|---|-----------|-----------|-----------|
| 1 | 1.014129  | -0.594328 | 3.591991  |
| 1 | 1.812588  | 0.899087  | 3.084443  |
| 6 | 3.681308  | 1.077799  | 0.796204  |
| 1 | 4.577762  | 0.823374  | 1.378000  |
| 1 | 3.160383  | 1.875279  | 1.336536  |
| 1 | 4.019158  | 1.486233  | -0.160554 |
| 6 | 3.631692  | -0.898444 | -1.750541 |
| 1 | 4.521683  | -1.533912 | -1.646845 |
| 1 | 3.978048  | 0.123595  | -1.932415 |
| 1 | 3.092379  | -1.229745 | -2.641986 |
| 6 | 1.639584  | -3.298820 | -1.067254 |
| 1 | 2.411620  | -4.051196 | -0.850037 |
| 1 | 1.694152  | -3.068048 | -2.135247 |
| 1 | 0.664504  | -3.756358 | -0.881737 |
| 6 | 0.575066  | 0.136397  | -2.370704 |
| 1 | 0.417529  | -0.818534 | -2.880790 |
| 1 | -0.240420 | 0.808116  | -2.650278 |
| 1 | 1.516492  | 0.567758  | -2.738462 |

1V

HF = -1151.9134062 hartree

|    |           |           |           |
|----|-----------|-----------|-----------|
| 77 | -1.186439 | -0.337100 | -0.312702 |
| 6  | 0.358402  | 1.117079  | -0.283905 |
| 6  | 1.921539  | 0.917049  | 0.392110  |
| 5  | 0.761838  | 1.865719  | 1.213874  |
| 1  | 0.307288  | 1.423765  | 2.214702  |
| 5  | -0.122979 | 2.748701  | -0.024083 |
| 1  | -1.278663 | 2.962980  | 0.134666  |
| 5  | 0.490568  | 2.212647  | -1.592348 |
| 1  | -0.232374 | 2.058217  | -2.522832 |
| 5  | 1.771523  | 1.026564  | -1.298618 |
| 1  | 1.962872  | 0.066829  | -1.953970 |
| 5  | 2.464691  | 2.364526  | 1.128280  |
| 1  | 3.121559  | 2.245843  | 2.111892  |
| 5  | 1.184455  | 3.555181  | 0.859760  |
| 1  | 0.954218  | 4.406977  | 1.657911  |
| 5  | 1.020347  | 3.775027  | -0.905783 |
| 1  | 0.666837  | 4.802857  | -1.389548 |
| 5  | 2.199727  | 2.698857  | -1.707192 |
| 1  | 2.699925  | 2.945859  | -2.757225 |
| 5  | 3.093885  | 1.847593  | -0.442434 |
| 1  | 4.185987  | 1.400004  | -0.541127 |
| 5  | 2.628969  | 3.540933  | -0.187553 |
| 1  | 3.456945  | 4.394106  | -0.144292 |
| 6  | 2.236417  | -0.428122 | 1.074198  |
| 1  | 2.364861  | -0.225679 | 2.141995  |
| 1  | 1.359618  | -1.069540 | 0.960639  |
| 6  | 3.448859  | -1.182711 | 0.564897  |
| 6  | 4.726937  | -0.935771 | 1.083722  |
| 1  | 4.865551  | -0.176290 | 1.847499  |
| 6  | 5.808150  | -1.668180 | 0.599433  |
| 1  | 6.808950  | -1.491873 | 0.984276  |
| 6  | 5.581027  | -2.629045 | -0.385728 |
| 1  | 6.391656  | -3.224976 | -0.794065 |
| 6  | 4.273700  | -2.810999 | -0.835761 |
| 1  | 4.050133  | -3.553874 | -1.599573 |
| 7  | 3.227861  | -2.114358 | -0.375554 |
| 6  | -3.333750 | 0.465822  | 0.110121  |
| 6  | -2.736642 | 0.342030  | 1.378184  |

S14

|   |           |           |           |
|---|-----------|-----------|-----------|
| 6 | -2.213211 | -1.017430 | 1.459569  |
| 6 | -2.737847 | -1.794843 | 0.331731  |
| 6 | -3.336182 | -0.859911 | -0.548800 |
| 6 | -3.970281 | 1.688567  | -0.475113 |
| 1 | -5.064207 | 1.621957  | -0.395633 |
| 1 | -3.723579 | 1.798151  | -1.535583 |
| 1 | -3.647179 | 2.596492  | 0.038191  |
| 6 | -2.645950 | 1.389158  | 2.446785  |
| 1 | -2.539849 | 2.392644  | 2.027480  |
| 1 | -1.794194 | 1.218367  | 3.108537  |
| 1 | -3.553166 | 1.377095  | 3.066614  |
| 6 | -1.529442 | -1.603385 | 2.657495  |
| 1 | -2.273666 | -1.902669 | 3.408978  |
| 1 | -0.854243 | -0.880482 | 3.123213  |
| 1 | -0.947757 | -2.489863 | 2.391261  |
| 6 | -2.645286 | -3.281986 | 0.172164  |
| 1 | -3.444597 | -3.779505 | 0.737740  |
| 1 | -1.688436 | -3.666647 | 0.537494  |
| 1 | -2.743024 | -3.582389 | -0.874379 |
| 6 | -4.005448 | -1.147021 | -1.859217 |
| 1 | -5.093249 | -1.226383 | -1.726874 |
| 1 | -3.650551 | -2.084308 | -2.294911 |
| 1 | -3.817162 | -0.348696 | -2.583401 |
| 6 | -0.146740 | -1.574699 | -1.597586 |
| 1 | -0.706652 | -2.495851 | -1.799094 |
| 1 | 0.862268  | -1.831565 | -1.258499 |
| 1 | -0.035968 | -1.016709 | -2.540504 |

|    |                            |           |           |
|----|----------------------------|-----------|-----------|
| I  | HF = -1230.4632448 hartree |           |           |
| 77 | -1.287602                  | -0.007177 | -0.434067 |
| 6  | 0.398448                   | 1.351443  | -0.274648 |
| 6  | 1.943177                   | 0.866213  | 0.468365  |
| 5  | 0.853082                   | 1.861118  | 1.316371  |
| 1  | 0.284230                   | 1.416603  | 2.248882  |
| 5  | 0.162585                   | 2.998651  | 0.167923  |
| 1  | -0.950374                  | 3.370160  | 0.328768  |
| 5  | 0.814755                   | 2.572950  | -1.414902 |
| 1  | 0.198805                   | 2.658091  | -2.422662 |
| 5  | 1.879192                   | 1.187676  | -1.194870 |
| 1  | 2.006585                   | 0.312922  | -1.974860 |
| 5  | 2.611566                   | 2.134145  | 1.390991  |
| 1  | 3.172234                   | 1.817328  | 2.390631  |
| 5  | 1.511654                   | 3.506301  | 1.204407  |
| 1  | 1.339525                   | 4.279687  | 2.091889  |
| 5  | 1.498662                   | 3.951249  | -0.520217 |
| 1  | 1.315350                   | 5.065719  | -0.893881 |
| 5  | 2.568385                   | 2.817404  | -1.384575 |
| 1  | 3.157127                   | 3.101754  | -2.378012 |
| 5  | 3.262574                   | 1.717012  | -0.196052 |
| 1  | 4.287117                   | 1.134164  | -0.312528 |
| 5  | 3.010457                   | 3.417266  | 0.238513  |
| 1  | 3.939330                   | 4.136941  | 0.424669  |
| 6  | 2.073905                   | -0.574653 | 0.982498  |
| 1  | 2.137285                   | -0.525536 | 2.073167  |
| 1  | 1.152749                   | -1.102677 | 0.725249  |
| 6  | 3.248252                   | -1.376578 | 0.456466  |
| 6  | 4.475871                   | -1.389833 | 1.131781  |
| 1  | 4.604523                   | -0.799872 | 2.034396  |

|   |           |           |           |
|---|-----------|-----------|-----------|
| 6 | 5.522341  | -2.154136 | 0.621400  |
| 1 | 6.484573  | -2.176662 | 1.125688  |
| 6 | 5.311736  | -2.885732 | -0.547385 |
| 1 | 6.096938  | -3.495327 | -0.984045 |
| 6 | 4.054472  | -2.817896 | -1.146336 |
| 1 | 3.845552  | -3.377059 | -2.056820 |
| 7 | 3.040666  | -2.090217 | -0.661789 |
| 6 | -3.386888 | -0.382945 | 0.452298  |
| 6 | -2.522446 | 0.085628  | 1.518810  |
| 6 | -1.583134 | -0.977857 | 1.806185  |
| 6 | -1.774395 | -2.010307 | 0.850442  |
| 6 | -2.884555 | -1.634664 | -0.013653 |
| 6 | -4.681125 | 0.253899  | 0.044042  |
| 1 | -5.480201 | -0.096961 | 0.711268  |
| 1 | -4.967731 | -0.007322 | -0.977909 |
| 1 | -4.647677 | 1.343047  | 0.116725  |
| 6 | -2.796313 | 1.275070  | 2.394070  |
| 1 | -3.184315 | 2.118732  | 1.815887  |
| 1 | -1.891156 | 1.616818  | 2.901121  |
| 1 | -3.541593 | 1.031526  | 3.164364  |
| 6 | -0.729123 | -1.082786 | 3.035150  |
| 1 | -1.338980 | -1.461661 | 3.867536  |
| 1 | -0.321576 | -0.118889 | 3.343773  |
| 1 | 0.102813  | -1.778331 | 2.900170  |
| 6 | -1.091030 | -3.347616 | 0.850110  |
| 1 | -1.598962 | -4.033843 | 1.542175  |
| 1 | -0.045667 | -3.277795 | 1.163591  |
| 1 | -1.110317 | -3.816998 | -0.137162 |
| 6 | -3.523840 | -2.518781 | -1.047033 |
| 1 | -4.193589 | -3.252253 | -0.577812 |
| 1 | -2.780538 | -3.082017 | -1.620734 |
| 1 | -4.117802 | -1.938271 | -1.758571 |
| 6 | -0.861501 | -0.380350 | -2.549318 |
| 6 | -0.162984 | -1.339707 | -1.791336 |
| 1 | -0.327508 | 0.457913  | -2.984363 |
| 1 | -1.783866 | -0.649132 | -3.058936 |
| 1 | -0.585970 | -2.335406 | -1.692673 |
| 1 | 0.909041  | -1.297989 | -1.644876 |
| 6 | -2.308555 | 1.616375  | -1.383872 |
| 1 | -2.704052 | 2.283538  | -0.613945 |
| 1 | -1.665092 | 2.193004  | -2.040525 |
| 1 | -3.134572 | 1.202631  | -1.970095 |

**1TS1**

**HF = -1230.4182879 hartree**      $v^{\ddagger} = -452.8138 \text{ icm}^{-1}$

|    |           |           |           |
|----|-----------|-----------|-----------|
| 77 | -1.224165 | -0.212082 | -0.335118 |
| 6  | 0.401250  | 1.214655  | -0.262557 |
| 6  | 1.985936  | 0.885588  | 0.449545  |
| 5  | 0.863705  | 1.846396  | 1.282986  |
| 1  | 0.382122  | 1.403102  | 2.264108  |
| 5  | 0.046913  | 2.857914  | 0.096018  |
| 1  | -1.096598 | 3.139874  | 0.255060  |
| 5  | 0.681938  | 2.399284  | -1.480229 |
| 1  | 0.011480  | 2.385452  | -2.455158 |
| 5  | 1.854031  | 1.105919  | -1.224187 |
| 1  | 2.024652  | 0.190287  | -1.948287 |
| 5  | 2.593273  | 2.251636  | 1.276855  |
| 1  | 3.208971  | 2.037264  | 2.271209  |
| 5  | 1.386211  | 3.526537  | 1.057069  |



|   |           |           |           |
|---|-----------|-----------|-----------|
| 1 | 1.185588  | 4.335310  | 1.906496  |
| 5 | 1.286512  | 3.870050  | -0.687405 |
| 1 | 1.008089  | 4.944854  | -1.115562 |
| 5 | 2.411961  | 2.769510  | -1.527496 |
| 1 | 2.946120  | 3.041069  | -2.555167 |
| 5 | 3.222933  | 1.789868  | -0.305494 |
| 1 | 4.284983  | 1.277919  | -0.422922 |
| 5 | 2.858217  | 3.492742  | 0.043832  |
| 1 | 3.735324  | 4.288479  | 0.157255  |
| 6 | 2.213210  | -0.513871 | 1.041158  |
| 1 | 2.288326  | -0.400098 | 2.126654  |
| 1 | 1.318981  | -1.105179 | 0.828640  |
| 6 | 3.427740  | -1.268680 | 0.538729  |
| 6 | 4.664444  | -1.163831 | 1.189244  |
| 1 | 4.768322  | -0.516754 | 2.055208  |
| 6 | 5.750520  | -1.888103 | 0.703877  |
| 1 | 6.719692  | -1.819685 | 1.190558  |
| 6 | 5.569781  | -2.699418 | -0.416129 |
| 1 | 6.385777  | -3.283074 | -0.831421 |
| 6 | 4.301411  | -2.746583 | -0.993676 |
| 1 | 4.114942  | -3.371118 | -1.865876 |
| 7 | 3.250357  | -2.057743 | -0.533186 |
| 6 | -3.458687 | 0.089681  | 0.556298  |
| 6 | -2.546247 | 0.349805  | 1.596051  |
| 6 | -1.690050 | -0.834377 | 1.751168  |
| 6 | -2.190437 | -1.851975 | 0.850266  |
| 6 | -3.218554 | -1.262361 | 0.052293  |
| 6 | -4.531078 | 1.003061  | 0.045628  |
| 1 | -5.525361 | 0.586259  | 0.252902  |
| 1 | -4.464481 | 1.146695  | -1.040021 |
| 1 | -4.478533 | 1.989356  | 0.512583  |
| 6 | -2.543781 | 1.548182  | 2.497934  |
| 1 | -2.984819 | 2.424149  | 2.015836  |
| 1 | -1.536456 | 1.820527  | 2.815104  |
| 1 | -3.128639 | 1.334659  | 3.403890  |
| 6 | -0.823697 | -1.117368 | 2.946210  |
| 1 | -1.446688 | -1.449718 | 3.789077  |
| 1 | -0.271620 | -0.234714 | 3.274217  |
| 1 | -0.099010 | -1.910028 | 2.741131  |
| 6 | -1.770676 | -3.293047 | 0.845972  |
| 1 | -2.319149 | -3.846310 | 1.620476  |
| 1 | -0.702349 | -3.406398 | 1.049568  |
| 1 | -1.980765 | -3.777347 | -0.111752 |
| 6 | -4.087970 | -1.967410 | -0.950063 |
| 1 | -5.007730 | -2.338331 | -0.476711 |
| 1 | -3.579300 | -2.827589 | -1.394939 |
| 1 | -4.393787 | -1.302851 | -1.764716 |
| 6 | -0.658290 | -0.663606 | -2.621725 |
| 6 | -0.128677 | -1.508435 | -1.558688 |
| 1 | 0.063105  | -0.011141 | -3.101335 |
| 1 | -1.349078 | -1.134003 | -3.317907 |
| 1 | -0.546200 | -2.515330 | -1.507708 |
| 1 | 0.948486  | -1.507761 | -1.415015 |
| 6 | -2.033498 | 0.777758  | -2.382488 |
| 1 | -2.127503 | 1.662756  | -1.753040 |
| 1 | -1.686942 | 1.131955  | -3.351439 |
| 1 | -2.986078 | 0.264714  | -2.498647 |

INT1

HF = -1230.4764875 hartree

|    |           |           |           |
|----|-----------|-----------|-----------|
| 77 | 1.097718  | -0.237552 | 0.117313  |
| 6  | -0.457973 | 1.220114  | 0.263450  |
| 6  | -1.981873 | 1.012886  | -0.501564 |
| 5  | -0.835459 | 2.057951  | -1.208876 |
| 1  | -0.317691 | 1.704905  | -2.213162 |
| 5  | -0.035249 | 2.881763  | 0.125384  |
| 1  | 1.116696  | 3.152781  | 0.042065  |
| 5  | -0.695808 | 2.233316  | 1.624428  |
| 1  | -0.002738 | 2.069638  | 2.571868  |
| 5  | -1.901901 | 1.014346  | 1.198860  |
| 1  | -2.082231 | -0.000583 | 1.770884  |
| 5  | -2.557784 | 2.486219  | -1.168617 |
| 1  | -3.169498 | 2.402273  | -2.184139 |
| 5  | -1.338101 | 3.699873  | -0.765565 |
| 1  | -1.107035 | 4.611246  | -1.494628 |
| 5  | -1.259820 | 3.808561  | 1.015070  |
| 1  | -0.968965 | 4.814774  | 1.579027  |
| 5  | -2.426346 | 2.638368  | 1.692493  |
| 1  | -2.983323 | 2.795824  | 2.731178  |
| 5  | -3.225001 | 1.835002  | 0.336001  |
| 1  | -4.299468 | 1.335755  | 0.358123  |
| 5  | -2.825371 | 3.560799  | 0.213475  |
| 1  | -3.685975 | 4.381830  | 0.188511  |
| 6  | -2.226717 | -0.294598 | -1.281436 |
| 1  | -2.508158 | -0.008359 | -2.299730 |
| 1  | -1.275012 | -0.829825 | -1.338478 |
| 6  | -3.264680 | -1.251024 | -0.728187 |
| 6  | -4.619574 | -1.126360 | -1.062833 |
| 1  | -4.947113 | -0.318274 | -1.709773 |
| 6  | -5.532021 | -2.046700 | -0.551864 |
| 1  | -6.587863 | -1.968287 | -0.796319 |
| 6  | -5.064078 | -3.067813 | 0.274456  |
| 1  | -5.736248 | -3.809052 | 0.695964  |
| 6  | -3.696799 | -3.118529 | 0.544769  |
| 1  | -3.287990 | -3.903047 | 1.179177  |
| 7  | -2.811007 | -2.241417 | 0.057259  |
| 6  | 3.170964  | 0.276797  | -0.268620 |
| 6  | 2.611998  | 0.609297  | -1.576358 |
| 6  | 1.980917  | -0.550060 | -2.050960 |
| 6  | 2.259424  | -1.660583 | -1.110642 |
| 6  | 3.105980  | -1.172018 | -0.079613 |
| 6  | 3.970800  | 1.225619  | 0.570717  |
| 1  | 5.000090  | 1.286499  | 0.189028  |
| 1  | 4.018451  | 0.899888  | 1.612474  |
| 1  | 3.543809  | 2.231828  | 0.548184  |
| 6  | 2.710093  | 1.945008  | -2.248261 |
| 1  | 2.531014  | 2.767050  | -1.550738 |
| 1  | 1.989474  | 2.042613  | -3.063453 |
| 1  | 3.714365  | 2.082446  | -2.672513 |
| 6  | 1.235376  | -0.719256 | -3.338955 |
| 1  | 1.892214  | -1.162587 | -4.100246 |
| 1  | 0.868214  | 0.234033  | -3.725368 |
| 1  | 0.378846  | -1.389712 | -3.220934 |
| 6  | 1.866076  | -3.087063 | -1.351694 |
| 1  | 2.519465  | -3.544398 | -2.107512 |
| 1  | 0.835643  | -3.160507 | -1.712340 |
| 1  | 1.941317  | -3.681791 | -0.438050 |

|   |           |           |          |
|---|-----------|-----------|----------|
| 6 | 3.834157  | -1.967611 | 0.961087 |
| 1 | 4.823108  | -2.267202 | 0.588015 |
| 1 | 3.292436  | -2.878790 | 1.229880 |
| 1 | 3.984319  | -1.390780 | 1.876980 |
| 6 | 0.383645  | -0.852772 | 3.170236 |
| 6 | 0.435953  | -1.389387 | 1.731230 |
| 1 | -0.291147 | 0.003292  | 3.237133 |
| 1 | -0.063314 | -1.637850 | 3.800909 |
| 1 | 1.051301  | -2.301100 | 1.725601 |
| 1 | -0.577726 | -1.685675 | 1.420847 |
| 6 | 1.740833  | -0.466483 | 3.764529 |
| 1 | 2.193229  | 0.358067  | 3.200386 |
| 1 | 1.638497  | -0.141188 | 4.806775 |
| 1 | 2.440946  | -1.312082 | 3.750257 |

II

HF = -1309.0246997 hartree

|    |           |           |           |
|----|-----------|-----------|-----------|
| 77 | -1.122946 | -0.210837 | -0.230523 |
| 6  | 0.417085  | 1.312560  | 0.010794  |
| 6  | 2.084958  | 0.929365  | 0.525322  |
| 5  | 0.985464  | 1.623259  | 1.619960  |
| 1  | 0.576838  | 0.965939  | 2.509017  |
| 5  | 0.045103  | 2.822554  | 0.747774  |
| 1  | -1.078332 | 3.008708  | 1.073540  |
| 5  | 0.564136  | 2.740240  | -0.938711 |
| 1  | -0.161740 | 2.891366  | -1.862902 |
| 5  | 1.801852  | 1.492529  | -1.047536 |
| 1  | 1.948380  | 0.779234  | -1.974628 |
| 5  | 2.697147  | 2.117326  | 1.583401  |
| 1  | 3.396670  | 1.727808  | 2.462653  |
| 5  | 1.429882  | 3.339834  | 1.728280  |
| 1  | 1.264678  | 3.936113  | 2.744538  |
| 5  | 1.173492  | 4.042155  | 0.110985  |
| 1  | 0.819556  | 5.166278  | -0.051618 |
| 5  | 2.268204  | 3.209631  | -1.022963 |
| 1  | 2.706571  | 3.720546  | -2.003345 |
| 5  | 3.214407  | 2.042563  | -0.102180 |
| 1  | 4.280696  | 1.626620  | -0.407222 |
| 5  | 2.812013  | 3.606424  | 0.631530  |
| 1  | 3.664343  | 4.406315  | 0.852682  |
| 6  | 2.447649  | -0.539709 | 0.786555  |
| 1  | 2.604667  | -0.646498 | 1.863479  |
| 1  | 1.584667  | -1.150412 | 0.513432  |
| 6  | 3.665668  | -1.074297 | 0.059161  |
| 6  | 4.935751  | -1.031481 | 0.649103  |
| 1  | 5.062274  | -0.587519 | 1.632020  |
| 6  | 6.024518  | -1.550459 | -0.047377 |
| 1  | 7.019536  | -1.525100 | 0.388561  |
| 6  | 5.812753  | -2.099508 | -1.311956 |
| 1  | 6.629868  | -2.515350 | -1.893501 |
| 6  | 4.512606  | -2.104419 | -1.816002 |
| 1  | 4.302214  | -2.526957 | -2.797028 |
| 7  | 3.458709  | -1.612839 | -1.153083 |
| 6  | -3.051176 | -1.052237 | 0.759417  |
| 6  | -2.169224 | -0.582601 | 1.811048  |
| 6  | -1.055408 | -1.501847 | 1.878323  |
| 6  | -1.170624 | -2.418747 | 0.802011  |
| 6  | -2.402566 | -2.127282 | 0.082460  |
| 6  | -4.479970 | -0.629858 | 0.591591  |

|   |           |           |           |
|---|-----------|-----------|-----------|
| 1 | -5.081410 | -1.094624 | 1.384886  |
| 1 | -4.897534 | -0.948518 | -0.365688 |
| 1 | -4.612204 | 0.451326  | 0.678226  |
| 6 | -2.532303 | 0.429630  | 2.859640  |
| 1 | -3.167311 | 1.220223  | 2.449405  |
| 1 | -1.643738 | 0.909458  | 3.277559  |
| 1 | -3.084206 | -0.039298 | 3.686545  |
| 6 | -0.096359 | -1.633359 | 3.024495  |
| 1 | -0.520944 | -2.324150 | 3.767064  |
| 1 | 0.082512  | -0.683426 | 3.529576  |
| 1 | 0.868143  | -2.043916 | 2.716369  |
| 6 | -0.298132 | -3.619380 | 0.574298  |
| 1 | -0.654104 | -4.465837 | 1.178623  |
| 1 | 0.742923  | -3.433253 | 0.853035  |
| 1 | -0.309674 | -3.945280 | -0.469295 |
| 6 | -2.981773 | -2.972504 | -1.017073 |
| 1 | -3.454509 | -3.877575 | -0.611937 |
| 1 | -2.213541 | -3.299961 | -1.725556 |
| 1 | -3.741015 | -2.428205 | -1.585619 |
| 6 | -2.426843 | 1.442001  | -0.776991 |
| 1 | -2.964136 | 1.648649  | 0.155018  |
| 1 | -1.817672 | 2.315445  | -0.978377 |
| 6 | -3.417474 | 1.277211  | -1.932469 |
| 6 | -4.468712 | 2.400732  | -1.941204 |
| 1 | -3.931267 | 0.308263  | -1.903217 |
| 1 | -2.880775 | 1.307122  | -2.887446 |
| 1 | -5.140758 | 2.308770  | -2.803446 |
| 1 | -5.084615 | 2.382385  | -1.033213 |
| 1 | -3.990141 | 3.385885  | -1.992827 |
| 6 | -0.832234 | -0.252594 | -2.398926 |
| 6 | 0.057897  | -1.177189 | -1.817806 |
| 1 | -0.461873 | 0.701099  | -2.761685 |
| 1 | -1.734989 | -0.609414 | -2.885639 |
| 1 | -0.209569 | -2.229767 | -1.829603 |
| 1 | 1.122404  | -0.994965 | -1.749769 |

**1TS2**

**HF = -1308.9781293 hartree**      $\nu^{\ddagger} = -409.4409 \text{ icm}^{-1}$

|    |           |           |           |
|----|-----------|-----------|-----------|
| 77 | 1.061716  | -0.304414 | 0.054268  |
| 6  | -0.492642 | 1.216214  | -0.073544 |
| 6  | -2.180547 | 0.831294  | -0.486087 |
| 5  | -1.165681 | 1.538124  | -1.643993 |
| 1  | -0.843420 | 0.878621  | -2.564816 |
| 5  | -0.167448 | 2.732476  | -0.826058 |
| 1  | 0.945574  | 2.924880  | -1.192302 |
| 5  | -0.586663 | 2.653752  | 0.877006  |
| 1  | 0.198736  | 2.857411  | 1.734240  |
| 5  | -1.797986 | 1.387097  | 1.072316  |
| 1  | -1.870805 | 0.661723  | 2.001086  |
| 5  | -2.869292 | 2.023271  | -1.495880 |
| 1  | -3.620960 | 1.632281  | -2.330314 |
| 5  | -1.617964 | 3.251344  | -1.719883 |
| 1  | -1.523916 | 3.850681  | -2.743902 |
| 5  | -1.267422 | 3.948731  | -0.123805 |
| 1  | -0.907428 | 5.073243  | 0.024513  |
| 5  | -2.281923 | 3.104170  | 1.079180  |
| 1  | -2.656596 | 3.613256  | 2.086998  |
| 5  | -3.275126 | 1.931582  | 0.219952  |
| 1  | -4.319983 | 1.509338  | 0.585401  |

S20

|   |           |           |           |
|---|-----------|-----------|-----------|
| 5 | -2.933172 | 3.504446  | -0.534462 |
| 1 | -3.802014 | 4.300750  | -0.697315 |
| 6 | -2.537979 | -0.639309 | -0.753309 |
| 1 | -2.730709 | -0.734588 | -1.825761 |
| 1 | -1.655709 | -1.240286 | -0.522266 |
| 6 | -3.729689 | -1.185161 | 0.007819  |
| 6 | -5.011041 | -1.175963 | -0.559488 |
| 1 | -5.162865 | -0.755914 | -1.549377 |
| 6 | -6.078958 | -1.697593 | 0.166772  |
| 1 | -7.081683 | -1.697764 | -0.252121 |
| 6 | -5.836198 | -2.216133 | 1.438420  |
| 1 | -6.635826 | -2.633069 | 2.043183  |
| 6 | -4.527102 | -2.188261 | 1.918708  |
| 1 | -4.292605 | -2.586530 | 2.904623  |
| 7 | -3.493646 | -1.693169 | 1.227869  |
| 6 | 3.173677  | -0.289681 | -1.120912 |
| 6 | 2.149534  | -0.084425 | -2.068592 |
| 6 | 1.223890  | -1.220468 | -1.987005 |
| 6 | 1.769578  | -2.153601 | -1.028117 |
| 6 | 2.925125  | -1.557062 | -0.438008 |
| 6 | 4.360219  | 0.594882  | -0.878496 |
| 1 | 5.244534  | 0.209755  | -1.404417 |
| 1 | 4.620221  | 0.649892  | 0.184094  |
| 1 | 4.184385  | 1.614477  | -1.231924 |
| 6 | 2.105237  | 0.996475  | -3.107011 |
| 1 | 2.669100  | 1.880729  | -2.800110 |
| 1 | 1.085015  | 1.315091  | -3.325015 |
| 1 | 2.545673  | 0.628639  | -4.044717 |
| 6 | 0.220850  | -1.602189 | -3.039303 |
| 1 | 0.716902  | -2.190444 | -3.824941 |
| 1 | -0.229845 | -0.731754 | -3.516950 |
| 1 | -0.585452 | -2.217003 | -2.629853 |
| 6 | 1.272294  | -3.550456 | -0.796638 |
| 1 | 1.710139  | -4.232808 | -1.538147 |
| 1 | 0.184401  | -3.615454 | -0.889303 |
| 1 | 1.547804  | -3.925224 | 0.193366  |
| 6 | 3.872428  | -2.238678 | 0.508908  |
| 1 | 4.574345  | -2.880467 | -0.041765 |
| 1 | 3.345432  | -2.874856 | 1.227024  |
| 1 | 4.469778  | -1.519560 | 1.074716  |
| 6 | 2.107990  | 0.962820  | 1.949011  |
| 1 | 2.575810  | 1.356293  | 1.047002  |
| 1 | 1.424104  | 1.717937  | 2.312391  |
| 6 | 3.191810  | 0.658222  | 2.979821  |
| 6 | 4.068382  | 1.894691  | 3.241109  |
| 1 | 3.828755  | -0.172055 | 2.649322  |
| 1 | 2.740462  | 0.343020  | 3.929382  |
| 1 | 4.826508  | 1.678091  | 4.003086  |
| 1 | 4.588017  | 2.220543  | 2.332321  |
| 1 | 3.465809  | 2.738073  | 3.597274  |
| 6 | 0.893065  | -0.637930 | 2.402084  |
| 6 | 0.003719  | -1.371590 | 1.513583  |
| 1 | 0.414572  | 0.027335  | 3.116296  |
| 1 | 1.709137  | -1.214855 | 2.823574  |
| 1 | 0.219637  | -2.436148 | 1.413462  |
| 1 | -1.060126 | -1.182775 | 1.608016  |

INT2

HF = -1309.0443344 hartree

S21

|    |           |           |           |
|----|-----------|-----------|-----------|
| 77 | -1.011675 | -0.231280 | -0.328877 |
| 6  | 0.569767  | -0.486350 | 1.071440  |
| 6  | 2.233621  | -0.682801 | 0.683568  |
| 5  | 1.324467  | -2.037841 | 1.179205  |
| 1  | 1.081423  | -2.856499 | 0.359951  |
| 5  | 0.236557  | -1.474396 | 2.441297  |
| 1  | -0.849203 | -1.945372 | 2.527548  |
| 5  | 0.480876  | 0.267250  | 2.601880  |
| 1  | -0.431958 | 0.999731  | 2.805972  |
| 5  | 1.737356  | 0.748050  | 1.449967  |
| 1  | 1.756166  | 1.748188  | 0.829078  |
| 5  | 2.991823  | -1.798154 | 1.739256  |
| 1  | 3.833883  | -2.489535 | 1.263941  |
| 5  | 1.741549  | -2.304371 | 2.884030  |
| 1  | 1.725876  | -3.404564 | 3.336698  |
| 5  | 1.216369  | -0.851343 | 3.781095  |
| 1  | 0.817366  | -0.903624 | 4.900580  |
| 5  | 2.146959  | 0.543204  | 3.163678  |
| 1  | 2.424519  | 1.488685  | 3.829076  |
| 5  | 3.247718  | -0.057912 | 1.918513  |
| 1  | 4.269114  | 0.444563  | 1.591187  |
| 5  | 2.928116  | -1.054997 | 3.349140  |
| 1  | 3.785005  | -1.257820 | 4.148899  |
| 6  | 2.616914  | -0.675003 | -0.808257 |
| 1  | 2.938305  | -1.688637 | -1.066971 |
| 1  | 1.712291  | -0.455627 | -1.380393 |
| 6  | 3.691517  | 0.308320  | -1.226137 |
| 6  | 5.047598  | -0.042427 | -1.188903 |
| 1  | 5.344523  | -1.025683 | -0.836018 |
| 6  | 5.999414  | 0.888169  | -1.598708 |
| 1  | 7.057225  | 0.640528  | -1.575760 |
| 6  | 5.568055  | 2.139771  | -2.037559 |
| 1  | 6.271797  | 2.898249  | -2.366867 |
| 6  | 4.196929  | 2.395417  | -2.048423 |
| 1  | 3.817265  | 3.356919  | -2.389912 |
| 7  | 3.273594  | 1.508075  | -1.659545 |
| 6  | -2.930314 | -1.492494 | -0.097851 |
| 6  | -1.966647 | -2.425455 | -0.546408 |
| 6  | -1.376657 | -1.854993 | -1.738769 |
| 6  | -2.183748 | -0.695515 | -2.157748 |
| 6  | -3.111988 | -0.446025 | -1.121573 |
| 6  | -3.760516 | -1.602764 | 1.143846  |
| 1  | -4.741340 | -2.038340 | 0.906688  |
| 1  | -3.937667 | -0.622107 | 1.595534  |
| 1  | -3.280438 | -2.236952 | 1.892292  |
| 6  | -1.636115 | -3.743010 | 0.088307  |
| 1  | -1.571165 | -3.670385 | 1.177308  |
| 1  | -0.685392 | -4.140354 | -0.272070 |
| 1  | -2.413968 | -4.481095 | -0.151301 |
| 6  | -0.339760 | -2.511642 | -2.598130 |
| 1  | -0.822061 | -3.213729 | -3.292863 |
| 1  | 0.381394  | -3.073575 | -2.000155 |
| 1  | 0.208899  | -1.778497 | -3.195511 |
| 6  | -2.058269 | 0.017980  | -3.469650 |
| 1  | -2.543590 | -0.560573 | -4.267272 |
| 1  | -1.010752 | 0.161913  | -3.751799 |
| 1  | -2.530718 | 1.003024  | -3.438872 |
| 6  | -4.218211 | 0.565091  | -1.116563 |

|   |           |          |           |
|---|-----------|----------|-----------|
| 1 | -5.146369 | 0.109431 | -1.489030 |
| 1 | -3.987584 | 1.421703 | -1.753996 |
| 1 | -4.416383 | 0.944048 | -0.111044 |
| 6 | -2.236207 | 3.050274 | 0.589474  |
| 1 | -2.836293 | 3.205893 | -0.320265 |
| 1 | -2.623459 | 2.134957 | 1.062296  |
| 6 | -2.451411 | 4.235296 | 1.540717  |
| 6 | -3.917761 | 4.439918 | 1.936079  |
| 1 | -2.069004 | 5.151279 | 1.067938  |
| 1 | -1.846362 | 4.084916 | 2.445594  |
| 1 | -4.036330 | 5.296194 | 2.610117  |
| 1 | -4.545909 | 4.621599 | 1.054525  |
| 1 | -4.316578 | 3.556367 | 2.450707  |
| 6 | -0.765263 | 2.840475 | 0.212181  |
| 6 | -0.479637 | 1.734664 | -0.827556 |
| 1 | -0.192733 | 2.663615 | 1.127228  |
| 1 | -0.376853 | 3.785049 | -0.203076 |
| 1 | -1.025144 | 1.979605 | -1.749922 |
| 1 | 0.589225  | 1.759721 | -1.070250 |

**1V-1**

**HF = -1151.9065907 hartree**

|    |           |           |           |
|----|-----------|-----------|-----------|
| 77 | -1.325366 | -0.309813 | -0.324813 |
| 6  | 1.912703  | 0.724554  | 0.379951  |
| 5  | 0.945748  | 1.812920  | 1.254275  |
| 1  | 0.563602  | 1.461674  | 2.322001  |
| 5  | 0.158940  | 2.832006  | 0.045510  |
| 1  | -0.909215 | 3.320004  | 0.236155  |
| 5  | 0.661166  | 2.241392  | -1.558527 |
| 1  | -0.019182 | 2.298124  | -2.532789 |
| 5  | 1.758561  | 0.885654  | -1.307158 |
| 1  | 2.008422  | -0.045622 | -1.984630 |
| 5  | 2.694120  | 2.083286  | 1.130836  |
| 1  | 3.461633  | 1.839664  | 2.000004  |
| 5  | 1.601653  | 3.440615  | 0.904767  |
| 1  | 1.557988  | 4.309033  | 1.715720  |
| 5  | 1.421987  | 3.706044  | -0.853447 |
| 1  | 1.250408  | 4.787486  | -1.316952 |
| 5  | 2.417528  | 2.498420  | -1.688853 |
| 1  | 3.043249  | 2.616074  | -2.689589 |
| 1  | 4.022410  | 1.057969  | -0.562640 |
| 5  | 2.996126  | 3.241201  | -0.176423 |
| 1  | 4.014871  | 3.848849  | -0.156634 |
| 6  | 2.259812  | -0.646237 | 0.997215  |
| 1  | 2.292570  | -0.517676 | 2.083121  |
| 1  | 1.425352  | -1.310388 | 0.764321  |
| 6  | 3.543345  | -1.301263 | 0.527132  |
| 6  | 4.754572  | -1.105427 | 1.205935  |
| 1  | 4.789306  | -0.471362 | 2.087092  |
| 6  | 5.905408  | -1.738066 | 0.736299  |
| 1  | 6.854980  | -1.602183 | 1.246850  |
| 6  | 5.811797  | -2.549681 | -0.393107 |
| 1  | 6.679130  | -3.065132 | -0.794198 |
| 6  | 4.562002  | -2.690474 | -0.998964 |
| 1  | 4.442408  | -3.319608 | -1.879326 |
| 7  | 3.452458  | -2.088464 | -0.557908 |
| 6  | -3.374311 | 0.605308  | 0.077868  |
| 6  | -2.744930 | 0.481388  | 1.338548  |
| 6  | -2.361411 | -0.917728 | 1.457801  |

|   |           |           |           |
|---|-----------|-----------|-----------|
| 6 | -3.046447 | -1.684733 | 0.403091  |
| 6 | -3.606474 | -0.747256 | -0.477245 |
| 6 | -3.901995 | 1.866479  | -0.537526 |
| 1 | -4.969719 | 1.992008  | -0.308482 |
| 1 | -3.797644 | 1.851469  | -1.626672 |
| 1 | -3.369263 | 2.744614  | -0.164662 |
| 6 | -2.529946 | 1.555081  | 2.361433  |
| 1 | -2.395720 | 2.536410  | 1.899982  |
| 1 | -1.647343 | 1.358481  | 2.974512  |
| 1 | -3.394945 | 1.616383  | 3.037089  |
| 6 | -1.692579 | -1.533018 | 2.650298  |
| 1 | -2.436522 | -1.788690 | 3.418444  |
| 1 | -0.969772 | -0.845390 | 3.097509  |
| 1 | -1.164205 | -2.451445 | 2.378217  |
| 6 | -3.054166 | -3.179231 | 0.291488  |
| 1 | -3.778109 | -3.621250 | 0.989700  |
| 1 | -2.071443 | -3.602486 | 0.524098  |
| 1 | -3.323694 | -3.507527 | -0.716133 |
| 6 | -4.353759 | -1.015046 | -1.748894 |
| 1 | -5.435881 | -0.898924 | -1.597561 |
| 1 | -4.174374 | -2.028265 | -2.118070 |
| 1 | -4.056983 | -0.315476 | -2.536867 |
| 6 | -0.316423 | -1.583132 | -1.610836 |
| 1 | -0.891619 | -2.503458 | -1.783380 |
| 1 | 0.704086  | -1.857628 | -1.322596 |
| 1 | -0.228405 | -1.050211 | -2.572693 |
| 5 | 0.294466  | 1.052473  | -0.248366 |
| 6 | 3.075819  | 1.570025  | -0.445156 |

I-1

HF = -1230.4684931 hartree

|    |           |           |           |
|----|-----------|-----------|-----------|
| 77 | -1.360877 | -0.026282 | -0.448420 |
| 6  | 1.927319  | 0.738460  | 0.455032  |
| 5  | 0.976832  | 1.826262  | 1.335188  |
| 1  | 0.486089  | 1.453365  | 2.345133  |
| 5  | 0.362702  | 3.004218  | 0.177441  |
| 1  | -0.669492 | 3.567265  | 0.351528  |
| 5  | 0.957968  | 2.518139  | -1.428830 |
| 1  | 0.406689  | 2.732341  | -2.457770 |
| 5  | 1.900182  | 1.056155  | -1.215852 |
| 1  | 2.152995  | 0.183147  | -1.967786 |
| 5  | 2.746860  | 1.964180  | 1.376182  |
| 1  | 3.415878  | 1.584174  | 2.277898  |
| 5  | 1.775703  | 3.414730  | 1.192849  |
| 1  | 1.726990  | 4.209424  | 2.075857  |
| 5  | 1.763452  | 3.845468  | -0.538380 |
| 1  | 1.712644  | 4.971611  | -0.916024 |
| 5  | 2.724565  | 2.631922  | -1.401744 |
| 1  | 3.434750  | 2.775070  | -2.341051 |
| 1  | 4.114808  | 0.972213  | -0.304664 |
| 5  | 3.235790  | 3.196997  | 0.205668  |
| 1  | 4.295100  | 3.710736  | 0.351650  |
| 6  | 2.139500  | -0.700983 | 0.962643  |
| 1  | 2.158650  | -0.666317 | 2.055173  |
| 1  | 1.254866  | -1.266633 | 0.660839  |
| 6  | 3.371728  | -1.429009 | 0.463250  |
| 6  | 4.574049  | -1.403449 | 1.184277  |
| 1  | 4.637431  | -0.850423 | 2.117001  |
| 6  | 5.677632  | -2.097653 | 0.689103  |

S24



|   |           |           |           |
|---|-----------|-----------|-----------|
| 1 | 6.619175  | -2.093075 | 1.231458  |
| 6 | 5.546806  | -2.799358 | -0.508261 |
| 1 | 6.376271  | -3.357064 | -0.932091 |
| 6 | 4.309330  | -2.772974 | -1.153361 |
| 1 | 4.162076  | -3.312058 | -2.087565 |
| 7 | 3.244459  | -2.110740 | -0.687939 |
| 6 | -3.552848 | -0.206754 | 0.471405  |
| 6 | -2.594832 | 0.253586  | 1.466872  |
| 6 | -1.723271 | -0.857590 | 1.767943  |
| 6 | -2.060467 | -1.924593 | 0.880536  |
| 6 | -3.204114 | -1.527540 | 0.088381  |
| 6 | -4.768621 | 0.553276  | 0.032489  |
| 1 | -5.581505 | 0.408401  | 0.757198  |
| 1 | -5.133591 | 0.217010  | -0.942382 |
| 1 | -4.578331 | 1.627253  | -0.034818 |
| 6 | -2.731509 | 1.513214  | 2.274533  |
| 1 | -1.775011 | 1.814463  | 2.707902  |
| 1 | -3.449165 | 1.381680  | 3.096892  |
| 1 | -3.085039 | 2.346471  | 1.659723  |
| 6 | -0.844370 | -0.991707 | 2.977833  |
| 1 | -1.430798 | -1.394829 | 3.816208  |
| 1 | -0.434325 | -0.033920 | 3.300436  |
| 1 | -0.010376 | -1.679048 | 2.810224  |
| 6 | -1.477778 | -3.308717 | 0.919099  |
| 1 | -2.030269 | -3.938392 | 1.630703  |
| 1 | -0.429262 | -3.302890 | 1.231073  |
| 1 | -1.532958 | -3.804925 | -0.054743 |
| 6 | -3.923303 | -2.403395 | -0.898304 |
| 1 | -4.608332 | -3.099555 | -0.394745 |
| 1 | -3.223991 | -3.009465 | -1.485226 |
| 1 | -4.516802 | -1.812802 | -1.602370 |
| 6 | -0.973211 | -0.532338 | -2.513563 |
| 6 | -0.225352 | -1.416607 | -1.696404 |
| 1 | -0.463123 | 0.268059  | -3.041593 |
| 1 | -1.890756 | -0.871834 | -2.992451 |
| 1 | -0.610219 | -2.418569 | -1.520116 |
| 1 | 0.853226  | -1.350704 | -1.630802 |
| 6 | -2.193803 | 1.670176  | -1.448375 |
| 1 | -2.479289 | 2.415454  | -0.700424 |
| 1 | -1.520752 | 2.139034  | -2.160802 |
| 1 | -3.085541 | 1.328937  | -1.985949 |
| 6 | 3.205207  | 1.550359  | -0.203015 |
| 5 | 0.343757  | 1.245302  | -0.272980 |

**1TS1-1**      **HF = -1230.4160976 hartree**       $\nu^* = -473.8487 \text{ cm}^{-1}$

|    |           |           |           |
|----|-----------|-----------|-----------|
| 77 | -1.317492 | -0.193523 | -0.337997 |
| 6  | 1.965333  | 0.751086  | 0.454406  |
| 5  | 1.005079  | 1.825128  | 1.329208  |
| 1  | 0.602775  | 1.459520  | 2.381632  |
| 5  | 0.270079  | 2.914752  | 0.148865  |
| 1  | -0.787569 | 3.429194  | 0.332609  |
| 5  | 0.813772  | 2.380933  | -1.456728 |
| 1  | 0.184448  | 2.513556  | -2.455915 |
| 5  | 1.848005  | 0.981124  | -1.220332 |
| 1  | 2.107845  | 0.079161  | -1.935886 |
| 5  | 2.762486  | 2.061139  | 1.273932  |
| 1  | 3.494245  | 1.763552  | 2.157434  |
| 5  | 1.705526  | 3.448664  | 1.072736  |

|   |           |           |           |
|---|-----------|-----------|-----------|
| 1 | 1.658068  | 4.283326  | 1.918329  |
| 5 | 1.588909  | 3.790388  | -0.675412 |
| 1 | 1.459380  | 4.892568  | -1.102757 |
| 5 | 2.573885  | 2.586926  | -1.527525 |
| 1 | 3.228534  | 2.720669  | -2.507991 |
| 1 | 4.104319  | 1.058965  | -0.421357 |
| 5 | 3.128668  | 3.257966  | 0.024444  |
| 1 | 4.162936  | 3.835019  | 0.094695  |
| 6 | 2.259604  | -0.646934 | 1.029841  |
| 1 | 2.308227  | -0.551621 | 2.118244  |
| 1 | 1.389061  | -1.260758 | 0.787956  |
| 6 | 3.510304  | -1.343350 | 0.532891  |
| 6 | 4.727420  | -1.228155 | 1.219958  |
| 1 | 4.787470  | -0.628388 | 2.123588  |
| 6 | 5.849903  | -1.895842 | 0.731181  |
| 1 | 6.802545  | -1.822123 | 1.248701  |
| 6 | 5.723805  | -2.661850 | -0.426608 |
| 1 | 6.567769  | -3.202894 | -0.843496 |
| 6 | 4.471612  | -2.722305 | -1.040214 |
| 1 | 4.327264  | -3.313551 | -1.942925 |
| 7 | 3.388758  | -2.085897 | -0.580757 |
| 6 | -3.502712 | 0.263569  | 0.534102  |
| 6 | -2.532322 | 0.455589  | 1.546976  |
| 6 | -1.818934 | -0.812006 | 1.719504  |
| 6 | -2.486409 | -1.797475 | 0.878864  |
| 6 | -3.484632 | -1.135577 | 0.125729  |
| 6 | -4.471706 | 1.286281  | 0.019711  |
| 1 | -5.495436 | 1.054834  | 0.343595  |
| 1 | -4.483065 | 1.325050  | -1.076713 |
| 1 | -4.227482 | 2.287929  | 0.382640  |
| 6 | -2.403737 | 1.668212  | 2.421925  |
| 1 | -1.403365 | 1.763405  | 2.845175  |
| 1 | -3.112534 | 1.601857  | 3.259884  |
| 1 | -2.616246 | 2.592039  | 1.877376  |
| 6 | -0.935471 | -1.156698 | 2.885816  |
| 1 | -1.541055 | -1.417627 | 3.766100  |
| 1 | -0.291167 | -0.320591 | 3.165093  |
| 1 | -0.293419 | -2.014576 | 2.663824  |
| 6 | -2.177890 | -3.266461 | 0.869322  |
| 1 | -2.727661 | -3.782439 | 1.668531  |
| 1 | -1.111825 | -3.452640 | 1.029611  |
| 1 | -2.458122 | -3.738109 | -0.077527 |
| 6 | -4.443356 | -1.751386 | -0.852651 |
| 1 | -5.423010 | -1.931315 | -0.387793 |
| 1 | -4.080239 | -2.712829 | -1.228446 |
| 1 | -4.618323 | -1.100025 | -1.716469 |
| 6 | -0.708933 | -0.725812 | -2.591030 |
| 6 | -0.215888 | -1.550946 | -1.488752 |
| 1 | 0.048318  | -0.132525 | -3.094150 |
| 1 | -1.396267 | -1.209123 | -3.283210 |
| 1 | -0.662601 | -2.545899 | -1.414733 |
| 1 | 0.863280  | -1.590087 | -1.361206 |
| 6 | -2.007185 | 0.771242  | -2.453195 |
| 1 | -2.060148 | 1.684136  | -1.861612 |
| 1 | -1.635614 | 1.068147  | -3.433102 |
| 1 | -2.988239 | 0.310716  | -2.561927 |
| 6 | 3.170219  | 1.593832  | -0.303902 |
| 5 | 0.325253  | 1.140166  | -0.219187 |

INT1-1

HF = -1230.4710699 hartree

|    |           |           |           |
|----|-----------|-----------|-----------|
| 77 | 1.308374  | -0.233502 | 0.107879  |
| 6  | -1.986585 | 0.782176  | -0.322053 |
| 5  | -1.068513 | 1.998963  | -1.062738 |
| 1  | -0.707631 | 1.798783  | -2.174980 |
| 5  | -0.269522 | 2.866341  | 0.250742  |
| 1  | 0.784774  | 3.397636  | 0.103839  |
| 5  | -0.719641 | 2.059100  | 1.773341  |
| 1  | -0.016796 | 2.005428  | 2.731449  |
| 5  | -1.797842 | 0.723092  | 1.365622  |
| 1  | -2.021361 | -0.298410 | 1.909074  |
| 5  | -2.815296 | 2.209934  | -0.868736 |
| 1  | -3.597574 | 2.066230  | -1.747007 |
| 5  | -1.744324 | 3.550046  | -0.490110 |
| 1  | -1.736522 | 4.518377  | -1.179954 |
| 5  | -1.525478 | 3.587381  | 1.283242  |
| 1  | -1.363754 | 4.601952  | 1.881623  |
| 5  | -2.477016 | 2.257757  | 1.974732  |
| 1  | -3.081003 | 2.228254  | 2.995074  |
| 1  | -4.080352 | 0.941804  | 0.704722  |
| 5  | -3.106856 | 3.179416  | 0.586192  |
| 1  | -4.137446 | 3.761262  | 0.669101  |
| 6  | -2.319289 | -0.507477 | -1.100818 |
| 1  | -2.320011 | -0.255223 | -2.165291 |
| 1  | -1.495529 | -1.200986 | -0.922023 |
| 6  | -3.618738 | -1.203176 | -0.747809 |
| 6  | -4.805047 | -0.927888 | -1.442823 |
| 1  | -4.807817 | -0.198750 | -2.247594 |
| 6  | -5.971659 | -1.604289 | -1.087582 |
| 1  | -6.902486 | -1.409073 | -1.613180 |
| 6  | -5.917600 | -2.537196 | -0.053188 |
| 1  | -6.798255 | -3.091599 | 0.256498  |
| 6  | -4.690277 | -2.748474 | 0.577780  |
| 1  | -4.602578 | -3.472159 | 1.386350  |
| 7  | -3.565399 | -2.105518 | 0.246391  |
| 6  | 3.341500  | 0.690432  | -0.381707 |
| 6  | 2.554377  | 0.852765  | -1.549063 |
| 6  | 2.080178  | -0.474231 | -1.891189 |
| 6  | 2.845861  | -1.462575 | -1.103688 |
| 6  | 3.593766  | -0.747261 | -0.159477 |
| 6  | 3.996612  | 1.787930  | 0.402061  |
| 1  | 5.025660  | 1.951192  | 0.051604  |
| 1  | 4.047563  | 1.542485  | 1.467319  |
| 1  | 3.451427  | 2.729724  | 0.301222  |
| 6  | 2.303926  | 2.125635  | -2.298810 |
| 1  | 1.369108  | 2.089745  | -2.861470 |
| 1  | 3.115939  | 2.308830  | -3.017036 |
| 1  | 2.249533  | 2.988440  | -1.630335 |
| 6  | 1.253552  | -0.817420 | -3.094004 |
| 1  | 1.900307  | -0.968094 | -3.970366 |
| 1  | 0.547067  | -0.017997 | -3.332231 |
| 1  | 0.685782  | -1.739320 | -2.937378 |
| 6  | 2.787201  | -2.946421 | -1.303414 |
| 1  | 3.397884  | -3.248662 | -2.165325 |
| 1  | 1.762629  | -3.283780 | -1.491581 |
| 1  | 3.157130  | -3.487447 | -0.428128 |
| 6  | 4.545423  | -1.294305 | 0.861284  |

S27

|   |           |           |          |
|---|-----------|-----------|----------|
| 1 | 5.582339  | -1.205572 | 0.507654 |
| 1 | 4.354478  | -2.350583 | 1.068606 |
| 1 | 4.476190  | -0.753235 | 1.809032 |
| 6 | 0.500833  | -1.505225 | 2.829927 |
| 6 | 0.461902  | -1.738627 | 1.300930 |
| 1 | -0.072084 | -0.610208 | 3.094436 |
| 1 | -0.018900 | -2.348220 | 3.312492 |
| 1 | 1.015489  | -2.667032 | 1.085125 |
| 1 | -0.582088 | -1.930490 | 1.023819 |
| 6 | 1.900781  | -1.389175 | 3.441237 |
| 1 | 2.412217  | -0.485075 | 3.089153 |
| 1 | 1.851272  | -1.338599 | 4.536091 |
| 1 | 2.525938  | -2.251861 | 3.176400 |
| 6 | -3.147535 | 1.486831  | 0.634461 |
| 5 | -0.358033 | 1.061638  | 0.311604 |

II-1

HF = -1309.0315787 hartree

|    |           |           |           |
|----|-----------|-----------|-----------|
| 77 | -1.197454 | -0.209800 | -0.259061 |
| 6  | 2.093255  | 0.735451  | 0.531376  |
| 5  | 1.124986  | 1.533902  | 1.664152  |
| 1  | 0.768863  | 0.930922  | 2.617429  |
| 5  | 0.295120  | 2.822604  | 0.792328  |
| 1  | -0.769028 | 3.222709  | 1.138539  |
| 5  | 0.791588  | 2.699170  | -0.914965 |
| 1  | 0.136714  | 3.028481  | -1.848987 |
| 5  | 1.885635  | 1.339208  | -1.042835 |
| 1  | 2.156750  | 0.651548  | -1.961728 |
| 5  | 2.868609  | 1.863678  | 1.605132  |
| 1  | 3.650209  | 1.407479  | 2.370294  |
| 5  | 1.746130  | 3.204157  | 1.764371  |
| 1  | 1.697202  | 3.818472  | 2.781083  |
| 5  | 1.536549  | 3.930740  | 0.147800  |
| 1  | 1.340655  | 5.092770  | -0.009496 |
| 5  | 2.531948  | 3.005628  | -0.990182 |
| 1  | 3.136209  | 3.392392  | -1.934773 |
| 1  | 4.169971  | 1.346901  | -0.322652 |
| 5  | 3.126400  | 3.331963  | 0.654879  |
| 1  | 4.138545  | 3.928719  | 0.818623  |
| 6  | 2.499110  | -0.735184 | 0.747047  |
| 1  | 2.590103  | -0.898485 | 1.823831  |
| 1  | 1.665731  | -1.341782 | 0.387616  |
| 6  | 3.768680  | -1.200578 | 0.062401  |
| 6  | 5.004962  | -1.165525 | 0.723189  |
| 1  | 5.066266  | -0.796745 | 1.742906  |
| 6  | 6.144957  | -1.609935 | 0.054151  |
| 1  | 7.113573  | -1.592359 | 0.546284  |
| 6  | 6.015862  | -2.079887 | -1.251980 |
| 1  | 6.873695  | -2.438214 | -1.812676 |
| 6  | 4.743608  | -2.084026 | -1.826124 |
| 1  | 4.597256  | -2.448176 | -2.841478 |
| 7  | 3.643431  | -1.659886 | -1.194340 |
| 6  | -3.240385 | -0.775994 | 0.895095  |
| 6  | -2.168878 | -0.461354 | 1.821198  |
| 6  | -1.199390 | -1.528174 | 1.733478  |
| 6  | -1.616647 | -2.402891 | 0.682194  |
| 6  | -2.884525 | -1.942199 | 0.166940  |
| 6  | -4.567513 | -0.078153 | 0.883728  |
| 1  | -5.120286 | -0.334173 | 1.798213  |

|   |           |           |           |
|---|-----------|-----------|-----------|
| 1 | -5.185704 | -0.374699 | 0.033277  |
| 1 | -4.465048 | 1.010658  | 0.866245  |
| 6 | -2.276201 | 0.558201  | 2.920244  |
| 1 | -2.687840 | 1.503304  | 2.552673  |
| 1 | -1.302633 | 0.778836  | 3.362305  |
| 1 | -2.935937 | 0.201068  | 3.724229  |
| 6 | -0.143920 | -1.849537 | 2.752562  |
| 1 | -0.595054 | -2.396383 | 3.593228  |
| 1 | 0.324183  | -0.953640 | 3.163332  |
| 1 | 0.643478  | -2.487416 | 2.341348  |
| 6 | -0.968482 | -3.709340 | 0.322198  |
| 1 | -1.351549 | -4.515686 | 0.963367  |
| 1 | 0.117902  | -3.679200 | 0.446574  |
| 1 | -1.178181 | -3.998794 | -0.712211 |
| 6 | -3.707340 | -2.648292 | -0.873880 |
| 1 | -4.251894 | -3.502196 | -0.447170 |
| 1 | -3.084085 | -3.039117 | -1.686115 |
| 1 | -4.445789 | -1.979384 | -1.324477 |
| 6 | -2.290479 | 1.572150  | -0.835692 |
| 1 | -2.710769 | 1.935261  | 0.110398  |
| 1 | -1.610780 | 2.345773  | -1.179544 |
| 6 | -3.402887 | 1.429612  | -1.882479 |
| 6 | -4.272599 | 2.695900  | -1.967129 |
| 1 | -4.049391 | 0.568019  | -1.677982 |
| 1 | -2.963855 | 1.249719  | -2.870552 |
| 1 | -5.031984 | 2.606883  | -2.754456 |
| 1 | -4.793223 | 2.888440  | -1.020500 |
| 1 | -3.660959 | 3.578698  | -2.189232 |
| 6 | -0.935833 | -0.319095 | -2.404049 |
| 6 | -0.018779 | -1.212658 | -1.795494 |
| 1 | -0.577441 | 0.615044  | -2.827492 |
| 1 | -1.834317 | -0.710887 | -2.876101 |
| 1 | -0.257829 | -2.273248 | -1.779151 |
| 1 | 1.044505  | -1.012331 | -1.789387 |
| 5 | 0.402068  | 1.181983  | 0.027945  |
| 6 | 3.221177  | 1.791416  | -0.050747 |

**1TS2-1**

**HF = -1308.9792731 hartree**      $\nu^{\ddagger} = -438.1918 \text{ icm}^{-1}$

|    |           |           |           |
|----|-----------|-----------|-----------|
| 77 | 1.166316  | -0.293373 | 0.060759  |
| 6  | -2.159690 | 0.629998  | -0.532385 |
| 5  | -1.297805 | 1.371799  | -1.773119 |
| 1  | -1.039131 | 0.709891  | -2.719771 |
| 5  | -0.398678 | 2.701958  | -1.041188 |
| 1  | 0.631543  | 3.097002  | -1.485032 |
| 5  | -0.742558 | 2.663629  | 0.696267  |
| 1  | -0.001353 | 3.067773  | 1.528273  |
| 5  | -1.812310 | 1.299190  | 0.991601  |
| 1  | -1.988546 | 0.646770  | 1.960101  |
| 5  | -3.029321 | 1.708037  | -1.583633 |
| 1  | -3.872188 | 1.216027  | -2.255695 |
| 5  | -1.931831 | 3.036657  | -1.902534 |
| 1  | -1.977437 | 3.602823  | -2.947387 |
| 5  | -1.590040 | 3.838468  | -0.347528 |
| 1  | -1.384876 | 5.006496  | -0.259227 |
| 5  | -2.474731 | 2.962900  | 0.918604  |
| 1  | -2.995132 | 3.395513  | 1.893177  |
| 1  | -4.156023 | 1.274681  | 0.472992  |
| 5  | -3.212286 | 3.214684  | -0.681312 |

|   |           |           |           |
|---|-----------|-----------|-----------|
| 1 | -4.237308 | 3.803435  | -0.783918 |
| 6 | -2.573649 | -0.847091 | -0.688019 |
| 1 | -2.712286 | -1.034760 | -1.756112 |
| 1 | -1.722300 | -1.444861 | -0.358046 |
| 6 | -3.818093 | -1.283482 | 0.057663  |
| 6 | -5.061283 | -1.350924 | -0.587485 |
| 1 | -5.143987 | -1.086548 | -1.637594 |
| 6 | -6.181184 | -1.760522 | 0.135365  |
| 1 | -7.154087 | -1.820515 | -0.344961 |
| 6 | -6.026860 | -2.093614 | 1.480023  |
| 1 | -6.868206 | -2.420022 | 2.083681  |
| 6 | -4.750007 | -2.000670 | 2.036728  |
| 1 | -4.584034 | -2.256132 | 3.081991  |
| 7 | -3.669299 | -1.608791 | 1.353403  |
| 6 | 3.235701  | -0.073821 | -1.092392 |
| 6 | 2.158113  | -0.063785 | -2.016886 |
| 6 | 1.441224  | -1.332138 | -1.877549 |
| 6 | 2.195844  | -2.147896 | -0.939261 |
| 6 | 3.265706  | -1.372100 | -0.433499 |
| 6 | 4.258468  | 1.009418  | -0.910738 |
| 1 | 5.166967  | 0.798927  | -1.492275 |
| 1 | 4.564388  | 1.109742  | 0.136649  |
| 1 | 3.874871  | 1.980053  | -1.237390 |
| 6 | 1.956140  | 0.946995  | -3.106872 |
| 1 | 2.281471  | 1.945157  | -2.804170 |
| 1 | 0.912537  | 1.021159  | -3.413289 |
| 1 | 2.542500  | 0.656728  | -3.990696 |
| 6 | 0.435665  | -1.882024 | -2.850353 |
| 1 | 0.942595  | -2.334019 | -3.715631 |
| 1 | -0.230893 | -1.104298 | -3.227798 |
| 1 | -0.182517 | -2.659258 | -2.390035 |
| 6 | 1.903634  | -3.583424 | -0.613051 |
| 1 | 2.367136  | -4.251721 | -1.352011 |
| 1 | 0.828643  | -3.787356 | -0.617990 |
| 1 | 2.292202  | -3.865560 | 0.370600  |
| 6 | 4.329804  | -1.838700 | 0.519210  |
| 1 | 5.153727  | -2.326027 | -0.021125 |
| 1 | 3.943685  | -2.563933 | 1.243065  |
| 1 | 4.763610  | -1.006541 | 1.081077  |
| 6 | 1.945582  | 1.080846  | 2.013463  |
| 1 | 2.383555  | 1.553183  | 1.134317  |
| 1 | 1.167075  | 1.743481  | 2.374805  |
| 6 | 3.042845  | 0.871330  | 3.054597  |
| 6 | 3.788884  | 2.179836  | 3.361157  |
| 1 | 3.761060  | 0.118316  | 2.704318  |
| 1 | 2.617913  | 0.480979  | 3.989012  |
| 1 | 4.556824  | 2.021536  | 4.128138  |
| 1 | 4.283250  | 2.579110  | 2.467552  |
| 1 | 3.100912  | 2.949970  | 3.729074  |
| 6 | 0.943458  | -0.650013 | 2.393338  |
| 6 | 0.077229  | -1.390552 | 1.479920  |
| 1 | 0.437610  | -0.075913 | 3.167203  |
| 1 | 1.799904  | -1.198896 | 2.773969  |
| 1 | 0.313797  | -2.451810 | 1.372839  |
| 1 | -0.989902 | -1.230367 | 1.598976  |
| 5 | -0.429950 | 1.095053  | -0.184376 |
| 6 | -3.236069 | 1.707198  | 0.100724  |

INT2-1

HF = -1309.0400697 hartree

|    |           |           |           |
|----|-----------|-----------|-----------|
| 77 | -1.199967 | -0.383993 | -0.136949 |
| 6  | 2.169725  | 0.367167  | 0.433606  |
| 5  | 1.766947  | -0.767602 | 1.634754  |
| 1  | 1.804005  | -1.916485 | 1.333734  |
| 5  | 0.675467  | 0.077156  | 2.739971  |
| 1  | -0.162077 | -0.498593 | 3.354803  |
| 5  | 0.407017  | 1.710990  | 2.088891  |
| 1  | -0.602655 | 2.325051  | 2.226074  |
| 5  | 1.352649  | 1.856206  | 0.616477  |
| 1  | 1.198206  | 2.521172  | -0.347928 |
| 5  | 3.330441  | 0.062740  | 1.689530  |
| 1  | 4.357244  | -0.430998 | 1.378219  |
| 5  | 2.397550  | -0.095096 | 3.166627  |
| 1  | 2.785634  | -0.804965 | 4.038090  |
| 5  | 1.550770  | 1.452071  | 3.449560  |
| 1  | 1.327427  | 1.860852  | 4.543636  |
| 5  | 1.975502  | 2.555058  | 2.126442  |
| 1  | 2.149738  | 3.727731  | 2.164008  |
| 1  | 3.728777  | 2.072797  | 0.475360  |
| 5  | 3.198662  | 1.446306  | 2.789713  |
| 1  | 4.196816  | 1.871818  | 3.269095  |
| 6  | 2.549130  | -0.057867 | -0.999039 |
| 1  | 2.025755  | -0.997358 | -1.191698 |
| 1  | 2.137976  | 0.680311  | -1.691319 |
| 6  | 4.024524  | -0.216399 | -1.306066 |
| 6  | 4.581786  | -1.473262 | -1.568358 |
| 1  | 3.962176  | -2.363802 | -1.520424 |
| 6  | 5.936563  | -1.562249 | -1.885059 |
| 1  | 6.390781  | -2.527343 | -2.092616 |
| 6  | 6.694318  | -0.393309 | -1.928880 |
| 1  | 7.752298  | -0.411722 | -2.171551 |
| 6  | 6.053722  | 0.815097  | -1.651100 |
| 1  | 6.608386  | 1.751616  | -1.674003 |
| 7  | 4.753610  | 0.912803  | -1.353023 |
| 6  | -2.833420 | -1.334806 | 1.200374  |
| 6  | -1.800256 | -2.284070 | 1.076137  |
| 6  | -1.594635 | -2.475546 | -0.358863 |
| 6  | -2.726980 | -1.872638 | -1.076310 |
| 6  | -3.429153 | -1.103925 | -0.135175 |
| 6  | -3.388686 | -0.761147 | 2.469660  |
| 1  | -4.298561 | -1.298248 | 2.772811  |
| 1  | -3.655573 | 0.293071  | 2.346473  |
| 1  | -2.667207 | -0.825444 | 3.287135  |
| 6  | -1.079591 | -3.017578 | 2.165376  |
| 1  | -1.209722 | -2.532039 | 3.134312  |
| 1  | -0.005673 | -3.085476 | 1.974749  |
| 1  | -1.468773 | -4.042367 | 2.247770  |
| 6  | -0.637766 | -3.462548 | -0.958338 |
| 1  | -1.093168 | -4.463036 | -0.991598 |
| 1  | 0.279540  | -3.533525 | -0.367496 |
| 1  | -0.366768 | -3.185730 | -1.981408 |
| 6  | -3.003825 | -2.031102 | -2.541046 |
| 1  | -3.464156 | -3.006781 | -2.748860 |
| 1  | -2.084417 | -1.971319 | -3.132922 |
| 1  | -3.683334 | -1.258562 | -2.910991 |
| 6  | -4.645781 | -0.258762 | -0.364855 |
| 1  | -5.542576 | -0.762601 | 0.021640  |

|   |           |           |           |
|---|-----------|-----------|-----------|
| 1 | -4.807574 | -0.058408 | -1.426896 |
| 1 | -4.567256 | 0.704320  | 0.149553  |
| 6 | -2.172402 | 2.869610  | -1.233059 |
| 1 | -2.425235 | 2.437082  | -0.252796 |
| 1 | -1.233414 | 3.421242  | -1.081075 |
| 6 | -3.271655 | 3.851785  | -1.658057 |
| 6 | -3.494416 | 4.986046  | -0.651570 |
| 1 | -4.213709 | 3.302646  | -1.804587 |
| 1 | -3.015689 | 4.278494  | -2.638783 |
| 1 | -4.285027 | 5.669558  | -0.983154 |
| 1 | -3.783505 | 4.592998  | 0.331224  |
| 1 | -2.580001 | 5.575615  | -0.512271 |
| 6 | -1.934057 | 1.736537  | -2.240927 |
| 6 | -0.796029 | 0.765739  | -1.857164 |
| 1 | -1.698810 | 2.188731  | -3.219490 |
| 1 | -2.872647 | 1.183323  | -2.387896 |
| 1 | -0.667818 | 0.042894  | -2.678749 |
| 1 | 0.132065  | 1.342558  | -1.812489 |
| 5 | 0.481444  | 0.299723  | 0.955410  |
| 6 | 2.975297  | 1.633393  | 1.118985  |

**1V-2**

**HF = -1138.8246004 hartree**

|    |           |           |           |
|----|-----------|-----------|-----------|
| 77 | -1.277736 | -0.315439 | -0.338645 |
| 6  | 1.985075  | 0.837727  | 0.322551  |
| 5  | 0.943140  | 1.825778  | 1.256250  |
| 1  | 0.585588  | 1.403528  | 2.314554  |
| 5  | 0.045311  | 2.820849  | 0.110021  |
| 1  | -1.059054 | 3.213287  | 0.346689  |
| 5  | 0.549593  | 2.326126  | -1.526181 |
| 1  | -0.185886 | 2.361699  | -2.469744 |
| 5  | 1.771125  | 1.050364  | -1.352010 |
| 1  | 1.949058  | 0.132134  | -2.083310 |
| 5  | 2.668083  | 2.217258  | 1.096056  |
| 1  | 3.388744  | 2.024721  | 2.030152  |
| 5  | 1.460106  | 3.502587  | 0.952304  |
| 1  | 1.351019  | 4.337018  | 1.802212  |
| 5  | 1.218235  | 3.814896  | -0.785191 |
| 1  | 0.929234  | 4.899669  | -1.198715 |
| 5  | 2.285984  | 2.715727  | -1.697565 |
| 1  | 2.766917  | 2.996235  | -2.755433 |
| 5  | 3.183040  | 1.746548  | -0.530015 |
| 1  | 4.256504  | 1.265668  | -0.704336 |
| 5  | 2.847470  | 3.445679  | -0.164608 |
| 1  | 3.736418  | 4.244496  | -0.123681 |
| 6  | 2.303436  | -0.540718 | 0.949620  |
| 1  | 2.382662  | -0.391881 | 2.032808  |
| 1  | 1.450787  | -1.198062 | 0.771350  |
| 6  | 3.544956  | -1.270961 | 0.482561  |
| 6  | 4.825210  | -0.893916 | 0.923396  |
| 1  | 4.932821  | -0.030619 | 1.572397  |
| 6  | 5.933402  | -1.624164 | 0.509325  |
| 1  | 6.931399  | -1.344624 | 0.839162  |
| 6  | 5.741691  | -2.717699 | -0.338168 |
| 1  | 6.576120  | -3.318640 | -0.690025 |
| 6  | 4.437421  | -3.020987 | -0.722087 |
| 1  | 4.239332  | -3.867108 | -1.380294 |
| 7  | 3.362209  | -2.329747 | -0.324287 |
| 6  | -3.357774 | 0.534527  | 0.086889  |



|   |           |           |           |
|---|-----------|-----------|-----------|
| 6 | -2.699234 | 0.437739  | 1.334630  |
| 6 | -2.266271 | -0.949831 | 1.443181  |
| 6 | -2.982311 | -1.742080 | 0.424603  |
| 6 | -3.589707 | -0.827505 | -0.442153 |
| 6 | -3.917651 | 1.781790  | -0.531606 |
| 1 | -4.970392 | 1.928470  | -0.246595 |
| 1 | -3.873323 | 1.733978  | -1.624253 |
| 1 | -3.349365 | 2.661669  | -0.220737 |
| 6 | -2.504752 | 1.512741  | 2.359216  |
| 1 | -2.550473 | 2.507218  | 1.910487  |
| 1 | -1.533620 | 1.430935  | 2.852600  |
| 1 | -3.285602 | 1.450682  | 3.133113  |
| 6 | -1.560000 | -1.535617 | 2.630890  |
| 1 | -2.273376 | -1.760722 | 3.438539  |
| 1 | -0.812876 | -0.838877 | 3.020806  |
| 1 | -1.046762 | -2.465313 | 2.366643  |
| 6 | -2.934889 | -3.236204 | 0.314332  |
| 1 | -3.558267 | -3.715068 | 1.083452  |
| 1 | -1.912290 | -3.609221 | 0.439339  |
| 1 | -3.290969 | -3.580632 | -0.661479 |
| 6 | -4.355242 | -1.118945 | -1.698564 |
| 1 | -5.435155 | -0.968978 | -1.553192 |
| 1 | -4.203277 | -2.149048 | -2.034091 |
| 1 | -4.040798 | -0.456978 | -2.512642 |
| 6 | -0.214876 | -1.572627 | -1.592517 |
| 1 | -0.768391 | -2.508277 | -1.772987 |
| 1 | 0.802076  | -1.823808 | -1.275126 |
| 1 | -0.112723 | -1.040135 | -2.552432 |
| 5 | 0.328557  | 1.084991  | -0.256286 |

I-2

HF = -1217.3879783 hartree

|    |           |           |           |
|----|-----------|-----------|-----------|
| 77 | -1.330978 | -0.000226 | -0.459712 |
| 6  | 1.995597  | 0.828108  | 0.425595  |
| 5  | 0.995775  | 1.876581  | 1.329255  |
| 1  | 0.487649  | 1.477147  | 2.327429  |
| 5  | 0.332963  | 3.052140  | 0.199858  |
| 1  | -0.725082 | 3.571729  | 0.391795  |
| 5  | 0.940696  | 2.617888  | -1.415188 |
| 1  | 0.349915  | 2.829579  | -2.431087 |
| 5  | 1.953283  | 1.184739  | -1.235741 |
| 1  | 2.113492  | 0.320128  | -2.035599 |
| 5  | 2.764920  | 2.054984  | 1.360067  |
| 1  | 3.359406  | 1.704336  | 2.336125  |
| 5  | 1.736396  | 3.485950  | 1.212923  |
| 1  | 1.641593  | 4.263165  | 2.116967  |
| 5  | 1.707982  | 3.949078  | -0.503275 |
| 1  | 1.592651  | 5.087506  | -0.851723 |
| 5  | 2.711830  | 2.788302  | -1.401523 |
| 1  | 3.320286  | 3.069091  | -2.391547 |
| 5  | 3.365577  | 1.633752  | -0.245520 |
| 1  | 4.381435  | 1.029517  | -0.373891 |
| 5  | 3.210712  | 3.331351  | 0.223750  |
| 1  | 4.183736  | 4.001897  | 0.406319  |
| 6  | 2.127142  | -0.619003 | 0.950038  |
| 1  | 2.197367  | -0.565070 | 2.041556  |
| 1  | 1.205314  | -1.150039 | 0.703569  |
| 6  | 3.284970  | -1.453445 | 0.444223  |
| 6  | 4.568295  | -1.333543 | 1.004068  |

|   |           |           |           |
|---|-----------|-----------|-----------|
| 1 | 4.743381  | -0.597849 | 1.782783  |
| 6 | 5.596621  | -2.144865 | 0.538135  |
| 1 | 6.596652  | -2.061755 | 0.957429  |
| 6 | 5.323311  | -3.061337 | -0.479735 |
| 1 | 6.093926  | -3.714965 | -0.879581 |
| 6 | 4.021710  | -3.115467 | -0.972667 |
| 1 | 3.761569  | -3.817072 | -1.765328 |
| 7 | 3.021492  | -2.345507 | -0.525981 |
| 6 | -3.510865 | -0.289513 | 0.523891  |
| 6 | -2.536086 | 0.179661  | 1.499251  |
| 6 | -1.627577 | -0.910125 | 1.752279  |
| 6 | -1.958398 | -1.965643 | 0.849827  |
| 6 | -3.143423 | -1.593434 | 0.111411  |
| 6 | -4.749517 | 0.455663  | 0.122429  |
| 1 | -5.538646 | 0.323730  | 0.876737  |
| 1 | -5.146756 | 0.103165  | -0.834957 |
| 1 | -4.563764 | 1.528727  | 0.026989  |
| 6 | -2.677871 | 1.415373  | 2.342436  |
| 1 | -3.137414 | 2.232733  | 1.778141  |
| 1 | -1.703099 | 1.770655  | 2.684234  |
| 1 | -3.307292 | 1.229758  | 3.226660  |
| 6 | -0.717731 | -1.039479 | 2.939446  |
| 1 | -1.294356 | -1.375471 | 3.815310  |
| 1 | -0.242672 | -0.092115 | 3.198178  |
| 1 | 0.073596  | -1.775092 | 2.771050  |
| 6 | -1.317219 | -3.324718 | 0.821387  |
| 1 | -1.805936 | -4.005862 | 1.534140  |
| 1 | -0.255540 | -3.278751 | 1.080474  |
| 1 | -1.391901 | -3.789007 | -0.167585 |
| 6 | -3.850867 | -2.462975 | -0.889383 |
| 1 | -4.483886 | -3.220915 | -0.403999 |
| 1 | -3.140668 | -3.002154 | -1.528151 |
| 1 | -4.496589 | -1.873153 | -1.547936 |
| 6 | -0.935315 | -0.384583 | -2.536693 |
| 6 | -0.182096 | -1.301831 | -1.759094 |
| 1 | -0.427628 | 0.448327  | -3.014022 |
| 1 | -1.844421 | -0.713102 | -3.042343 |
| 1 | -0.556766 | -2.317676 | -1.639592 |
| 1 | 0.892791  | -1.219804 | -1.672027 |
| 6 | -2.217110 | 1.710686  | -1.364452 |
| 1 | -2.525876 | 2.405577  | -0.577158 |
| 1 | -1.557857 | 2.244480  | -2.043109 |
| 1 | -3.100449 | 1.369642  | -1.922033 |
| 5 | 0.404915  | 1.316779  | -0.282376 |

**1TS1-2**

**HF = -1217.3332489 hartree**

**$\nu^* = -478.9147 \text{ icm}^{-1}$**

|    |           |           |           |
|----|-----------|-----------|-----------|
| 77 | -1.283193 | -0.194893 | -0.352391 |
| 6  | 2.036836  | 0.845630  | 0.418703  |
| 5  | 1.011913  | 1.849270  | 1.328934  |
| 1  | 0.614088  | 1.434673  | 2.372365  |
| 5  | 0.197192  | 2.922401  | 0.186991  |
| 1  | -0.896933 | 3.361962  | 0.394978  |
| 5  | 0.761420  | 2.465940  | -1.434504 |
| 1  | 0.095321  | 2.590299  | -2.418714 |
| 5  | 1.891258  | 1.120666  | -1.247615 |
| 1  | 2.078230  | 0.225044  | -2.008016 |
| 5  | 2.756501  | 2.167753  | 1.259897  |
| 1  | 3.423086  | 1.910308  | 2.218352  |

S34

|   |           |           |           |
|---|-----------|-----------|-----------|
| 5 | 1.611689  | 3.508080  | 1.109518  |
| 1 | 1.503137  | 4.316326  | 1.984581  |
| 5 | 1.464736  | 3.889749  | -0.621430 |
| 1 | 1.245590  | 4.999566  | -1.011269 |
| 5 | 2.513265  | 2.767242  | -1.522563 |
| 1 | 3.048382  | 3.050223  | -2.554019 |
| 5 | 3.310637  | 1.717562  | -0.353960 |
| 1 | 4.363304  | 1.185501  | -0.507417 |
| 5 | 3.045757  | 3.421304  | 0.050342  |
| 1 | 3.970371  | 4.172416  | 0.154818  |
| 6 | 2.274730  | -0.564520 | 1.002661  |
| 1 | 2.363216  | -0.455738 | 2.089351  |
| 1 | 1.381033  | -1.159510 | 0.802900  |
| 6 | 3.475720  | -1.341402 | 0.507615  |
| 6 | 4.760613  | -1.099815 | 1.023669  |
| 1 | 4.900083  | -0.313070 | 1.758399  |
| 6 | 5.834040  | -1.859393 | 0.572797  |
| 1 | 6.835101  | -1.682178 | 0.959309  |
| 6 | 5.603873  | -2.848177 | -0.386461 |
| 1 | 6.410022  | -3.466931 | -0.771686 |
| 6 | 4.298089  | -3.021480 | -0.839351 |
| 1 | 4.070619  | -3.782846 | -1.585753 |
| 7 | 3.255653  | -2.300983 | -0.407477 |
| 6 | -3.491388 | 0.190237  | 0.583271  |
| 6 | -2.504077 | 0.397248  | 1.575071  |
| 6 | -1.745309 | -0.846984 | 1.703867  |
| 6 | -2.403357 | -1.838563 | 0.860277  |
| 6 | -3.448215 | -1.200151 | 0.154192  |
| 6 | -4.486823 | 1.196706  | 0.085948  |
| 1 | -5.511028 | 0.925848  | 0.379988  |
| 1 | -4.476201 | 1.272968  | -1.009662 |
| 1 | -4.278378 | 2.193677  | 0.483047  |
| 6 | -2.370994 | 1.597849  | 2.463663  |
| 1 | -2.772419 | 2.499287  | 1.993194  |
| 1 | -1.328240 | 1.802071  | 2.707741  |
| 1 | -2.916454 | 1.437296  | 3.406792  |
| 6 | -0.836673 | -1.183431 | 2.853324  |
| 1 | -1.420474 | -1.460075 | 3.745703  |
| 1 | -0.201250 | -0.336211 | 3.117690  |
| 1 | -0.181403 | -2.026811 | 2.613911  |
| 6 | -2.041811 | -3.295318 | 0.812538  |
| 1 | -2.551639 | -3.855152 | 1.610433  |
| 1 | -0.965265 | -3.440324 | 0.943146  |
| 1 | -2.322161 | -3.755336 | -0.140980 |
| 6 | -4.398311 | -1.821848 | -0.828962 |
| 1 | -5.377986 | -2.033221 | -0.373494 |
| 1 | -4.012243 | -2.768971 | -1.220522 |
| 1 | -4.584989 | -1.162650 | -1.685755 |
| 6 | -0.662547 | -0.615655 | -2.613884 |
| 6 | -0.155147 | -1.476081 | -1.544985 |
| 1 | 0.082583  | 0.027746  | -3.070492 |
| 1 | -1.325708 | -1.088977 | -3.338415 |
| 1 | -0.575745 | -2.487005 | -1.517988 |
| 1 | 0.922206  | -1.487492 | -1.403727 |
| 6 | -2.007734 | 0.818996  | -2.414226 |
| 1 | -2.069136 | 1.707719  | -1.786980 |
| 1 | -1.657052 | 1.167317  | -3.385441 |
| 1 | -2.978866 | 0.334936  | -2.528721 |

5 0.380516 1.181598 -0.229519

**INT1-2** **HF = -1217.3892998 hartree**

|    |           |           |           |
|----|-----------|-----------|-----------|
| 77 | 1.262732  | -0.222070 | 0.123924  |
| 6  | -2.054353 | 0.880502  | -0.309002 |
| 5  | -1.059254 | 2.017372  | -1.112479 |
| 1  | -0.700113 | 1.742579  | -2.215918 |
| 5  | -0.184327 | 2.885134  | 0.147947  |
| 1  | 0.905345  | 3.344068  | -0.035678 |
| 5  | -0.656655 | 2.166958  | 1.710102  |
| 1  | 0.084516  | 2.108872  | 2.647935  |
| 5  | -1.837627 | 0.884526  | 1.374848  |
| 1  | -1.990307 | -0.128390 | 1.974022  |
| 5  | -2.793029 | 2.323329  | -0.897904 |
| 1  | -3.513051 | 2.226813  | -1.847072 |
| 5  | -1.629854 | 3.620706  | -0.593051 |
| 1  | -1.554469 | 4.561285  | -1.328063 |
| 5  | -1.381941 | 3.714567  | 1.169385  |
| 1  | -1.125491 | 4.746877  | 1.716514  |
| 5  | -2.404455 | 2.471505  | 1.936772  |
| 1  | -2.886151 | 2.596695  | 3.023497  |
| 5  | -3.276866 | 1.631207  | 0.657140  |
| 1  | -4.330649 | 1.093274  | 0.773606  |
| 5  | -3.004002 | 3.372069  | 0.513211  |
| 1  | -3.919278 | 4.138559  | 0.578705  |
| 6  | -2.339232 | -0.426311 | -1.087225 |
| 1  | -2.407397 | -0.165571 | -2.149706 |
| 1  | -1.478854 | -1.086669 | -0.964058 |
| 6  | -3.575464 | -1.213865 | -0.709000 |
| 6  | -4.851113 | -0.829306 | -1.155855 |
| 1  | -4.958358 | 0.072385  | -1.750633 |
| 6  | -5.956769 | -1.598117 | -0.810511 |
| 1  | -6.951944 | -1.312246 | -1.143451 |
| 6  | -5.766042 | -2.737194 | -0.025334 |
| 1  | -6.598742 | -3.368243 | 0.273886  |
| 6  | -4.465283 | -3.045986 | 0.366724  |
| 1  | -4.268801 | -3.927544 | 0.977084  |
| 7  | -3.392112 | -2.317906 | 0.034440  |
| 6  | 3.290500  | 0.653658  | -0.468802 |
| 6  | 2.476131  | 0.725071  | -1.625547 |
| 6  | 1.998231  | -0.630119 | -1.845837 |
| 6  | 2.815642  | -1.550392 | -1.027504 |
| 6  | 3.578583  | -0.761717 | -0.161344 |
| 6  | 3.945272  | 1.817477  | 0.215626  |
| 1  | 4.936144  | 2.023945  | -0.216435 |
| 1  | 4.084393  | 1.623552  | 1.283876  |
| 1  | 3.334116  | 2.718751  | 0.120447  |
| 6  | 2.215561  | 1.931169  | -2.474920 |
| 1  | 2.123375  | 2.838858  | -1.873400 |
| 1  | 1.289784  | 1.831712  | -3.044376 |
| 1  | 3.038567  | 2.078482  | -3.191729 |
| 6  | 1.136848  | -1.063847 | -2.995929 |
| 1  | 1.743509  | -1.209217 | -3.902915 |
| 1  | 0.371766  | -0.313788 | -3.213753 |
| 1  | 0.629033  | -2.008231 | -2.777350 |
| 6  | 2.740854  | -3.045719 | -1.098133 |
| 1  | 3.184603  | -3.424716 | -2.029863 |
| 1  | 1.701263  | -3.390906 | -1.062422 |

|   |           |           |           |
|---|-----------|-----------|-----------|
| 1 | 3.269453  | -3.515496 | -0.263285 |
| 6 | 4.544978  | -1.219734 | 0.889935  |
| 1 | 5.584647  | -1.113101 | 0.545903  |
| 1 | 4.387952  | -2.269418 | 1.154812  |
| 1 | 4.444684  | -0.633095 | 1.808338  |
| 6 | 0.444651  | -1.375961 | 2.892704  |
| 6 | 0.387146  | -1.660255 | 1.374408  |
| 1 | -0.090814 | -0.449381 | 3.120062  |
| 1 | -0.102966 | -2.178796 | 3.414757  |
| 1 | 0.915833  | -2.612404 | 1.187344  |
| 1 | -0.661759 | -1.828164 | 1.106258  |
| 6 | 1.854048  | -1.292198 | 3.489843  |
| 1 | 2.393392  | -0.420268 | 3.100667  |
| 1 | 1.818927  | -1.201611 | 4.584142  |
| 1 | 2.446931  | -2.185888 | 3.248618  |
| 5 | -0.403158 | 1.108269  | 0.290153  |

II-2

HF = -1295.9510211 hartree

|    |           |           |           |
|----|-----------|-----------|-----------|
| 77 | -1.167650 | -0.209657 | -0.267865 |
| 6  | 2.141454  | 0.888485  | 0.476194  |
| 5  | 1.116631  | 1.646979  | 1.608762  |
| 1  | 0.763821  | 1.034002  | 2.564399  |
| 5  | 0.209602  | 2.878243  | 0.736706  |
| 1  | -0.881934 | 3.212643  | 1.087756  |
| 5  | 0.708601  | 2.772246  | -0.970673 |
| 1  | 0.004444  | 3.048639  | -1.894911 |
| 5  | 1.896370  | 1.476440  | -1.097815 |
| 1  | 2.082795  | 0.772664  | -2.037282 |
| 5  | 2.844836  | 2.056675  | 1.531500  |
| 1  | 3.567292  | 1.650375  | 2.392802  |
| 5  | 1.642137  | 3.342009  | 1.693352  |
| 1  | 1.541686  | 3.957340  | 2.713920  |
| 5  | 1.391075  | 4.045393  | 0.079305  |
| 1  | 1.105811  | 5.196675  | -0.074712 |
| 5  | 2.436475  | 3.173679  | -1.065784 |
| 1  | 2.907086  | 3.676023  | -2.043047 |
| 5  | 3.333118  | 1.960017  | -0.161636 |
| 1  | 4.395837  | 1.520517  | -0.463067 |
| 5  | 3.021232  | 3.535227  | 0.581161  |
| 1  | 3.920095  | 4.294587  | 0.792457  |
| 6  | 2.501216  | -0.586983 | 0.756147  |
| 1  | 2.633264  | -0.690284 | 1.837931  |
| 1  | 1.647193  | -1.203034 | 0.469511  |
| 6  | 3.727687  | -1.159548 | 0.078204  |
| 6  | 5.012606  | -0.956672 | 0.609737  |
| 1  | 5.131930  | -0.341120 | 1.495942  |
| 6  | 6.111262  | -1.531683 | -0.018475 |
| 1  | 7.113038  | -1.381405 | 0.377307  |
| 6  | 5.904733  | -2.299415 | -1.166739 |
| 1  | 6.731173  | -2.767406 | -1.694842 |
| 6  | 4.596422  | -2.451987 | -1.620047 |
| 1  | 4.387842  | -3.045526 | -2.510149 |
| 7  | 3.529693  | -1.909808 | -1.019023 |
| 6  | -3.182196 | -0.898437 | 0.931975  |
| 6  | -2.116890 | -0.503483 | 1.835824  |
| 6  | -1.090186 | -1.510903 | 1.752545  |
| 6  | -1.468588 | -2.423957 | 0.719763  |
| 6  | -2.775031 | -2.059633 | 0.228955  |

|   |           |           |           |
|---|-----------|-----------|-----------|
| 6 | -4.540951 | -0.262452 | 0.911738  |
| 1 | -5.074881 | -0.492327 | 1.845129  |
| 1 | -5.155698 | -0.626459 | 0.083784  |
| 1 | -4.485384 | 0.827636  | 0.835323  |
| 6 | -2.258049 | 0.532051  | 2.915738  |
| 1 | -2.779001 | 1.422548  | 2.549533  |
| 1 | -1.282838 | 0.860511  | 3.280718  |
| 1 | -2.830795 | 0.142074  | 3.771912  |
| 6 | -0.012313 | -1.756852 | 2.768978  |
| 1 | -0.438266 | -2.265116 | 3.648032  |
| 1 | 0.449046  | -0.830114 | 3.113848  |
| 1 | 0.779062  | -2.400545 | 2.375019  |
| 6 | -0.734351 | -3.683022 | 0.351947  |
| 1 | 0.350722  | -3.555198 | 0.407991  |
| 1 | -0.974887 | -4.008522 | -0.665701 |
| 1 | -1.008251 | -4.508376 | 1.026006  |
| 6 | -3.548083 | -2.814484 | -0.816238 |
| 1 | -4.393445 | -2.228771 | -1.190241 |
| 1 | -3.950274 | -3.762668 | -0.429497 |
| 1 | -2.919866 | -3.062138 | -1.681243 |
| 6 | -2.329343 | 1.521446  | -0.808525 |
| 1 | -2.759636 | 1.850481  | 0.146610  |
| 1 | -1.684294 | 2.328284  | -1.142350 |
| 6 | -3.444872 | 1.338860  | -1.846324 |
| 6 | -4.381764 | 2.558209  | -1.907583 |
| 1 | -4.043458 | 0.439528  | -1.649557 |
| 1 | -3.006335 | 1.197300  | -2.841300 |
| 1 | -5.144056 | 2.445382  | -2.691322 |
| 1 | -4.903484 | 2.710300  | -0.953471 |
| 1 | -3.815692 | 3.473956  | -2.117458 |
| 6 | -0.901332 | -0.275220 | -2.401301 |
| 6 | 0.033739  | -1.157033 | -1.798995 |
| 1 | -0.558298 | 0.673483  | -2.804708 |
| 1 | -1.785194 | -0.684124 | -2.890128 |
| 1 | -0.182478 | -2.224154 | -1.801707 |
| 1 | 1.089740  | -0.926549 | -1.774769 |
| 5 | 0.437269  | 1.260571  | -0.020237 |

**1TS2-2**

**HF = -1295.895414 hartree**

$v^* = -447.7705 \text{ icm}^{-1}$

|    |           |           |           |
|----|-----------|-----------|-----------|
| 77 | 1.132272  | -0.296363 | 0.063350  |
| 6  | -2.214938 | 0.780654  | -0.457859 |
| 5  | -1.303208 | 1.514485  | -1.687303 |
| 1  | -1.063248 | 0.866903  | -2.656539 |
| 5  | -0.318589 | 2.764032  | -0.927579 |
| 1  | 0.741497  | 3.103674  | -1.365301 |
| 5  | -0.664151 | 2.703051  | 0.808433  |
| 1  | 0.120860  | 3.045328  | 1.637673  |
| 5  | -1.826432 | 1.398004  | 1.080192  |
| 1  | -1.914594 | 0.703996  | 2.044008  |
| 5  | -3.015623 | 1.927904  | -1.464512 |
| 1  | -3.811360 | 1.503372  | -2.249005 |
| 5  | -1.836083 | 3.208232  | -1.764692 |
| 1  | -1.832980 | 3.801208  | -2.803728 |
| 5  | -1.446132 | 3.946104  | -0.198233 |
| 1  | -1.149992 | 5.100398  | -0.091398 |
| 5  | -2.378536 | 3.094872  | 1.060360  |
| 1  | -2.757844 | 3.621000  | 2.065142  |
| 5  | -3.347666 | 1.859037  | 0.268819  |

|   |           |           |           |
|---|-----------|-----------|-----------|
| 1 | -4.379126 | 1.424121  | 0.670490  |
| 5 | -3.112113 | 3.422023  | -0.533263 |
| 1 | -4.028183 | 4.176902  | -0.678070 |
| 6 | -2.586751 | -0.699133 | -0.710554 |
| 1 | -2.761909 | -0.805941 | -1.786457 |
| 1 | -1.721855 | -1.315027 | -0.459893 |
| 6 | -3.793315 | -1.253624 | 0.016439  |
| 6 | -5.092956 | -1.049170 | -0.478721 |
| 1 | -5.233508 | -0.448529 | -1.371950 |
| 6 | -6.177119 | -1.600498 | 0.194167  |
| 1 | -7.189285 | -1.447896 | -0.173576 |
| 6 | -5.942479 | -2.347562 | 1.350694  |
| 1 | -6.756340 | -2.797495 | 1.913138  |
| 6 | -4.622020 | -2.502363 | 1.766672  |
| 1 | -4.391485 | -3.079757 | 2.662266  |
| 7 | -3.569624 | -1.982132 | 1.123235  |
| 6 | 3.196800  | -0.130665 | -1.160824 |
| 6 | 2.089821  | -0.060318 | -2.045263 |
| 6 | 1.328112  | -1.299351 | -1.897375 |
| 6 | 2.091497  | -2.163985 | -1.006222 |
| 6 | 3.211784  | -1.444854 | -0.536204 |
| 6 | 4.253676  | 0.919935  | -0.977901 |
| 1 | 5.149965  | 0.703408  | -1.578303 |
| 1 | 4.578866  | 0.991029  | 0.067321  |
| 1 | 3.886715  | 1.907037  | -1.273603 |
| 6 | 1.884906  | 0.977966  | -3.107983 |
| 1 | 2.294357  | 1.947480  | -2.814166 |
| 1 | 0.828942  | 1.129760  | -3.330104 |
| 1 | 2.388023  | 0.664810  | -4.036262 |
| 6 | 0.277997  | -1.797318 | -2.851227 |
| 1 | 0.742003  | -2.254723 | -3.739636 |
| 1 | -0.369423 | -0.987083 | -3.190286 |
| 1 | -0.358653 | -2.556000 | -2.384433 |
| 6 | 1.745014  | -3.589746 | -0.689096 |
| 1 | 0.661591  | -3.732289 | -0.629798 |
| 1 | 2.173492  | -3.910465 | 0.266702  |
| 1 | 2.124133  | -4.272111 | -1.464178 |
| 6 | 4.287237  | -1.958001 | 0.379477  |
| 1 | 4.720370  | -1.154985 | 0.984786  |
| 1 | 5.114958  | -2.413691 | -0.185460 |
| 1 | 3.907967  | -2.721272 | 1.067789  |
| 6 | 1.994762  | 1.012443  | 2.007575  |
| 1 | 2.459440  | 1.448878  | 1.123160  |
| 1 | 1.269715  | 1.735017  | 2.363545  |
| 6 | 3.081615  | 0.741700  | 3.045947  |
| 6 | 3.916402  | 1.999452  | 3.336976  |
| 1 | 3.749371  | -0.063043 | 2.707376  |
| 1 | 2.634637  | 0.393661  | 3.987927  |
| 1 | 4.676568  | 1.802323  | 4.104791  |
| 1 | 4.431447  | 2.354466  | 2.436053  |
| 1 | 3.280818  | 2.818444  | 3.693948  |
| 6 | 0.880196  | -0.629742 | 2.388859  |
| 6 | 0.014235  | -1.361969 | 1.467098  |
| 1 | 0.365020  | -0.014945 | 3.124796  |
| 1 | 1.694494  | -1.209407 | 2.815875  |
| 1 | 0.232168  | -2.430390 | 1.376021  |
| 1 | -1.050115 | -1.176720 | 1.557334  |
| 5 | -0.471847 | 1.158323  | -0.113555 |

INT2-2

HF = -1295.9570904 hartree

|    |           |           |           |
|----|-----------|-----------|-----------|
| 77 | -1.193156 | -0.097095 | -0.305566 |
| 6  | 2.202927  | -0.890613 | 0.303551  |
| 5  | 1.347208  | -2.375600 | 0.391746  |
| 1  | 1.124827  | -2.944604 | -0.635075 |
| 5  | 0.341386  | -2.281055 | 1.835354  |
| 1  | -0.697323 | -2.864112 | 1.917751  |
| 5  | 0.576470  | -0.663963 | 2.541604  |
| 1  | -0.285863 | -0.082455 | 3.132835  |
| 5  | 1.757604  | 0.198880  | 1.533182  |
| 1  | 1.792068  | 1.366878  | 1.321058  |
| 5  | 3.046576  | -2.268923 | 0.898734  |
| 1  | 3.884867  | -2.751808 | 0.197849  |
| 5  | 1.888863  | -3.157354 | 1.898399  |
| 1  | 1.940041  | -4.349504 | 1.979860  |
| 5  | 1.411266  | -2.088775 | 3.240390  |
| 1  | 1.110212  | -2.519202 | 4.315156  |
| 5  | 2.284056  | -0.545022 | 3.056537  |
| 1  | 2.617080  | 0.135037  | 3.981304  |
| 5  | 3.301764  | -0.672966 | 1.621158  |
| 1  | 4.316372  | -0.083051 | 1.430131  |
| 5  | 3.095377  | -2.089076 | 2.659294  |
| 1  | 4.014123  | -2.512874 | 3.296342  |
| 6  | 2.565526  | -0.413850 | -1.123850 |
| 1  | 2.667444  | -1.308857 | -1.748024 |
| 1  | 1.730153  | 0.166554  | -1.517211 |
| 6  | 3.818924  | 0.421265  | -1.280887 |
| 6  | 5.087934  | -0.177845 | -1.355725 |
| 1  | 5.175579  | -1.255101 | -1.256935 |
| 6  | 6.212248  | 0.620823  | -1.532056 |
| 1  | 7.202241  | 0.173776  | -1.587853 |
| 6  | 6.046405  | 2.003765  | -1.631485 |
| 1  | 6.893628  | 2.670607  | -1.768298 |
| 6  | 4.750588  | 2.509889  | -1.550819 |
| 1  | 4.573643  | 3.583016  | -1.626335 |
| 7  | 3.660252  | 1.751164  | -1.387816 |
| 6  | -3.167340 | -1.265456 | 0.091196  |
| 6  | -2.372323 | -2.049503 | -0.765868 |
| 6  | -2.048577 | -1.194743 | -1.911054 |
| 6  | -2.947846 | -0.029124 | -1.881675 |
| 6  | -3.553935 | -0.027258 | -0.619190 |
| 6  | -3.694204 | -1.655182 | 1.440605  |
| 1  | -4.728369 | -2.025575 | 1.373767  |
| 1  | -3.692327 | -0.800744 | 2.125129  |
| 1  | -3.075871 | -2.433301 | 1.893885  |
| 6  | -1.969815 | -3.483720 | -0.608954 |
| 1  | -2.143112 | -3.839491 | 0.408332  |
| 1  | -0.910135 | -3.636559 | -0.826681 |
| 1  | -2.553534 | -4.116437 | -1.295203 |
| 6  | -1.275887 | -1.654822 | -3.112808 |
| 1  | -1.917078 | -2.239052 | -3.790891 |
| 1  | -0.436627 | -2.286964 | -2.809444 |
| 1  | -0.873558 | -0.807557 | -3.676376 |
| 6  | -3.071017 | 0.990110  | -2.974375 |
| 1  | -2.088242 | 1.278768  | -3.363944 |
| 1  | -3.562666 | 1.902208  | -2.622322 |
| 1  | -3.657275 | 0.601085  | -3.819664 |



|   |           |           |           |
|---|-----------|-----------|-----------|
| 6 | -4.494996 | 0.994282  | -0.052671 |
| 1 | -4.229870 | 1.245919  | 0.979672  |
| 1 | -5.528295 | 0.617426  | -0.040829 |
| 1 | -4.484025 | 1.921551  | -0.632581 |
| 6 | -1.054183 | 3.073441  | 1.310912  |
| 1 | -1.552797 | 2.188434  | 1.732674  |
| 1 | -0.020078 | 3.030451  | 1.677444  |
| 6 | -1.732521 | 4.343891  | 1.840099  |
| 6 | -1.732175 | 4.439229  | 3.370352  |
| 1 | -2.769508 | 4.386423  | 1.472157  |
| 1 | -1.227679 | 5.227014  | 1.419953  |
| 1 | -2.220360 | 5.357785  | 3.721453  |
| 1 | -2.258415 | 3.587202  | 3.818515  |
| 1 | -0.708540 | 4.430891  | 3.764047  |
| 6 | -1.050398 | 2.970674  | -0.220835 |
| 6 | -0.293933 | 1.746389  | -0.784474 |
| 1 | -0.587863 | 3.889338  | -0.624529 |
| 1 | -2.091837 | 2.979061  | -0.579270 |
| 1 | -0.310690 | 1.820654  | -1.884652 |
| 1 | 0.754597  | 1.830722  | -0.491468 |
| 5 | 0.492204  | -0.845183 | 0.759932  |

**2V**

**HF = -1156.7310178 hartree**

|   |           |           |           |
|---|-----------|-----------|-----------|
| 6 | 0.224822  | 1.048354  | -0.299508 |
| 6 | 1.788665  | 0.896720  | 0.357436  |
| 5 | 0.612931  | 1.813199  | 1.184067  |
| 1 | 0.189730  | 1.363177  | 2.196089  |
| 5 | -0.313339 | 2.663475  | -0.045368 |
| 1 | -1.475353 | 2.835086  | 0.127673  |
| 5 | 0.299486  | 2.134465  | -1.614200 |
| 1 | -0.433858 | 1.944311  | -2.532860 |
| 5 | 1.617988  | 0.987756  | -1.331403 |
| 1 | 1.828897  | 0.029307  | -1.984501 |
| 5 | 2.299287  | 2.364998  | 1.077579  |
| 1 | 2.972534  | 2.274065  | 2.053067  |
| 5 | 0.978786  | 3.514939  | 0.818074  |
| 1 | 0.734182  | 4.364518  | 1.614286  |
| 5 | 0.787154  | 3.719612  | -0.948489 |
| 1 | 0.399325  | 4.733497  | -1.435267 |
| 5 | 1.989628  | 2.671642  | -1.758016 |
| 1 | 2.470028  | 2.926202  | -2.815502 |
| 5 | 2.925384  | 1.856152  | -0.497518 |
| 1 | 4.030128  | 1.442819  | -0.605162 |
| 5 | 2.410521  | 3.535432  | -0.248266 |
| 1 | 3.212652  | 4.413744  | -0.220830 |
| 6 | 2.141138  | -0.434456 | 1.048003  |
| 1 | 2.262215  | -0.221746 | 2.114669  |
| 1 | 1.283742  | -1.101291 | 0.936504  |
| 6 | 3.376110  | -1.157320 | 0.547831  |
| 6 | 4.646474  | -0.857348 | 1.057684  |
| 1 | 4.760714  | -0.077594 | 1.804855  |
| 6 | 5.750006  | -1.564584 | 0.587034  |
| 1 | 6.745144  | -1.348056 | 0.966000  |
| 6 | 5.552170  | -2.553614 | -0.376481 |
| 1 | 6.380889  | -3.132341 | -0.773070 |
| 6 | 4.250775  | -2.787096 | -0.819813 |
| 1 | 4.050533  | -3.553260 | -1.566921 |
| 7 | 3.183252  | -2.115074 | -0.372350 |

|    |           |           |           |
|----|-----------|-----------|-----------|
| 6  | -3.660554 | 0.270545  | 0.112052  |
| 6  | -2.940774 | 0.267784  | 1.304081  |
| 6  | -2.248221 | -1.025046 | 1.381807  |
| 6  | -2.780036 | -1.889409 | 0.326463  |
| 6  | -3.542246 | -1.062861 | -0.519972 |
| 6  | -4.460130 | 1.393006  | -0.475347 |
| 1  | -5.536038 | 1.180429  | -0.410989 |
| 1  | -4.223348 | 1.536230  | -1.535625 |
| 1  | -4.270132 | 2.338661  | 0.036926  |
| 6  | -2.877280 | 1.344068  | 2.344449  |
| 1  | -3.296989 | 2.284339  | 1.979477  |
| 1  | -1.852900 | 1.544596  | 2.667675  |
| 1  | -3.450456 | 1.045390  | 3.233146  |
| 6  | -1.470620 | -1.496224 | 2.572470  |
| 1  | -2.158762 | -1.817331 | 3.368374  |
| 1  | -0.843884 | -0.698387 | 2.979573  |
| 1  | -0.828371 | -2.345629 | 2.324963  |
| 6  | -2.563193 | -3.368691 | 0.219213  |
| 1  | -3.263063 | -3.901680 | 0.877336  |
| 1  | -1.548873 | -3.653745 | 0.513138  |
| 1  | -2.728295 | -3.731167 | -0.798958 |
| 6  | -4.273943 | -1.465967 | -1.765835 |
| 1  | -5.335508 | -1.652791 | -1.551089 |
| 1  | -3.857303 | -2.377810 | -2.201865 |
| 1  | -4.231261 | -0.680832 | -2.527844 |
| 6  | -0.246905 | -1.662061 | -1.545978 |
| 1  | -0.787407 | -2.606288 | -1.665303 |
| 1  | 0.764409  | -1.851234 | -1.183441 |
| 1  | -0.180772 | -1.149410 | -2.518576 |
| 45 | -1.380044 | -0.338520 | -0.452785 |

III

HF = -1235.2786173 hartree

|   |           |           |           |
|---|-----------|-----------|-----------|
| 6 | 0.284588  | 1.373211  | -0.314680 |
| 6 | 1.788634  | 0.868490  | 0.444727  |
| 5 | 0.706303  | 1.883764  | 1.278115  |
| 1 | 0.119476  | 1.448865  | 2.204952  |
| 5 | 0.052921  | 3.023656  | 0.111134  |
| 1 | -1.058902 | 3.410988  | 0.248455  |
| 5 | 0.721663  | 2.582511  | -1.458328 |
| 1 | 0.114475  | 2.670256  | -2.472091 |
| 5 | 1.759552  | 1.180980  | -1.221021 |
| 1 | 1.876923  | 0.295064  | -1.991714 |
| 5 | 2.469127  | 2.127753  | 1.374372  |
| 1 | 3.013464  | 1.804728  | 2.380911  |
| 5 | 1.393997  | 3.517672  | 1.166360  |
| 1 | 1.223008  | 4.299044  | 2.046973  |
| 5 | 1.413714  | 3.954306  | -0.561198 |
| 1 | 1.254291  | 5.069878  | -0.942446 |
| 5 | 2.478837  | 2.800063  | -1.406137 |
| 1 | 3.087012  | 3.071146  | -2.391592 |
| 5 | 3.136208  | 1.692856  | -0.202573 |
| 1 | 4.152987  | 1.092505  | -0.297027 |
| 5 | 2.905072  | 3.397954  | 0.222251  |
| 1 | 3.842652  | 4.103512  | 0.419202  |
| 6 | 1.886714  | -0.573847 | 0.966668  |
| 1 | 1.940412  | -0.521538 | 2.057588  |
| 1 | 0.959125  | -1.087650 | 0.704808  |
| 6 | 3.049796  | -1.401230 | 0.455936  |

|    |           |           |           |
|----|-----------|-----------|-----------|
| 6  | 4.268461  | -1.440774 | 1.146073  |
| 1  | 4.398989  | -0.852750 | 2.049638  |
| 6  | 5.303604  | -2.229381 | 0.649758  |
| 1  | 6.258732  | -2.272826 | 1.166017  |
| 6  | 5.090788  | -2.958460 | -0.520161 |
| 1  | 5.867197  | -3.586731 | -0.945869 |
| 6  | 3.842879  | -2.863589 | -1.134719 |
| 1  | 3.632520  | -3.420045 | -2.046481 |
| 7  | 2.839941  | -2.112103 | -0.663853 |
| 6  | -3.553345 | -0.338733 | 0.371646  |
| 6  | -2.685813 | 0.103969  | 1.436155  |
| 6  | -1.773750 | -0.982339 | 1.734285  |
| 6  | -1.978107 | -2.002658 | 0.780349  |
| 6  | -3.066058 | -1.589693 | -0.098271 |
| 6  | -4.828583 | 0.331366  | -0.042809 |
| 1  | -5.636499 | 0.035177  | 0.640480  |
| 1  | -5.136201 | 0.048377  | -1.053186 |
| 1  | -4.755990 | 1.421315  | -0.007070 |
| 6  | -2.932285 | 1.301739  | 2.307047  |
| 1  | -3.316479 | 2.148015  | 1.729752  |
| 1  | -2.019016 | 1.633363  | 2.806196  |
| 1  | -3.673670 | 1.071943  | 3.085896  |
| 6  | -0.931684 | -1.094145 | 2.971021  |
| 1  | -1.562621 | -1.397151 | 3.818814  |
| 1  | -0.461302 | -0.146968 | 3.242691  |
| 1  | -0.146659 | -1.847710 | 2.866550  |
| 6  | -1.332964 | -3.359469 | 0.782436  |
| 1  | -1.867015 | -4.039094 | 1.461558  |
| 1  | -0.290455 | -3.320350 | 1.111927  |
| 1  | -1.348948 | -3.823673 | -0.207903 |
| 6  | -3.711021 | -2.456335 | -1.143012 |
| 1  | -4.396513 | -3.182083 | -0.683891 |
| 1  | -2.974321 | -3.031127 | -1.714324 |
| 1  | -4.291559 | -1.863629 | -1.855846 |
| 6  | -0.953852 | -0.421935 | -2.667518 |
| 6  | -0.315125 | -1.391773 | -1.915146 |
| 1  | -0.403275 | 0.428749  | -3.052538 |
| 1  | -1.907781 | -0.625311 | -3.145986 |
| 1  | -0.788454 | -2.357987 | -1.773585 |
| 1  | 0.743526  | -1.358261 | -1.686562 |
| 6  | -2.410876 | 1.597418  | -1.508346 |
| 1  | -2.772153 | 2.282030  | -0.738892 |
| 1  | -1.746918 | 2.128255  | -2.182052 |
| 1  | -3.248041 | 1.169982  | -2.065711 |
| 45 | -1.422235 | 0.005508  | -0.508093 |

**2TS1**

**HF = -1235.2478211 hartree**

$\nu^* = -428.9979 \text{ icm}^{-1}$

|   |           |          |           |
|---|-----------|----------|-----------|
| 6 | 0.293461  | 1.219634 | -0.287246 |
| 6 | 1.840856  | 0.878842 | 0.444446  |
| 5 | 0.711864  | 1.838106 | 1.269507  |
| 1 | 0.209076  | 1.389397 | 2.238398  |
| 5 | -0.077191 | 2.857436 | 0.072604  |
| 1 | -1.223996 | 3.137727 | 0.213581  |
| 5 | 0.582892  | 2.409294 | -1.494881 |
| 1 | -0.076356 | 2.400218 | -2.478328 |
| 5 | 1.744565  | 1.109456 | -1.231849 |
| 1 | 1.918514  | 0.194103 | -1.957306 |
| 5 | 2.444616  | 2.234668 | 1.294687  |

S43

|   |           |           |           |
|---|-----------|-----------|-----------|
| 1 | 3.045143  | 2.008266  | 2.295632  |
| 5 | 1.246738  | 3.517164  | 1.062609  |
| 1 | 1.035285  | 4.321598  | 1.913438  |
| 5 | 1.178888  | 3.872691  | -0.682393 |
| 1 | 0.913583  | 4.952134  | -1.106988 |
| 5 | 2.315538  | 2.773497  | -1.511110 |
| 1 | 2.870463  | 3.050577  | -2.526202 |
| 5 | 3.099267  | 1.779859  | -0.281091 |
| 1 | 4.161046  | 1.263406  | -0.380474 |
| 5 | 2.735935  | 3.481775  | 0.074198  |
| 1 | 3.614591  | 4.272502  | 0.209256  |
| 6 | 2.047971  | -0.527694 | 1.030050  |
| 1 | 2.124175  | -0.419805 | 2.115972  |
| 1 | 1.146354  | -1.106586 | 0.815704  |
| 6 | 3.249834  | -1.300159 | 0.524509  |
| 6 | 4.489305  | -1.216342 | 1.172358  |
| 1 | 4.605423  | -0.572783 | 2.039361  |
| 6 | 5.562224  | -1.957560 | 0.683222  |
| 1 | 6.533415  | -1.906066 | 1.167889  |
| 6 | 5.365595  | -2.763946 | -0.437649 |
| 1 | 6.171014  | -3.360121 | -0.855709 |
| 6 | 4.095389  | -2.789771 | -1.012479 |
| 1 | 3.896881  | -3.409770 | -1.885179 |
| 7 | 3.056743  | -2.084595 | -0.548244 |
| 6 | -3.624833 | -0.000565 | 0.492345  |
| 6 | -2.725306 | 0.270431  | 1.536584  |
| 6 | -1.861189 | -0.901915 | 1.699881  |
| 6 | -2.314363 | -1.910293 | 0.787053  |
| 6 | -3.334329 | -1.331879 | -0.026888 |
| 6 | -4.723206 | 0.884060  | -0.014486 |
| 1 | -5.701323 | 0.400805  | 0.107400  |
| 1 | -4.611593 | 1.109957  | -1.083459 |
| 1 | -4.754372 | 1.836552  | 0.519979  |
| 6 | -2.746447 | 1.458674  | 2.451966  |
| 1 | -3.284654 | 2.302386  | 2.012490  |
| 1 | -1.741037 | 1.804205  | 2.699070  |
| 1 | -3.245517 | 1.200868  | 3.397013  |
| 6 | -0.989480 | -1.161144 | 2.895480  |
| 1 | -1.607830 | -1.480737 | 3.747126  |
| 1 | -0.441405 | -0.270272 | 3.208845  |
| 1 | -0.262651 | -1.955842 | 2.705253  |
| 6 | -1.864551 | -3.342979 | 0.772012  |
| 1 | -2.416630 | -3.922170 | 1.525221  |
| 1 | -0.798723 | -3.442137 | 0.997759  |
| 1 | -2.045631 | -3.820030 | -0.195648 |
| 6 | -4.162144 | -2.042313 | -1.060561 |
| 1 | -5.085750 | -2.441600 | -0.618216 |
| 1 | -3.624745 | -2.885436 | -1.505384 |
| 1 | -4.463327 | -1.372559 | -1.873220 |
| 6 | -0.789333 | -0.653067 | -2.671692 |
| 6 | -0.280166 | -1.514968 | -1.635465 |
| 1 | -0.069378 | 0.016391  | -3.128859 |
| 1 | -1.495427 | -1.088427 | -3.374759 |
| 1 | -0.730906 | -2.502797 | -1.553082 |
| 1 | 0.785935  | -1.509228 | -1.429991 |
| 6 | -2.181029 | 0.813656  | -2.382123 |
| 1 | -2.291227 | 1.659040  | -1.701939 |
| 1 | -1.808482 | 1.210534  | -3.322958 |

|    |           |           |           |
|----|-----------|-----------|-----------|
| 1  | -3.123213 | 0.292023  | -2.537234 |
| 45 | -1.367312 | -0.195513 | -0.426801 |

**INT3**

**HF = -1235.2970539 hartree**

|   |           |           |           |
|---|-----------|-----------|-----------|
| 6 | -0.315304 | 1.066413  | 0.356350  |
| 6 | -1.889700 | 1.000504  | -0.308881 |
| 5 | -0.752683 | 2.094440  | -0.949432 |
| 1 | -0.334210 | 1.867388  | -2.032531 |
| 5 | 0.166106  | 2.717225  | 0.416100  |
| 1 | 1.320610  | 2.957184  | 0.274465  |
| 5 | -0.411971 | 1.879063  | 1.855370  |
| 1 | 0.340069  | 1.544597  | 2.715737  |
| 5 | -1.697112 | 0.768791  | 1.360780  |
| 1 | -1.883326 | -0.303375 | 1.811483  |
| 5 | -2.452548 | 2.564284  | -0.725349 |
| 1 | -3.134606 | 2.645878  | -1.695449 |
| 5 | -1.161989 | 3.680315  | -0.255719 |
| 1 | -0.951914 | 4.675423  | -0.873146 |
| 5 | -0.954405 | 3.545090  | 1.514475  |
| 1 | -0.588269 | 4.456454  | 2.185695  |
| 5 | -2.114181 | 2.323067  | 2.112865  |
| 1 | -2.587655 | 2.351006  | 3.203290  |
| 5 | -3.041591 | 1.740543  | 0.723999  |
| 1 | -4.130674 | 1.276121  | 0.760084  |
| 5 | -2.580531 | 3.450999  | 0.804177  |
| 1 | -3.407126 | 4.293295  | 0.954219  |
| 6 | -2.223508 | -0.188448 | -1.230019 |
| 1 | -2.362813 | 0.211957  | -2.238971 |
| 1 | -1.352815 | -0.846875 | -1.249367 |
| 6 | -3.437415 | -1.014565 | -0.853511 |
| 6 | -4.715446 | -0.679391 | -1.320058 |
| 1 | -4.852263 | 0.197019  | -1.946639 |
| 6 | -5.798936 | -1.477478 | -0.960728 |
| 1 | -6.799847 | -1.235616 | -1.307796 |
| 6 | -5.573528 | -2.589402 | -0.149618 |
| 1 | -6.385798 | -3.241551 | 0.156831  |
| 6 | -4.265645 | -2.849609 | 0.258676  |
| 1 | -4.044246 | -3.711228 | 0.886340  |
| 7 | -3.217207 | -2.091227 | -0.082887 |
| 6 | 3.562741  | 0.594342  | -0.508836 |
| 6 | 2.705476  | 0.710783  | -1.595268 |
| 6 | 2.070473  | -0.604943 | -1.786415 |
| 6 | 2.774607  | -1.566936 | -0.938202 |
| 6 | 3.589402  | -0.816997 | -0.071997 |
| 6 | 4.377134  | 1.679776  | 0.126003  |
| 1 | 5.444740  | 1.551380  | -0.100421 |
| 1 | 4.277142  | 1.668547  | 1.217431  |
| 1 | 4.074912  | 2.668512  | -0.227240 |
| 6 | 2.494948  | 1.927548  | -2.446962 |
| 1 | 2.400248  | 2.838561  | -1.848688 |
| 1 | 1.596842  | 1.844080  | -3.060730 |
| 1 | 3.346851  | 2.062421  | -3.127572 |
| 6 | 1.202801  | -0.968274 | -2.953453 |
| 1 | 1.820086  | -1.124641 | -3.850452 |
| 1 | 0.484049  | -0.176908 | -3.180893 |
| 1 | 0.646001  | -1.890666 | -2.768079 |
| 6 | 2.680446  | -3.058584 | -1.044177 |
| 1 | 3.376508  | -3.426599 | -1.810611 |

|    |           |           |           |
|----|-----------|-----------|-----------|
| 1  | 1.676213  | -3.384880 | -1.329220 |
| 1  | 2.936001  | -3.551608 | -0.102132 |
| 6  | 4.531102  | -1.341982 | 0.970527  |
| 1  | 5.552801  | -1.395967 | 0.568274  |
| 1  | 4.251678  | -2.343167 | 1.306589  |
| 1  | 4.565423  | -0.690785 | 1.849802  |
| 6  | 0.371423  | -1.809410 | 2.587785  |
| 6  | 0.316080  | -1.846738 | 1.052336  |
| 1  | -0.028232 | -0.863565 | 2.969834  |
| 1  | -0.326210 | -2.582876 | 2.949719  |
| 1  | 0.793830  | -2.764257 | 0.690255  |
| 1  | -0.721995 | -1.851474 | 0.717613  |
| 6  | 1.744866  | -2.065587 | 3.218524  |
| 1  | 2.449914  | -1.255733 | 2.998177  |
| 1  | 1.665952  | -2.143146 | 4.309411  |
| 1  | 2.185593  | -3.001850 | 2.851345  |
| 45 | 1.355542  | -0.246882 | 0.205662  |

**IV HF = -1313.8353489 hartree**

|   |           |           |           |
|---|-----------|-----------|-----------|
| 6 | 0.228593  | 1.263280  | -0.034127 |
| 6 | 1.902726  | 0.939786  | 0.497214  |
| 5 | 0.781196  | 1.601222  | 1.578414  |
| 1 | 0.401390  | 0.935808  | 2.475337  |
| 5 | -0.200837 | 2.752738  | 0.700040  |
| 1 | -1.321391 | 2.892669  | 1.049783  |
| 5 | 0.310354  | 2.677901  | -0.987574 |
| 1 | -0.437298 | 2.791204  | -1.899821 |
| 5 | 1.594716  | 1.467878  | -1.085586 |
| 1 | 1.763566  | 0.737135  | -1.997796 |
| 5 | 2.475528  | 2.161610  | 1.534831  |
| 1 | 3.191280  | 1.807854  | 2.416122  |
| 5 | 1.165633  | 3.335819  | 1.669291  |
| 1 | 0.979891  | 3.938762  | 2.678094  |
| 5 | 0.879141  | 4.010732  | 0.045301  |
| 1 | 0.485718  | 5.120020  | -0.129417 |
| 5 | 1.999875  | 3.204168  | -1.085594 |
| 1 | 2.419792  | 3.720631  | -2.071357 |
| 5 | 2.990731  | 2.081264  | -0.152458 |
| 1 | 4.071012  | 1.701277  | -0.456052 |
| 5 | 2.533702  | 3.639642  | 0.563113  |
| 1 | 3.356243  | 4.473325  | 0.772947  |
| 6 | 2.311026  | -0.509716 | 0.808065  |
| 1 | 2.418960  | -0.585094 | 1.893632  |
| 1 | 1.488759  | -1.166496 | 0.517118  |
| 6 | 3.588287  | -1.001038 | 0.156482  |
| 6 | 4.822079  | -0.881230 | 0.809423  |
| 1 | 4.874018  | -0.412334 | 1.787393  |
| 6 | 5.970509  | -1.355701 | 0.180620  |
| 1 | 6.938984  | -1.270306 | 0.665898  |
| 6 | 5.853057  | -1.939168 | -1.080907 |
| 1 | 6.719501  | -2.322890 | -1.610783 |
| 6 | 4.583034  | -2.021902 | -1.650412 |
| 1 | 4.445615  | -2.474137 | -2.631066 |
| 7 | 3.472802  | -1.572008 | -1.052896 |
| 6 | -3.233595 | -1.115346 | 0.575966  |
| 6 | -2.393659 | -0.625448 | 1.640180  |
| 6 | -1.297684 | -1.565421 | 1.794730  |
| 6 | -1.392863 | -2.524905 | 0.767619  |

|    |           |           |           |
|----|-----------|-----------|-----------|
| 6  | -2.570489 | -2.218935 | -0.031441 |
| 6  | -4.641980 | -0.692174 | 0.279289  |
| 1  | -5.338093 | -1.424945 | 0.710100  |
| 1  | -4.850757 | -0.643263 | -0.793870 |
| 1  | -4.883976 | 0.279057  | 0.713303  |
| 6  | -2.762870 | 0.420574  | 2.652648  |
| 1  | -1.879585 | 0.943169  | 3.028956  |
| 1  | -3.272232 | -0.034912 | 3.514127  |
| 1  | -3.433548 | 1.175147  | 2.234097  |
| 6  | -0.386577 | -1.662008 | 2.983536  |
| 1  | -0.849488 | -2.300620 | 3.750084  |
| 1  | -0.196544 | -0.691428 | 3.443781  |
| 1  | 0.577407  | -2.112201 | 2.729897  |
| 6  | -0.552655 | -3.763944 | 0.645358  |
| 1  | -0.909355 | -4.534623 | 1.343399  |
| 1  | 0.500143  | -3.577730 | 0.880300  |
| 1  | -0.601215 | -4.199446 | -0.356866 |
| 6  | -3.124845 | -3.083777 | -1.128671 |
| 1  | -3.647822 | -3.959232 | -0.718639 |
| 1  | -2.339549 | -3.462493 | -1.792275 |
| 1  | -3.843297 | -2.535981 | -1.745652 |
| 6  | -0.676059 | -0.668102 | -2.557459 |
| 6  | 0.141807  | -1.497772 | -1.824320 |
| 1  | -0.295514 | 0.272436  | -2.938233 |
| 1  | -1.591440 | -1.033955 | -3.012762 |
| 1  | -0.134498 | -2.535200 | -1.673535 |
| 1  | 1.181757  | -1.259353 | -1.636551 |
| 6  | -2.517523 | 1.015314  | -1.481928 |
| 1  | -1.933413 | 1.411258  | -2.310010 |
| 1  | -3.235594 | 0.294271  | -1.888415 |
| 45 | -1.220539 | -0.341438 | -0.358079 |
| 6  | -3.244000 | 2.174300  | -0.809161 |
| 1  | -3.659939 | 1.897167  | 0.164504  |
| 1  | -2.545196 | 2.989809  | -0.618822 |
| 6  | -4.379627 | 2.702663  | -1.707068 |
| 1  | -5.148291 | 1.938494  | -1.879276 |
| 1  | -4.866388 | 3.572973  | -1.250015 |
| 1  | -3.995318 | 3.012093  | -2.686549 |

**2TS2**

**HF = -1313.8015209 hartree**

$\nu^* = -332.5478 \text{ cm}^{-1}$

|   |           |          |           |
|---|-----------|----------|-----------|
| 6 | 0.333634  | 1.216453 | 0.007566  |
| 6 | 1.973121  | 0.900911 | 0.561948  |
| 5 | 0.834245  | 1.580978 | 1.621005  |
| 1 | 0.434799  | 0.930207 | 2.520372  |
| 5 | -0.125276 | 2.723084 | 0.695627  |
| 1 | -1.266737 | 2.869298 | 0.984394  |
| 5 | 0.439492  | 2.622534 | -0.970093 |
| 1 | -0.275639 | 2.718690 | -1.910019 |
| 5 | 1.721588  | 1.419674 | -1.027640 |
| 1 | 1.914820  | 0.681285 | -1.928049 |
| 5 | 2.528866  | 2.129033 | 1.610721  |
| 1 | 3.223311  | 1.782275 | 2.511443  |
| 5 | 1.217528  | 3.313269 | 1.699544  |
| 1 | 1.009581  | 3.927276 | 2.697351  |
| 5 | 0.976917  | 3.970702 | 0.060201  |
| 1 | 0.590577  | 5.078975 | -0.136673 |
| 5 | 2.128273  | 3.152866 | -1.030089 |
| 1 | 2.572558  | 3.658772 | -2.010790 |

S47

|    |           |           |           |
|----|-----------|-----------|-----------|
| 5  | 3.089333  | 2.036123  | -0.060468 |
| 1  | 4.176939  | 1.650055  | -0.327630 |
| 5  | 2.616999  | 3.600391  | 0.628755  |
| 1  | 3.435157  | 4.434873  | 0.852400  |
| 6  | 2.353126  | -0.559817 | 0.850255  |
| 1  | 2.493299  | -0.653410 | 1.930938  |
| 1  | 1.499745  | -1.180252 | 0.569221  |
| 6  | 3.584165  | -1.094141 | 0.146196  |
| 6  | 4.855102  | -0.984034 | 0.726107  |
| 1  | 4.972069  | -0.485078 | 1.683504  |
| 6  | 5.955273  | -1.510461 | 0.053898  |
| 1  | 6.950759  | -1.434450 | 0.482895  |
| 6  | 5.753846  | -2.134798 | -1.177098 |
| 1  | 6.579849  | -2.560837 | -1.738462 |
| 6  | 4.452473  | -2.203466 | -1.673062 |
| 1  | 4.250386  | -2.686964 | -2.627384 |
| 7  | 3.387371  | -1.704359 | -1.033726 |
| 6  | -3.335235 | -0.904915 | 0.869228  |
| 6  | -2.394279 | -0.590642 | 1.858305  |
| 6  | -1.269717 | -1.520872 | 1.711103  |
| 6  | -1.588240 | -2.435851 | 0.654458  |
| 6  | -2.806689 | -1.997458 | 0.059479  |
| 6  | -4.699496 | -0.311400 | 0.684977  |
| 1  | -5.471509 | -1.033903 | 0.984120  |
| 1  | -4.901821 | -0.049743 | -0.359869 |
| 1  | -4.840984 | 0.588805  | 1.288212  |
| 6  | -2.544861 | 0.399886  | 2.975634  |
| 1  | -1.632847 | 0.983391  | 3.127450  |
| 1  | -2.766558 | -0.111914 | 3.922973  |
| 1  | -3.358979 | 1.104650  | 2.784829  |
| 6  | -0.259484 | -1.797097 | 2.788007  |
| 1  | -0.735488 | -2.381245 | 3.589529  |
| 1  | 0.131464  | -0.884722 | 3.241192  |
| 1  | 0.584798  | -2.383875 | 2.417593  |
| 6  | -0.831114 | -3.690860 | 0.325322  |
| 1  | -1.107410 | -4.494281 | 1.022488  |
| 1  | 0.251901  | -3.551829 | 0.395354  |
| 1  | -1.054640 | -4.050162 | -0.683179 |
| 6  | -3.570113 | -2.710778 | -1.021433 |
| 1  | -4.225966 | -3.484397 | -0.597636 |
| 1  | -2.902428 | -3.206769 | -1.733634 |
| 1  | -4.210306 | -2.026438 | -1.587588 |
| 6  | -0.820063 | -0.251903 | -2.623570 |
| 6  | -0.094843 | -1.212512 | -1.819614 |
| 1  | -0.266511 | 0.619229  | -2.956697 |
| 1  | -1.463073 | -0.681291 | -3.387513 |
| 1  | -0.392707 | -2.253652 | -1.940979 |
| 1  | 0.976830  | -1.093554 | -1.701239 |
| 6  | -2.512903 | 0.764600  | -2.063611 |
| 1  | -2.402983 | 1.131271  | -3.084631 |
| 1  | -3.255102 | -0.035263 | -2.079191 |
| 45 | -1.183510 | -0.364932 | -0.273934 |
| 6  | -2.975387 | 1.966370  | -1.232871 |
| 1  | -3.185584 | 1.694163  | -0.197487 |
| 1  | -2.196712 | 2.726648  | -1.201510 |
| 6  | -4.234678 | 2.582013  | -1.874519 |
| 1  | -5.064022 | 1.865140  | -1.921137 |
| 1  | -4.572099 | 3.448009  | -1.292949 |



|             |                                   |           |           |
|-------------|-----------------------------------|-----------|-----------|
| 1           | -4.034030                         | 2.924814  | -2.896967 |
| <b>INT4</b> | <b>HF = -1313.8644263 hartree</b> |           |           |
| 6           | -0.493284                         | 1.065102  | 0.386714  |
| 6           | -2.145502                         | 1.032887  | -0.091964 |
| 5           | -1.126942                         | 2.263841  | -0.669757 |
| 1           | -0.847852                         | 2.233671  | -1.818853 |
| 5           | -0.059749                         | 2.707034  | 0.657135  |
| 1           | 1.059965                          | 3.022952  | 0.417927  |
| 5           | -0.434912                         | 1.622562  | 1.997203  |
| 1           | 0.420511                          | 1.192629  | 2.701189  |
| 5           | -1.739290                         | 0.546307  | 1.477289  |
| 1           | -1.845830                         | -0.592198 | 1.759910  |
| 5           | -2.797773                         | 2.615948  | -0.175524 |
| 1           | -3.593315                         | 2.818895  | -1.035277 |
| 5           | -1.487880                         | 3.700802  | 0.314505  |
| 1           | -1.381985                         | 4.789887  | -0.152607 |
| 5           | -1.059248                         | 3.293778  | 2.001512  |
| 1           | -0.638641                         | 4.101361  | 2.767137  |
| 5           | -2.103074                         | 1.938393  | 2.521558  |
| 1           | -2.437804                         | 1.768049  | 3.649922  |
| 5           | -3.179671                         | 1.544006  | 1.176183  |
| 1           | -4.242717                         | 1.028623  | 1.264797  |
| 5           | -2.757401                         | 3.239926  | 1.482880  |
| 1           | -3.582277                         | 4.007325  | 1.865148  |
| 6           | -2.552393                         | -0.006215 | -1.152809 |
| 1           | -2.850633                         | 0.546680  | -2.049102 |
| 1           | -1.663370                         | -0.589140 | -1.400834 |
| 6           | -3.658951                         | -0.972247 | -0.778348 |
| 6           | -5.006936                         | -0.642774 | -0.973442 |
| 1           | -5.275611                         | 0.330167  | -1.374034 |
| 6           | -5.987531                         | -1.574324 | -0.641181 |
| 1           | -7.039262                         | -1.340375 | -0.782251 |
| 6           | -5.593392                         | -2.809585 | -0.127226 |
| 1           | -6.320642                         | -3.568506 | 0.145032  |
| 6           | -4.228490                         | -3.051288 | 0.025403  |
| 1           | -3.876763                         | -4.004357 | 0.416975  |
| 7           | -3.277905                         | -2.164655 | -0.293508 |
| 6           | 3.302590                          | 0.800160  | -1.074920 |
| 6           | 2.287787                          | 1.169656  | -1.951183 |
| 6           | 1.557637                          | -0.057278 | -2.304563 |
| 6           | 2.329165                          | -1.194479 | -1.803704 |
| 6           | 3.323026                          | -0.672149 | -0.958600 |
| 6           | 4.272042                          | 1.699602  | -0.369594 |
| 1           | 5.279491                          | 1.599276  | -0.796519 |
| 1           | 4.347833                          | 1.448086  | 0.694110  |
| 1           | 3.979128                          | 2.749402  | -0.443285 |
| 6           | 2.014376                          | 2.538531  | -2.497150 |
| 1           | 0.947170                          | 2.726355  | -2.626336 |
| 1           | 2.489154                          | 2.654499  | -3.481978 |
| 1           | 2.408962                          | 3.322591  | -1.845794 |
| 6           | 0.519180                          | -0.143236 | -3.382248 |
| 1           | 1.002614                          | -0.108086 | -4.369890 |
| 1           | -0.185623                         | 0.690228  | -3.331194 |
| 1           | -0.047093                         | -1.076576 | -3.324068 |
| 6           | 2.131517                          | -2.623686 | -2.208183 |
| 1           | 2.605961                          | -2.806258 | -3.182382 |
| 1           | 1.072675                          | -2.880807 | -2.304452 |

|    |           |           |           |
|----|-----------|-----------|-----------|
| 1  | 2.579109  | -3.316100 | -1.489903 |
| 6  | 4.402837  | -1.443042 | -0.257710 |
| 1  | 5.291609  | -1.528805 | -0.899286 |
| 1  | 4.080747  | -2.456650 | -0.004116 |
| 1  | 4.717897  | -0.951855 | 0.666497  |
| 6  | 0.471565  | -2.124429 | 2.044080  |
| 6  | 0.326328  | -1.895596 | 0.528069  |
| 1  | -0.037060 | -1.337138 | 2.610630  |
| 1  | -0.102880 | -3.042404 | 2.252740  |
| 1  | 0.834304  | -2.707999 | -0.003627 |
| 1  | -0.731813 | -1.927828 | 0.261074  |
| 6  | 1.888345  | -2.311764 | 2.616065  |
| 1  | 1.813957  | -2.893922 | 3.545930  |
| 1  | 2.493013  | -2.922159 | 1.927997  |
| 45 | 1.186950  | -0.131571 | -0.179999 |
| 6  | 2.622504  | -1.005044 | 2.938256  |
| 1  | 2.716715  | -0.398573 | 2.021438  |
| 1  | 2.004864  | -0.408462 | 3.622022  |
| 6  | 4.005596  | -1.217529 | 3.563110  |
| 1  | 4.659296  | -1.808711 | 2.909655  |
| 1  | 4.506399  | -0.263760 | 3.767407  |
| 1  | 3.924005  | -1.757359 | 4.514611  |

**2V-1**

**HF = -1156.7213032 hartree**

|   |           |           |           |
|---|-----------|-----------|-----------|
| 6 | 1.746047  | 0.696818  | 0.347898  |
| 5 | 0.742811  | 1.757276  | 1.211667  |
| 1 | 0.371503  | 1.398396  | 2.281766  |
| 5 | -0.070574 | 2.751555  | -0.003494 |
| 1 | -1.156093 | 3.200287  | 0.182511  |
| 5 | 0.458424  | 2.171790  | -1.601974 |
| 1 | -0.219686 | 2.203914  | -2.580147 |
| 5 | 1.592717  | 0.846047  | -1.342356 |
| 1 | 1.873350  | -0.077334 | -2.019008 |
| 5 | 2.482957  | 2.082302  | 1.096250  |
| 1 | 3.252899  | 1.864460  | 1.969921  |
| 5 | 1.349309  | 3.404931  | 0.861466  |
| 1 | 1.276557  | 4.272802  | 1.670716  |
| 5 | 1.172292  | 3.661146  | -0.898937 |
| 1 | 0.971594  | 4.735248  | -1.367414 |
| 5 | 2.206357  | 2.478547  | -1.725940 |
| 1 | 2.833191  | 2.610686  | -2.724041 |
| 1 | 3.848223  | 1.090295  | -0.587621 |
| 5 | 2.755063  | 3.243219  | -0.213391 |
| 1 | 3.755352  | 3.880646  | -0.191029 |
| 6 | 2.132818  | -0.656827 | 0.978570  |
| 1 | 2.158907  | -0.516735 | 2.063002  |
| 1 | 1.319678  | -1.347941 | 0.750251  |
| 6 | 3.440210  | -1.271107 | 0.518669  |
| 6 | 4.635598  | -1.046320 | 1.216232  |
| 1 | 4.638912  | -0.422008 | 2.104932  |
| 6 | 5.811731  | -1.636775 | 0.754218  |
| 1 | 6.749924  | -1.477646 | 1.278859  |
| 6 | 5.758297  | -2.436114 | -0.386490 |
| 1 | 6.646600  | -2.918582 | -0.782658 |
| 6 | 4.521525  | -2.607978 | -1.010830 |
| 1 | 4.433208  | -3.228794 | -1.900728 |
| 7 | 3.388194  | -2.046273 | -0.577249 |
| 6 | -3.759295 | 0.405161  | 0.093406  |

|    |           |           |           |
|----|-----------|-----------|-----------|
| 6  | -2.949895 | 0.427481  | 1.233349  |
| 6  | -2.361586 | -0.908353 | 1.356346  |
| 6  | -3.063474 | -1.793084 | 0.409358  |
| 6  | -3.850263 | -0.979960 | -0.405488 |
| 6  | -4.518004 | 1.553132  | -0.503799 |
| 1  | -5.587790 | 1.486393  | -0.260233 |
| 1  | -4.437599 | 1.560352  | -1.596621 |
| 1  | -4.149907 | 2.514714  | -0.137586 |
| 6  | -2.767474 | 1.557072  | 2.201140  |
| 1  | -3.014564 | 2.521569  | 1.750571  |
| 1  | -1.741413 | 1.620992  | 2.568924  |
| 1  | -3.423021 | 1.419301  | 3.073205  |
| 6  | -1.581757 | -1.389710 | 2.544314  |
| 1  | -2.261990 | -1.654259 | 3.368004  |
| 1  | -0.900753 | -0.617999 | 2.912557  |
| 1  | -0.992244 | -2.279665 | 2.305303  |
| 6  | -2.912161 | -3.283602 | 0.359256  |
| 1  | -3.513949 | -3.762772 | 1.144022  |
| 1  | -1.871864 | -3.588019 | 0.512191  |
| 1  | -3.237441 | -3.694098 | -0.601177 |
| 6  | -4.707134 | -1.394715 | -1.565426 |
| 1  | -5.773116 | -1.369700 | -1.299010 |
| 1  | -4.474235 | -2.409604 | -1.899344 |
| 1  | -4.576504 | -0.724196 | -2.422591 |
| 6  | -0.372367 | -1.697091 | -1.497918 |
| 1  | -0.907582 | -2.654724 | -1.502220 |
| 1  | 0.667371  | -1.871395 | -1.216793 |
| 1  | -0.371451 | -1.287102 | -2.524314 |
| 5  | 0.130183  | 0.978123  | -0.290400 |
| 6  | 2.886154  | 1.573932  | -0.475676 |
| 45 | -1.522999 | -0.304445 | -0.505571 |

### III-1

HF = -1235.2811625 hartree

|   |           |           |           |
|---|-----------|-----------|-----------|
| 6 | 1.750037  | 0.750523  | 0.440763  |
| 5 | 0.792531  | 1.854512  | 1.295457  |
| 1 | 0.274878  | 1.492716  | 2.295880  |
| 5 | 0.221137  | 3.033497  | 0.115569  |
| 1 | -0.809137 | 3.607525  | 0.261811  |
| 5 | 0.845750  | 2.530983  | -1.474304 |
| 1 | 0.315773  | 2.743978  | -2.514839 |
| 5 | 1.763196  | 1.056884  | -1.234411 |
| 1 | 2.016017  | 0.172668  | -1.973659 |
| 5 | 2.565129  | 1.970032  | 1.373032  |
| 1 | 3.209415  | 1.586014  | 2.290660  |
| 5 | 1.616319  | 3.432568  | 1.160046  |
| 1 | 1.559300  | 4.233200  | 2.036883  |
| 5 | 1.648677  | 3.853361  | -0.573755 |
| 1 | 1.620938  | 4.977439  | -0.959292 |
| 5 | 2.613307  | 2.621140  | -1.409325 |
| 1 | 3.345678  | 2.749892  | -2.333466 |
| 1 | 3.956883  | 0.949590  | -0.271444 |
| 5 | 3.094958  | 3.189333  | 0.206268  |
| 1 | 4.157138  | 3.690586  | 0.372988  |
| 6 | 1.928512  | -0.689187 | 0.960934  |
| 1 | 1.950102  | -0.646082 | 2.052933  |
| 1 | 1.028176  | -1.233898 | 0.667098  |
| 6 | 3.141915  | -1.450086 | 0.464745  |
| 6 | 4.344014  | -1.451950 | 1.186403  |

|    |           |           |           |
|----|-----------|-----------|-----------|
| 1  | 4.420037  | -0.898992 | 2.118252  |
| 6  | 5.430977  | -2.173339 | 0.693095  |
| 1  | 6.372192  | -2.190037 | 1.235722  |
| 6  | 5.283788  | -2.874415 | -0.502690 |
| 1  | 6.099879  | -3.452532 | -0.925050 |
| 6  | 4.047510  | -2.820384 | -1.148293 |
| 1  | 3.887618  | -3.358234 | -2.081052 |
| 7  | 2.998805  | -2.131409 | -0.684875 |
| 6  | -3.707872 | -0.213279 | 0.369274  |
| 6  | -2.767564 | 0.245072  | 1.378391  |
| 6  | -1.908500 | -0.864526 | 1.703953  |
| 6  | -2.218844 | -1.925884 | 0.811146  |
| 6  | -3.343495 | -1.524058 | -0.009857 |
| 6  | -4.915518 | 0.550423  | -0.085950 |
| 1  | -5.725196 | 0.454877  | 0.650829  |
| 1  | -5.299078 | 0.180991  | -1.041893 |
| 1  | -4.707885 | 1.618071  | -0.201900 |
| 6  | -2.918000 | 1.509154  | 2.175935  |
| 1  | -1.974650 | 1.803853  | 2.642083  |
| 1  | -3.663486 | 1.388554  | 2.975487  |
| 1  | -3.245778 | 2.343912  | 1.547971  |
| 6  | -1.050648 | -0.988636 | 2.930604  |
| 1  | -1.658516 | -1.337292 | 3.778362  |
| 1  | -0.604512 | -0.037314 | 3.226091  |
| 1  | -0.243177 | -1.715130 | 2.798466  |
| 6  | -1.645119 | -3.314082 | 0.861380  |
| 1  | -2.218542 | -3.948194 | 1.552828  |
| 1  | -0.605358 | -3.317440 | 1.203170  |
| 1  | -1.674827 | -3.806566 | -0.116102 |
| 6  | -4.036080 | -2.404107 | -1.012421 |
| 1  | -4.691977 | -3.137666 | -0.522891 |
| 1  | -3.320612 | -2.972954 | -1.618564 |
| 1  | -4.656521 | -1.821338 | -1.699971 |
| 6  | -1.060165 | -0.522415 | -2.628680 |
| 6  | -0.382779 | -1.443144 | -1.832489 |
| 1  | -0.523050 | 0.293705  | -3.099598 |
| 1  | -2.015073 | -0.775262 | -3.083402 |
| 1  | -0.832334 | -2.410956 | -1.629290 |
| 1  | 0.689025  | -1.402037 | -1.683644 |
| 6  | -2.301241 | 1.672334  | -1.541896 |
| 1  | -2.585141 | 2.406246  | -0.783911 |
| 1  | -1.625513 | 2.136385  | -2.254407 |
| 1  | -3.188906 | 1.307382  | -2.068063 |
| 6  | 3.053212  | 1.540727  | -0.193810 |
| 5  | 0.208410  | 1.275540  | -0.321217 |
| 45 | -1.493718 | -0.011056 | -0.530244 |

**2TS1-1**

**HF = -1235.2435204 hartree**

$\nu^{\ddagger} = -450.1092 \text{ icm}^{-1}$

|   |           |          |           |
|---|-----------|----------|-----------|
| 6 | 1.797218  | 0.738962 | 0.443666  |
| 5 | 0.809940  | 1.799818 | 1.308483  |
| 1 | 0.386764  | 1.423676 | 2.348141  |
| 5 | 0.091422  | 2.889618 | 0.115976  |
| 1 | -0.977279 | 3.387625 | 0.279642  |
| 5 | 0.673458  | 2.372468 | -1.481325 |
| 1 | 0.059923  | 2.502889 | -2.490112 |
| 5 | 1.714498  | 0.978857 | -1.236848 |
| 1 | 1.992437  | 0.081532 | -1.951824 |
| 5 | 2.567332  | 2.049416 | 1.288541  |

S52

|   |           |           |           |
|---|-----------|-----------|-----------|
| 1 | 3.283834  | 1.750603  | 2.183825  |
| 5 | 1.502135  | 3.430561  | 1.074328  |
| 1 | 1.430702  | 4.259099  | 1.923811  |
| 5 | 1.420251  | 3.783343  | -0.674349 |
| 1 | 1.290790  | 4.887072  | -1.096974 |
| 5 | 2.433239  | 2.593789  | -1.514664 |
| 1 | 3.107958  | 2.739368  | -2.479472 |
| 1 | 3.951519  | 1.068475  | -0.385228 |
| 5 | 2.948606  | 3.256714  | 0.054182  |
| 1 | 3.976494  | 3.841289  | 0.150057  |
| 6 | 2.090646  | -0.662462 | 1.013003  |
| 1 | 2.127732  | -0.574517 | 2.102270  |
| 1 | 1.226174  | -1.279357 | 0.758669  |
| 6 | 3.347818  | -1.351309 | 0.521848  |
| 6 | 4.558918  | -1.237212 | 1.219145  |
| 1 | 4.610259  | -0.644503 | 2.127986  |
| 6 | 5.687043  | -1.898087 | 0.733780  |
| 1 | 6.635560  | -1.825424 | 1.258896  |
| 6 | 5.571659  | -2.656119 | -0.430276 |
| 1 | 6.420335  | -3.191604 | -0.844672 |
| 6 | 4.324236  | -2.716410 | -1.053712 |
| 1 | 4.188349  | -3.301905 | -1.961359 |
| 7 | 3.236184  | -2.086239 | -0.597812 |
| 6 | -3.683432 | 0.183130  | 0.497742  |
| 6 | -2.711582 | 0.373017  | 1.505410  |
| 6 | -1.985583 | -0.880952 | 1.657589  |
| 6 | -2.621056 | -1.855674 | 0.796074  |
| 6 | -3.627503 | -1.197879 | 0.053653  |
| 6 | -4.675428 | 1.195695  | 0.006789  |
| 1 | -5.701630 | 0.904551  | 0.268904  |
| 1 | -4.645899 | 1.305250  | -1.085820 |
| 1 | -4.490911 | 2.182118  | 0.440766  |
| 6 | -2.602380 | 1.574400  | 2.400858  |
| 1 | -1.619778 | 1.649267  | 2.868545  |
| 1 | -3.345939 | 1.515811  | 3.208886  |
| 1 | -2.775888 | 2.508997  | 1.859378  |
| 6 | -1.090050 | -1.229496 | 2.814111  |
| 1 | -1.685072 | -1.512037 | 3.695400  |
| 1 | -0.455898 | -0.389466 | 3.106321  |
| 1 | -0.437576 | -2.076773 | 2.580316  |
| 6 | -2.295117 | -3.321525 | 0.761893  |
| 1 | -2.857728 | -3.865791 | 1.533487  |
| 1 | -1.231686 | -3.504429 | 0.944833  |
| 1 | -2.548178 | -3.775894 | -0.201618 |
| 6 | -4.569217 | -1.812410 | -0.942938 |
| 1 | -5.544776 | -2.035737 | -0.487823 |
| 1 | -4.179467 | -2.751880 | -1.348139 |
| 1 | -4.763338 | -1.140889 | -1.787823 |
| 6 | -0.845216 | -0.723175 | -2.646818 |
| 6 | -0.356894 | -1.558030 | -1.568873 |
| 1 | -0.095562 | -0.115963 | -3.144319 |
| 1 | -1.549414 | -1.180952 | -3.339032 |
| 1 | -0.830181 | -2.534245 | -1.456532 |
| 1 | 0.715434  | -1.589469 | -1.399065 |
| 6 | -2.160897 | 0.792015  | -2.455554 |
| 1 | -2.237821 | 1.666207  | -1.807787 |
| 1 | -1.767312 | 1.142682  | -3.407406 |
| 1 | -3.130933 | 0.318845  | -2.603778 |

|    |           |           |           |
|----|-----------|-----------|-----------|
| 6  | 3.010843  | 1.595369  | -0.284862 |
| 5  | 0.193998  | 1.123508  | -0.257552 |
| 45 | -1.465419 | -0.194275 | -0.440349 |

**INT3-1**

**HF = -1235.2882145 hartree**

|   |           |           |           |
|---|-----------|-----------|-----------|
| 6 | -1.862428 | 0.796702  | -0.296523 |
| 5 | -0.917495 | 2.022991  | -0.977213 |
| 1 | -0.592414 | 1.880299  | -2.109231 |
| 5 | -0.067757 | 2.789678  | 0.369107  |
| 1 | 1.002210  | 3.290039  | 0.230325  |
| 5 | -0.520552 | 1.905408  | 1.848089  |
| 1 | 0.196756  | 1.766828  | 2.788771  |
| 5 | -1.648169 | 0.628769  | 1.381541  |
| 1 | -1.895649 | -0.412152 | 1.874931  |
| 5 | -2.654849 | 2.281343  | -0.738067 |
| 1 | -3.456006 | 2.217308  | -1.608453 |
| 5 | -1.532640 | 3.560797  | -0.301775 |
| 1 | -1.505545 | 4.566629  | -0.934961 |
| 5 | -1.283203 | 3.486409  | 1.467657  |
| 1 | -1.079513 | 4.456935  | 2.123274  |
| 5 | -2.265888 | 2.145932  | 2.095353  |
| 1 | -2.852615 | 2.071513  | 3.123347  |
| 1 | -3.932674 | 0.959409  | 0.778403  |
| 5 | -2.888408 | 3.168761  | 0.776826  |
| 1 | -3.898177 | 3.776490  | 0.912992  |
| 6 | -2.248724 | -0.423938 | -1.156545 |
| 1 | -2.276113 | -0.092569 | -2.198551 |
| 1 | -1.435600 | -1.145395 | -1.058310 |
| 6 | -3.555566 | -1.112303 | -0.816420 |
| 6 | -4.742223 | -0.790390 | -1.490087 |
| 1 | -4.738872 | -0.031802 | -2.267206 |
| 6 | -5.917649 | -1.459988 | -1.151047 |
| 1 | -6.848853 | -1.229284 | -1.661330 |
| 6 | -5.871880 | -2.431820 | -0.152904 |
| 1 | -6.759578 | -2.982453 | 0.143039  |
| 6 | -4.643546 | -2.687487 | 0.459582  |
| 1 | -4.562300 | -3.442395 | 1.239764  |
| 7 | -3.510345 | -2.051986 | 0.142829  |
| 6 | 3.664066  | 0.690668  | -0.441532 |
| 6 | 2.740334  | 0.850935  | -1.476178 |
| 6 | 2.188812  | -0.479331 | -1.759992 |
| 6 | 3.017420  | -1.461467 | -1.040394 |
| 6 | 3.856362  | -0.746930 | -0.186221 |
| 6 | 4.437146  | 1.769495  | 0.257678  |
| 1 | 5.478841  | 1.799542  | -0.092249 |
| 1 | 4.468095  | 1.601970  | 1.340347  |
| 1 | 3.998373  | 2.755716  | 0.086481  |
| 6 | 2.448533  | 2.109511  | -2.236331 |
| 1 | 1.426109  | 2.134873  | -2.616094 |
| 1 | 3.122178  | 2.191975  | -3.101825 |
| 1 | 2.591835  | 3.001642  | -1.621056 |
| 6 | 1.328608  | -0.811119 | -2.944311 |
| 1 | 1.944430  | -0.915611 | -3.850491 |
| 1 | 0.590877  | -0.027073 | -3.134816 |
| 1 | 0.793832  | -1.754470 | -2.799293 |
| 6 | 2.948322  | -2.945684 | -1.237302 |
| 1 | 3.513577  | -3.244853 | -2.131168 |
| 1 | 1.917716  | -3.287681 | -1.375861 |

|    |           |           |           |
|----|-----------|-----------|-----------|
| 1  | 3.366141  | -3.491415 | -0.386059 |
| 6  | 4.866311  | -1.295420 | 0.778186  |
| 1  | 5.887054  | -1.178432 | 0.387559  |
| 1  | 4.706057  | -2.359348 | 0.972224  |
| 1  | 4.831902  | -0.774369 | 1.741431  |
| 6  | 0.562091  | -1.869451 | 2.552316  |
| 6  | 0.452208  | -1.863205 | 1.015475  |
| 1  | 0.086904  | -0.975372 | 2.975240  |
| 1  | -0.028691 | -2.720236 | 2.930898  |
| 1  | 0.951958  | -2.755654 | 0.613583  |
| 1  | -0.601042 | -1.928118 | 0.734033  |
| 6  | 1.986466  | -1.987247 | 3.111371  |
| 1  | 2.591608  | -1.105091 | 2.866488  |
| 1  | 1.975554  | -2.086867 | 4.203695  |
| 1  | 2.502459  | -2.864823 | 2.700904  |
| 6  | -2.984255 | 1.478726  | 0.722859  |
| 5  | -0.224037 | 0.988877  | 0.325750  |
| 45 | 1.490758  | -0.226182 | 0.241623  |

**IV-1**

**HF = -1313.8385299 hartree**

|   |           |           |           |
|---|-----------|-----------|-----------|
| 6 | 1.885523  | 0.740940  | 0.518857  |
| 5 | 0.899937  | 1.515402  | 1.645509  |
| 1 | 0.565225  | 0.908513  | 2.603529  |
| 5 | 0.044075  | 2.781999  | 0.781097  |
| 1 | -1.011712 | 3.166156  | 1.160276  |
| 5 | 0.524337  | 2.671491  | -0.930684 |
| 1 | -0.157684 | 2.984305  | -1.849521 |
| 5 | 1.654184  | 1.330523  | -1.063791 |
| 1 | 1.930251  | 0.643053  | -1.982640 |
| 5 | 2.639924  | 1.891988  | 1.579175  |
| 1 | 3.436067  | 1.455882  | 2.340697  |
| 5 | 1.489537  | 3.202219  | 1.740637  |
| 1 | 1.429022  | 3.818977  | 2.755092  |
| 5 | 1.253278  | 3.919869  | 0.123719  |
| 1 | 1.027763  | 5.076204  | -0.035521 |
| 5 | 2.261345  | 3.014633  | -1.019534 |
| 1 | 2.852251  | 3.411475  | -1.968413 |
| 1 | 3.941508  | 1.394179  | -0.356199 |
| 5 | 2.858850  | 3.359907  | 0.620896  |
| 1 | 3.857358  | 3.980870  | 0.778761  |
| 6 | 2.333806  | -0.710482 | 0.786135  |
| 1 | 2.411589  | -0.830466 | 1.869771  |
| 1 | 1.525211  | -1.358806 | 0.444110  |
| 6 | 3.633623  | -1.152423 | 0.143813  |
| 6 | 4.838674  | -1.135906 | 0.859829  |
| 1 | 4.853536  | -0.798929 | 1.892006  |
| 6 | 6.008772  | -1.557776 | 0.228865  |
| 1 | 6.954128  | -1.554703 | 0.764500  |
| 6 | 5.940405  | -1.985810 | -1.095981 |
| 1 | 6.823524  | -2.325347 | -1.628352 |
| 6 | 4.695842  | -1.971730 | -1.727751 |
| 1 | 4.596294  | -2.301808 | -2.760234 |
| 7 | 3.568022  | -1.569213 | -1.132231 |
| 6 | -3.452920 | -0.948567 | 0.531743  |
| 6 | -2.562640 | -0.460800 | 1.568789  |
| 6 | -1.534839 | -1.457430 | 1.752602  |
| 6 | -1.725989 | -2.465993 | 0.771666  |
| 6 | -2.909460 | -2.145568 | 0.009248  |

|    |           |           |           |
|----|-----------|-----------|-----------|
| 6  | -4.801446 | -0.396285 | 0.166089  |
| 1  | -5.578945 | -1.143519 | 0.371916  |
| 1  | -4.879298 | -0.135189 | -0.896176 |
| 1  | -5.048018 | 0.495715  | 0.745582  |
| 6  | -2.869843 | 0.635056  | 2.551922  |
| 1  | -3.458886 | 0.248155  | 3.396491  |
| 1  | -3.442884 | 1.446575  | 2.097233  |
| 1  | -1.957157 | 1.076049  | 2.961890  |
| 6  | -0.629404 | -1.587699 | 2.944611  |
| 1  | -1.090577 | -2.246791 | 3.695064  |
| 1  | -0.444291 | -0.628299 | 3.429038  |
| 1  | 0.339812  | -2.027438 | 2.687732  |
| 6  | -0.965809 | -3.759113 | 0.692556  |
| 1  | -1.397640 | -4.502835 | 1.377708  |
| 1  | 0.086137  | -3.637164 | 0.970531  |
| 1  | -1.000075 | -4.198774 | -0.309708 |
| 6  | -3.526764 | -3.000089 | -1.062055 |
| 1  | -4.164555 | -3.787976 | -0.635942 |
| 1  | -2.768606 | -3.502651 | -1.673956 |
| 1  | -4.153291 | -2.405994 | -1.735328 |
| 6  | -0.796325 | -0.774340 | -2.509788 |
| 6  | 0.067438  | -1.529451 | -1.730318 |
| 1  | -0.434068 | 0.124040  | -2.996761 |
| 1  | -1.700388 | -1.204766 | -2.933103 |
| 1  | -0.164777 | -2.565608 | -1.507042 |
| 1  | 1.112877  | -1.265984 | -1.639717 |
| 6  | -2.377122 | 1.186877  | -1.510493 |
| 1  | -1.725284 | 1.585855  | -2.287098 |
| 1  | -3.126752 | 0.551825  | -2.002328 |
| 6  | 2.984974  | 1.818869  | -0.079378 |
| 5  | 0.192427  | 1.150121  | -0.002687 |
| 45 | -1.302361 | -0.335720 | -0.385116 |
| 6  | -3.066557 | 2.355860  | -0.814610 |
| 1  | -3.664540 | 2.023333  | 0.038776  |
| 1  | -2.324085 | 3.048956  | -0.416747 |
| 6  | -3.980672 | 3.122218  | -1.789367 |
| 1  | -4.779642 | 2.479291  | -2.180885 |
| 1  | -4.452591 | 3.981206  | -1.295619 |
| 1  | -3.411777 | 3.501417  | -2.647173 |

**2TS2-1**

HF = -1313.7988204 hartree

$v^{\ddagger} = -341.8466 \text{ icm}^{-1}$

|   |           |          |           |
|---|-----------|----------|-----------|
| 6 | 1.942025  | 0.683270 | 0.560087  |
| 5 | 0.944505  | 1.441288 | 1.693956  |
| 1 | 0.610664  | 0.823738 | 2.646192  |
| 5 | 0.080298  | 2.710604 | 0.824668  |
| 1 | -0.999704 | 3.073475 | 1.165209  |
| 5 | 0.592501  | 2.613667 | -0.878608 |
| 1 | -0.068489 | 2.916996 | -1.816726 |
| 5 | 1.734654  | 1.291813 | -1.007988 |
| 1 | 2.030155  | 0.613014 | -1.926726 |
| 5 | 2.678147  | 1.823730 | 1.647727  |
| 1 | 3.468333  | 1.387947 | 2.415827  |
| 5 | 1.514171  | 3.130555 | 1.809820  |
| 1 | 1.440331  | 3.735700 | 2.830472  |
| 5 | 1.292268  | 3.862917 | 0.196537  |
| 1 | 1.061729  | 5.019737 | 0.046742  |
| 5 | 2.325179  | 2.978359 | -0.940950 |
| 1 | 2.922359  | 3.390573 | -1.879388 |



|    |           |           |           |
|----|-----------|-----------|-----------|
| 1  | 4.009959  | 1.364443  | -0.272871 |
| 5  | 2.896751  | 3.308955  | 0.711234  |
| 1  | 3.887683  | 3.936674  | 0.889026  |
| 6  | 2.373452  | -0.783354 | 0.752793  |
| 1  | 2.429626  | -0.973442 | 1.827650  |
| 1  | 1.564176  | -1.393949 | 0.347293  |
| 6  | 3.673628  | -1.205914 | 0.099007  |
| 6  | 4.888740  | -1.155786 | 0.797093  |
| 1  | 4.911393  | -0.803757 | 1.824257  |
| 6  | 6.057345  | -1.565734 | 0.156032  |
| 1  | 7.010135  | -1.537306 | 0.677671  |
| 6  | 5.977129  | -2.017044 | -1.160546 |
| 1  | 6.858438  | -2.349752 | -1.700302 |
| 6  | 4.723016  | -2.037326 | -1.773018 |
| 1  | 4.614907  | -2.388226 | -2.797837 |
| 7  | 3.595700  | -1.646191 | -1.168509 |
| 6  | -3.471625 | -0.763604 | 0.890327  |
| 6  | -2.436204 | -0.529516 | 1.816149  |
| 6  | -1.417226 | -1.550733 | 1.597256  |
| 6  | -1.914651 | -2.449793 | 0.577925  |
| 6  | -3.142394 | -1.940052 | 0.106207  |
| 6  | -4.768943 | -0.019907 | 0.767703  |
| 1  | -5.603281 | -0.634915 | 1.133048  |
| 1  | -5.000709 | 0.236068  | -0.273610 |
| 1  | -4.768663 | 0.907888  | 1.345801  |
| 6  | -2.449210 | 0.455438  | 2.950088  |
| 1  | -2.771674 | -0.027165 | 3.884635  |
| 1  | -3.135517 | 1.286026  | 2.759587  |
| 1  | -1.460853 | 0.884815  | 3.129359  |
| 6  | -0.379065 | -1.942589 | 2.612638  |
| 1  | -0.845187 | -2.529140 | 3.418716  |
| 1  | 0.094675  | -1.075929 | 3.077011  |
| 1  | 0.406397  | -2.566559 | 2.176124  |
| 6  | -1.262394 | -3.741690 | 0.175227  |
| 1  | -1.546157 | -4.552939 | 0.860675  |
| 1  | -0.170364 | -3.668409 | 0.190673  |
| 1  | -1.557530 | -4.054236 | -0.831532 |
| 6  | -4.038355 | -2.556424 | -0.931388 |
| 1  | -4.836681 | -3.156304 | -0.470975 |
| 1  | -3.485186 | -3.219216 | -1.604879 |
| 1  | -4.533348 | -1.797156 | -1.548402 |
| 6  | -0.921719 | -0.147663 | -2.639871 |
| 6  | -0.211772 | -1.155445 | -1.867390 |
| 1  | -0.335675 | 0.702369  | -2.977663 |
| 1  | -1.579946 | -0.544469 | -3.409913 |
| 1  | -0.546901 | -2.183650 | -2.013804 |
| 1  | 0.869321  | -1.081883 | -1.804456 |
| 6  | -2.537419 | 0.924077  | -2.039167 |
| 1  | -2.471739 | 1.274484  | -3.070566 |
| 1  | -3.337206 | 0.180329  | -2.004799 |
| 6  | 3.046192  | 1.778806  | -0.005580 |
| 5  | 0.259207  | 1.084145  | 0.050757  |
| 45 | -1.297359 | -0.333590 | -0.314838 |
| 6  | -2.864110 | 2.162162  | -1.195417 |
| 1  | -3.067767 | 1.901149  | -0.155268 |
| 1  | -2.014471 | 2.844220  | -1.181445 |
| 6  | -4.077446 | 2.903317  | -1.790689 |
| 1  | -4.974142 | 2.271133  | -1.809235 |

|   |           |          |           |
|---|-----------|----------|-----------|
| 1 | -4.310092 | 3.795774 | -1.197260 |
| 1 | -3.880128 | 3.229575 | -2.819601 |

**INT4-1**

**HF = -1313.8590535 hartree**

|   |           |           |           |
|---|-----------|-----------|-----------|
| 6 | -2.039627 | 0.825085  | -0.319436 |
| 5 | -1.154591 | 2.042471  | -1.088303 |
| 1 | -0.896416 | 1.879082  | -2.233565 |
| 5 | -0.236311 | 2.856763  | 0.181150  |
| 1 | 0.814606  | 3.370532  | -0.036870 |
| 5 | -0.593118 | 2.016091  | 1.709040  |
| 1 | 0.172551  | 1.927068  | 2.613803  |
| 5 | -1.720793 | 0.709562  | 1.343536  |
| 1 | -1.931590 | -0.319509 | 1.877722  |
| 5 | -2.878645 | 2.286802  | -0.757510 |
| 1 | -3.726580 | 2.185770  | -1.579064 |
| 5 | -1.749953 | 3.591066  | -0.424708 |
| 1 | -1.772640 | 4.577701  | -1.087592 |
| 5 | -1.399726 | 3.571747  | 1.327281  |
| 1 | -1.171840 | 4.563494  | 1.942074  |
| 5 | -2.323822 | 2.238425  | 2.049023  |
| 1 | -2.847324 | 2.186443  | 3.112109  |
| 1 | -4.045095 | 0.991529  | 0.867521  |
| 5 | -3.036497 | 3.214566  | 0.741321  |
| 1 | -4.045633 | 3.812566  | 0.919305  |
| 6 | -2.459174 | -0.428948 | -1.112013 |
| 1 | -2.602523 | -0.126486 | -2.153319 |
| 1 | -1.609471 | -1.112941 | -1.076396 |
| 6 | -3.693439 | -1.165182 | -0.629455 |
| 6 | -4.966006 | -0.859952 | -1.133370 |
| 1 | -5.083156 | -0.080364 | -1.880475 |
| 6 | -6.069781 | -1.572708 | -0.665956 |
| 1 | -7.065299 | -1.354687 | -1.042990 |
| 6 | -5.869540 | -2.571375 | 0.285813  |
| 1 | -6.696802 | -3.155576 | 0.677156  |
| 6 | -4.565592 | -2.809564 | 0.723506  |
| 1 | -4.363433 | -3.584787 | 1.460622  |
| 7 | -3.500089 | -2.131517 | 0.283621  |
| 6 | 3.439609  | 0.531386  | -1.124706 |
| 6 | 2.361885  | 0.798936  | -1.975417 |
| 6 | 1.646512  | -0.465760 | -2.164671 |
| 6 | 2.479959  | -1.529921 | -1.585823 |
| 6 | 3.530895  | -0.918170 | -0.900575 |
| 6 | 4.432346  | 1.527279  | -0.600344 |
| 1 | 5.359192  | 1.505510  | -1.191304 |
| 1 | 4.709636  | 1.314935  | 0.437619  |
| 1 | 4.037803  | 2.546019  | -0.639035 |
| 6 | 2.074950  | 2.101446  | -2.662398 |
| 1 | 2.657908  | 2.178009  | -3.591905 |
| 1 | 2.337771  | 2.959703  | -2.037271 |
| 1 | 1.022389  | 2.203830  | -2.928626 |
| 6 | 0.601176  | -0.708245 | -3.215098 |
| 1 | 1.075312  | -0.860284 | -4.196509 |
| 1 | -0.082355 | 0.138965  | -3.306875 |
| 1 | 0.009101  | -1.601764 | -2.995841 |
| 6 | 2.234888  | -2.998160 | -1.761111 |
| 1 | 2.613306  | -3.338670 | -2.735255 |
| 1 | 1.168026  | -3.240042 | -1.723266 |
| 1 | 2.736513  | -3.590733 | -0.990078 |

|    |           |           |           |
|----|-----------|-----------|-----------|
| 6  | 4.641523  | -1.596878 | -0.152182 |
| 1  | 5.522295  | -1.742584 | -0.794091 |
| 1  | 4.339041  | -2.581765 | 0.216334  |
| 1  | 4.969499  | -1.007011 | 0.709154  |
| 6  | 0.544869  | -1.762222 | 2.447070  |
| 6  | 0.390341  | -1.779651 | 0.912810  |
| 1  | -0.086016 | -0.981854 | 2.889858  |
| 1  | 0.135633  | -2.716357 | 2.818992  |
| 1  | 0.909037  | -2.665749 | 0.521544  |
| 1  | -0.669893 | -1.897595 | 0.675099  |
| 6  | 1.971902  | -1.606254 | 2.998382  |
| 1  | 1.991108  | -1.949247 | 4.043164  |
| 1  | 2.658002  | -2.266445 | 2.446199  |
| 6  | -3.109890 | 1.522211  | 0.741044  |
| 5  | -0.357859 | 1.052899  | 0.200156  |
| 45 | 1.336985  | -0.180502 | -0.049600 |
| 6  | 2.493997  | -0.166735 | 2.960970  |
| 1  | 2.462408  | 0.217226  | 1.917978  |
| 1  | 1.810204  | 0.480139  | 3.524218  |
| 6  | 3.915901  | -0.004301 | 3.505202  |
| 1  | 4.633634  | -0.622489 | 2.952108  |
| 1  | 4.252245  | 1.037611  | 3.448638  |
| 1  | 3.965493  | -0.311856 | 4.557369  |

**2V-2**

**HF = -1143.6417161 hartree**

|   |           |           |           |
|---|-----------|-----------|-----------|
| 6 | 1.845575  | 0.813504  | 0.296038  |
| 5 | 0.777181  | 1.767222  | 1.234654  |
| 1 | 0.472745  | 1.347923  | 2.309852  |
| 5 | -0.201093 | 2.690118  | 0.091929  |
| 1 | -1.321166 | 3.020681  | 0.344872  |
| 5 | 0.291058  | 2.184060  | -1.548119 |
| 1 | -0.471549 | 2.155119  | -2.472754 |
| 5 | 1.586664  | 0.977221  | -1.380311 |
| 1 | 1.791948  | 0.053661  | -2.096876 |
| 5 | 2.474507  | 2.244723  | 1.021370  |
| 1 | 3.226358  | 2.112837  | 1.940728  |
| 5 | 1.195788  | 3.462113  | 0.882603  |
| 1 | 1.064548  | 4.307739  | 1.717483  |
| 5 | 0.894682  | 3.723803  | -0.856018 |
| 1 | 0.539823  | 4.781822  | -1.285685 |
| 5 | 1.998780  | 2.660691  | -1.773299 |
| 1 | 2.438383  | 2.942194  | -2.848229 |
| 5 | 2.975447  | 1.765470  | -0.606765 |
| 1 | 4.068151  | 1.337130  | -0.795887 |
| 5 | 2.555991  | 3.451036  | -0.269389 |
| 1 | 3.400837  | 4.296871  | -0.268271 |
| 6 | 2.240401  | -0.532138 | 0.949129  |
| 1 | 2.318349  | -0.354633 | 2.027855  |
| 1 | 1.422455  | -1.237074 | 0.792914  |
| 6 | 3.517304  | -1.203749 | 0.489600  |
| 6 | 4.776149  | -0.744884 | 0.913813  |
| 1 | 4.838446  | 0.137390  | 1.543003  |
| 6 | 5.921551  | -1.421095 | 0.509133  |
| 1 | 6.903851  | -1.078678 | 0.826495  |
| 6 | 5.787078  | -2.542930 | -0.311788 |
| 1 | 6.652173  | -3.104220 | -0.654816 |
| 6 | 4.499919  | -2.927871 | -0.680353 |
| 1 | 4.346515  | -3.798978 | -1.317465 |

|    |           |           |           |
|----|-----------|-----------|-----------|
| 7  | 3.389476  | -2.289080 | -0.291685 |
| 6  | -3.709504 | 0.400931  | 0.271010  |
| 6  | -2.833462 | 0.233399  | 1.347722  |
| 6  | -2.298790 | -1.126370 | 1.254606  |
| 6  | -3.102170 | -1.840949 | 0.247468  |
| 6  | -3.898122 | -0.895623 | -0.394468 |
| 6  | -4.436821 | 1.656197  | -0.117088 |
| 1  | -5.479122 | 1.648424  | 0.236926  |
| 1  | -4.468226 | 1.776896  | -1.206325 |
| 1  | -3.947046 | 2.542841  | 0.294315  |
| 6  | -2.554182 | 1.208386  | 2.450502  |
| 1  | -2.734466 | 2.239577  | 2.136309  |
| 1  | -1.517616 | 1.153529  | 2.787496  |
| 1  | -3.202093 | 1.001778  | 3.316821  |
| 6  | -1.482604 | -1.797488 | 2.322396  |
| 1  | -2.122322 | -2.179111 | 3.134813  |
| 1  | -0.763685 | -1.100203 | 2.761495  |
| 1  | -0.919444 | -2.642986 | 1.915705  |
| 6  | -3.030534 | -3.316233 | -0.011558 |
| 1  | -3.636997 | -3.876556 | 0.715814  |
| 1  | -2.003712 | -3.687074 | 0.068239  |
| 1  | -3.395227 | -3.574421 | -1.011441 |
| 6  | -4.824585 | -1.112513 | -1.556169 |
| 1  | -5.879567 | -1.030099 | -1.254710 |
| 1  | -4.686983 | -2.101868 | -2.003529 |
| 1  | -4.661335 | -0.367962 | -2.345292 |
| 6  | -0.287850 | -1.679243 | -1.498544 |
| 1  | -0.832288 | -2.632699 | -1.555573 |
| 1  | 0.723560  | -1.870234 | -1.136748 |
| 1  | -0.202944 | -1.257561 | -2.513993 |
| 5  | 0.182143  | 0.972204  | -0.246462 |
| 45 | -1.469345 | -0.299106 | -0.526698 |

III-2

HF = -1222.2029287 hartree

|   |           |           |           |
|---|-----------|-----------|-----------|
| 6 | 1.820891  | 0.821718  | 0.410313  |
| 5 | 0.818160  | 1.884690  | 1.299048  |
| 1 | 0.281060  | 1.488289  | 2.282375  |
| 5 | 0.200513  | 3.074193  | 0.156358  |
| 1 | -0.854455 | 3.607040  | 0.324663  |
| 5 | 0.836741  | 2.635008  | -1.447817 |
| 1 | 0.265338  | 2.856175  | -2.472869 |
| 5 | 1.820941  | 1.181789  | -1.253034 |
| 1 | 1.972198  | 0.311485  | -2.048723 |
| 5 | 2.590843  | 2.031823  | 1.364540  |
| 1 | 3.159787  | 1.669141  | 2.350809  |
| 5 | 1.589738  | 3.481424  | 1.200132  |
| 1 | 1.490637  | 4.258496  | 2.103314  |
| 5 | 1.606128  | 3.949474  | -0.515474 |
| 1 | 1.517428  | 5.090108  | -0.863399 |
| 5 | 2.609645  | 2.773785  | -1.397047 |
| 1 | 3.243664  | 3.047178  | -2.372707 |
| 5 | 3.218997  | 1.604204  | -0.230117 |
| 1 | 4.226272  | 0.981329  | -0.335710 |
| 5 | 3.081445  | 3.302691  | 0.240903  |
| 1 | 4.061044  | 3.956390  | 0.446442  |
| 6 | 1.916625  | -0.630116 | 0.929745  |
| 1 | 1.967177  | -0.584247 | 2.022283  |
| 1 | 0.990803  | -1.144772 | 0.664344  |

S60

|    |           |           |           |
|----|-----------|-----------|-----------|
| 6  | 3.070745  | -1.476082 | 0.436400  |
| 6  | 4.328434  | -1.424380 | 1.060018  |
| 1  | 4.486769  | -0.735915 | 1.884299  |
| 6  | 5.354667  | -2.241555 | 0.599214  |
| 1  | 6.335625  | -2.211162 | 1.067722  |
| 6  | 5.103719  | -3.095372 | -0.476903 |
| 1  | 5.873377  | -3.751171 | -0.874837 |
| 6  | 3.825786  | -3.084210 | -1.031477 |
| 1  | 3.583809  | -3.735904 | -1.870918 |
| 7  | 2.828036  | -2.307840 | -0.591019 |
| 6  | -3.682417 | -0.308124 | 0.409328  |
| 6  | -2.738688 | 0.163505  | 1.408756  |
| 6  | -1.834909 | -0.915824 | 1.690776  |
| 6  | -2.122103 | -1.967341 | 0.778599  |
| 6  | -3.285725 | -1.598464 | 0.002640  |
| 6  | -4.914059 | 0.434466  | -0.018985 |
| 1  | -5.691094 | 0.383204  | 0.757722  |
| 1  | -5.342868 | 0.019454  | -0.937381 |
| 1  | -4.709774 | 1.494207  | -0.202738 |
| 6  | -2.907560 | 1.404149  | 2.239725  |
| 1  | -3.376015 | 2.209866  | 1.665065  |
| 1  | -1.942642 | 1.778188  | 2.591480  |
| 1  | -3.543084 | 1.219156  | 3.120301  |
| 6  | -0.952788 | -1.028701 | 2.901105  |
| 1  | -1.545023 | -1.352051 | 3.771710  |
| 1  | -0.482445 | -0.078055 | 3.159601  |
| 1  | -0.157504 | -1.767088 | 2.762236  |
| 6  | -1.479017 | -3.326398 | 0.765895  |
| 1  | -1.999187 | -4.022573 | 1.441883  |
| 1  | -0.431576 | -3.285643 | 1.080183  |
| 1  | -1.501853 | -3.778074 | -0.232253 |
| 6  | -3.950607 | -2.478988 | -1.018417 |
| 1  | -4.517323 | -3.299406 | -0.552589 |
| 1  | -3.220237 | -2.945245 | -1.692950 |
| 1  | -4.652159 | -1.915065 | -1.642021 |
| 6  | -1.001822 | -0.317531 | -2.655976 |
| 6  | -0.355436 | -1.302863 | -1.909369 |
| 1  | -0.441185 | 0.523913  | -3.048055 |
| 1  | -1.946936 | -0.527728 | -3.153918 |
| 1  | -0.822705 | -2.278097 | -1.790266 |
| 1  | 0.710344  | -1.280140 | -1.721894 |
| 6  | -2.327244 | 1.730751  | -1.454126 |
| 1  | -2.630888 | 2.405312  | -0.649109 |
| 1  | -1.669685 | 2.265655  | -2.133209 |
| 1  | -3.206791 | 1.365259  | -1.998893 |
| 5  | 0.273109  | 1.345463  | -0.325270 |
| 45 | -1.460409 | 0.032063  | -0.547323 |

**2TS1-2**

HF = -1222.1639075 hartree

$\nu^* = -452.0303 \text{ icm}^{-1}$

|   |           |          |           |
|---|-----------|----------|-----------|
| 6 | 1.874524  | 0.829700 | 0.410835  |
| 5 | 0.818466  | 1.818441 | 1.307726  |
| 1 | 0.392187  | 1.387866 | 2.331679  |
| 5 | 0.026531  | 2.896321 | 0.151477  |
| 1 | -1.078033 | 3.319094 | 0.334991  |
| 5 | 0.637794  | 2.461435 | -1.461041 |
| 1 | -0.008222 | 2.585729 | -2.458018 |
| 5 | 1.772708  | 1.120262 | -1.260641 |
| 1 | 1.977805  | 0.230701 | -2.023691 |

S61

|   |           |           |           |
|---|-----------|-----------|-----------|
| 5 | 2.562898  | 2.147515  | 1.284385  |
| 1 | 3.207193  | 1.883920  | 2.255762  |
| 5 | 1.412403  | 3.482565  | 1.117129  |
| 1 | 1.275776  | 4.281251  | 1.996317  |
| 5 | 1.308888  | 3.881102  | -0.614352 |
| 1 | 1.092760  | 4.992985  | -0.998477 |
| 5 | 2.389368  | 2.774534  | -1.499334 |
| 1 | 2.950342  | 3.071864  | -2.512409 |
| 5 | 3.162136  | 1.716346  | -0.319856 |
| 1 | 4.221432  | 1.191536  | -0.449080 |
| 5 | 2.874191  | 3.414070  | 0.094447  |
| 1 | 3.790294  | 4.169905  | 0.231172  |
| 6 | 2.104530  | -0.586145 | 0.984658  |
| 1 | 2.175058  | -0.488611 | 2.073312  |
| 1 | 1.216090  | -1.181878 | 0.765171  |
| 6 | 3.314219  | -1.353912 | 0.497341  |
| 6 | 4.585710  | -1.135412 | 1.054171  |
| 1 | 4.709527  | -0.374150 | 1.818098  |
| 6 | 5.667295  | -1.885334 | 0.606133  |
| 1 | 6.658668  | -1.726468 | 1.024165  |
| 6 | 5.457528  | -2.840511 | -0.390840 |
| 1 | 6.270638  | -3.450521 | -0.775163 |
| 6 | 4.163248  | -2.992092 | -0.883385 |
| 1 | 3.952171  | -3.726994 | -1.660284 |
| 7 | 3.113156  | -2.280927 | -0.454816 |
| 6 | -3.686331 | 0.091134  | 0.552751  |
| 6 | -2.697304 | 0.298815  | 1.539566  |
| 6 | -1.919976 | -0.923879 | 1.643765  |
| 6 | -2.534903 | -1.902265 | 0.770666  |
| 6 | -3.591809 | -1.274096 | 0.078220  |
| 6 | -4.712091 | 1.079669  | 0.079732  |
| 1 | -5.734282 | 0.722544  | 0.270229  |
| 1 | -4.636633 | 1.263630  | -1.002284 |
| 1 | -4.599941 | 2.045468  | 0.580435  |
| 6 | -2.591027 | 1.485012  | 2.453748  |
| 1 | -2.997229 | 2.390888  | 1.994172  |
| 1 | -1.554575 | 1.699992  | 2.717304  |
| 1 | -3.145087 | 1.307880  | 3.389242  |
| 6 | -0.999995 | -1.263726 | 2.784089  |
| 1 | -1.572356 | -1.573293 | 3.673691  |
| 1 | -0.382840 | -0.409417 | 3.070442  |
| 1 | -0.326242 | -2.088554 | 2.529764  |
| 6 | -2.141388 | -3.350307 | 0.687092  |
| 1 | -2.655735 | -3.949950 | 1.453307  |
| 1 | -1.065379 | -3.483077 | 0.837642  |
| 1 | -2.392334 | -3.787718 | -0.285847 |
| 6 | -4.514202 | -1.892934 | -0.934373 |
| 1 | -5.494174 | -2.147012 | -0.501376 |
| 1 | -4.097987 | -2.817104 | -1.350773 |
| 1 | -4.710966 | -1.214116 | -1.774686 |
| 6 | -0.790765 | -0.585231 | -2.681498 |
| 6 | -0.297840 | -1.467544 | -1.642915 |
| 1 | -0.049300 | 0.075392  | -3.118718 |
| 1 | -1.464514 | -1.025994 | -3.416467 |
| 1 | -0.753269 | -2.459261 | -1.588342 |
| 1 | 0.771206  | -1.482091 | -1.454061 |
| 6 | -2.159153 | 0.847118  | -2.416824 |
| 1 | -2.242795 | 1.689697  | -1.728121 |

|    |           |           |           |
|----|-----------|-----------|-----------|
| 1  | -1.798046 | 1.257651  | -3.358065 |
| 1  | -3.118251 | 0.348175  | -2.565496 |
| 5  | 0.257530  | 1.171223  | -0.273516 |
| 45 | -1.419361 | -0.178909 | -0.465145 |

**INT3-2**

**HF = -1222.2091269 hartree**

|   |           |           |           |
|---|-----------|-----------|-----------|
| 6 | -1.962428 | 0.905715  | -0.259435 |
| 5 | -0.953678 | 2.077880  | -0.993789 |
| 1 | -0.665939 | 1.910292  | -2.137325 |
| 5 | 0.025257  | 2.771585  | 0.300027  |
| 1 | 1.126447  | 3.192226  | 0.101085  |
| 5 | -0.402448 | 1.907804  | 1.804081  |
| 1 | 0.386105  | 1.708302  | 2.685756  |
| 5 | -1.664934 | 0.718868  | 1.405781  |
| 1 | -1.829125 | -0.342117 | 1.909692  |
| 5 | -2.659124 | 2.433585  | -0.648193 |
| 1 | -3.432175 | 2.475269  | -1.557844 |
| 5 | -1.418324 | 3.639682  | -0.276927 |
| 1 | -1.337173 | 4.648654  | -0.913123 |
| 5 | -1.075858 | 3.536099  | 1.471125  |
| 1 | -0.743173 | 4.490686  | 2.109512  |
| 5 | -2.118407 | 2.260198  | 2.160306  |
| 1 | -2.536287 | 2.288110  | 3.279418  |
| 5 | -3.098516 | 1.599472  | 0.848424  |
| 1 | -4.170266 | 1.098483  | 0.964448  |
| 5 | -2.743006 | 3.332141  | 0.873880  |
| 1 | -3.613561 | 4.126525  | 1.073188  |
| 6 | -2.337018 | -0.294062 | -1.161444 |
| 1 | -2.431479 | 0.086707  | -2.184680 |
| 1 | -1.505661 | -1.001485 | -1.150460 |
| 6 | -3.598853 | -1.056831 | -0.818416 |
| 6 | -4.863764 | -0.572602 | -1.192574 |
| 1 | -4.940229 | 0.382454  | -1.702900 |
| 6 | -5.998086 | -1.315500 | -0.885483 |
| 1 | -6.985313 | -0.953574 | -1.163447 |
| 6 | -5.845818 | -2.529013 | -0.211433 |
| 1 | -6.701549 | -3.144512 | 0.052982  |
| 6 | -4.553006 | -2.933451 | 0.114972  |
| 1 | -4.386184 | -3.875024 | 0.638241  |
| 7 | -3.453146 | -2.230258 | -0.181043 |
| 6 | 3.568863  | 0.801820  | -0.595898 |
| 6 | 2.611676  | 0.684033  | -1.605827 |
| 6 | 2.209024  | -0.725484 | -1.656856 |
| 6 | 3.160815  | -1.473688 | -0.819684 |
| 6 | 3.924699  | -0.539792 | -0.124227 |
| 6 | 4.229092  | 2.066505  | -0.127276 |
| 1 | 5.229217  | 2.192084  | -0.570916 |
| 1 | 4.358280  | 2.073368  | 0.961558  |
| 1 | 3.633023  | 2.944605  | -0.390121 |
| 6 | 2.166813  | 1.766764  | -2.543046 |
| 1 | 1.976557  | 2.709427  | -2.022073 |
| 1 | 1.246330  | 1.497273  | -3.062840 |
| 1 | 2.939455  | 1.950338  | -3.305665 |
| 6 | 1.396096  | -1.345868 | -2.759032 |
| 1 | 2.016565  | -1.550556 | -3.646793 |
| 1 | 0.579036  | -0.688308 | -3.069025 |
| 1 | 0.953231  | -2.294281 | -2.439475 |
| 6 | 3.270997  | -2.968890 | -0.775142 |

|    |           |           |           |
|----|-----------|-----------|-----------|
| 1  | 3.854134  | -3.348944 | -1.627793 |
| 1  | 2.288123  | -3.449655 | -0.820114 |
| 1  | 3.761964  | -3.316187 | 0.139823  |
| 6  | 4.978270  | -0.803924 | 0.912407  |
| 1  | 5.981773  | -0.548956 | 0.540608  |
| 1  | 4.996453  | -1.854941 | 1.215775  |
| 1  | 4.813708  | -0.202133 | 1.815321  |
| 6  | 0.489230  | -1.972621 | 2.476712  |
| 6  | 0.351902  | -1.855431 | 0.948065  |
| 1  | 0.174564  | -1.036534 | 2.956041  |
| 1  | -0.223068 | -2.735352 | 2.836856  |
| 1  | 0.791376  | -2.746780 | 0.474641  |
| 1  | -0.705637 | -1.840181 | 0.683416  |
| 6  | 1.889227  | -2.351926 | 2.978969  |
| 1  | 2.629817  | -1.588974 | 2.710882  |
| 1  | 1.906142  | -2.466715 | 4.071197  |
| 1  | 2.222690  | -3.302032 | 2.538915  |
| 5  | -0.291026 | 1.007053  | 0.270817  |
| 45 | 1.421950  | -0.204714 | 0.262728  |

**IV-2**

**HF = -1300.7588676 hartree**

|   |           |           |           |
|---|-----------|-----------|-----------|
| 6 | 1.939744  | 0.880531  | 0.472791  |
| 5 | 0.895093  | 1.611569  | 1.597961  |
| 1 | 0.558913  | 0.994148  | 2.555864  |
| 5 | -0.036580 | 2.820373  | 0.732617  |
| 1 | -1.117554 | 3.135338  | 1.121464  |
| 5 | 0.450987  | 2.731933  | -0.980169 |
| 1 | -0.272515 | 2.992816  | -1.892636 |
| 5 | 1.675643  | 1.458214  | -1.109851 |
| 1 | 1.868959  | 0.750840  | -2.046739 |
| 5 | 2.616368  | 2.068664  | 1.517557  |
| 1 | 3.350078  | 1.682275  | 2.377995  |
| 5 | 1.386097  | 3.320892  | 1.680774  |
| 1 | 1.270515  | 3.935731  | 2.699646  |
| 5 | 1.112325  | 4.017479  | 0.067309  |
| 1 | 0.797800  | 5.160959  | -0.086233 |
| 5 | 2.173643  | 3.169291  | -1.082086 |
| 1 | 2.630691  | 3.681466  | -2.060586 |
| 5 | 3.102678  | 1.977092  | -0.177386 |
| 1 | 4.173580  | 1.560424  | -0.482462 |
| 5 | 2.755041  | 3.546801  | 0.562279  |
| 1 | 3.634637  | 4.328674  | 0.771621  |
| 6 | 2.343726  | -0.576763 | 0.797774  |
| 1 | 2.454216  | -0.641853 | 1.884853  |
| 1 | 1.519904  | -1.235988 | 0.518892  |
| 6 | 3.611261  | -1.109694 | 0.163208  |
| 6 | 4.866803  | -0.885866 | 0.752582  |
| 1 | 4.933343  | -0.288817 | 1.656694  |
| 6 | 6.006141  | -1.414524 | 0.156321  |
| 1 | 6.986226  | -1.246677 | 0.596715  |
| 6 | 5.869164  | -2.158087 | -1.017690 |
| 1 | 6.729442  | -2.589640 | -1.522119 |
| 6 | 4.585589  | -2.333695 | -1.529587 |
| 1 | 4.429958  | -2.908609 | -2.442340 |
| 7 | 3.481413  | -1.835231 | -0.960112 |
| 6 | -3.392373 | -1.046482 | 0.606963  |
| 6 | -2.475382 | -0.545736 | 1.611676  |
| 6 | -1.416887 | -1.511313 | 1.739022  |



|    |           |           |           |
|----|-----------|-----------|-----------|
| 6  | -1.628639 | -2.521594 | 0.760296  |
| 6  | -2.852514 | -2.234742 | 0.063078  |
| 6  | -4.761117 | -0.511487 | 0.288527  |
| 1  | -5.518936 | -1.291665 | 0.443397  |
| 1  | -4.855876 | -0.171907 | -0.750852 |
| 1  | -5.025886 | 0.330105  | 0.933360  |
| 6  | -2.757869 | 0.545274  | 2.608079  |
| 1  | -3.269736 | 0.149981  | 3.499983  |
| 1  | -3.391301 | 1.331011  | 2.186881  |
| 1  | -1.834223 | 1.026955  | 2.939711  |
| 6  | -0.460478 | -1.623717 | 2.892374  |
| 1  | -0.911063 | -2.215130 | 3.705551  |
| 1  | -0.196778 | -0.648224 | 3.302890  |
| 1  | 0.470863  | -2.124725 | 2.609910  |
| 6  | -0.826015 | -3.784709 | 0.622853  |
| 1  | -1.193285 | -4.563294 | 1.308847  |
| 1  | 0.232703  | -3.625045 | 0.851146  |
| 1  | -0.887186 | -4.202542 | -0.388511 |
| 6  | -3.483627 | -3.082176 | -1.006791 |
| 1  | -4.091472 | -3.900091 | -0.589197 |
| 1  | -2.731213 | -3.548444 | -1.655111 |
| 1  | -4.143128 | -2.487725 | -1.649173 |
| 6  | -0.715319 | -0.648135 | -2.523934 |
| 6  | 0.117858  | -1.445934 | -1.750799 |
| 1  | -0.330412 | 0.272996  | -2.946202 |
| 1  | -1.603881 | -1.055188 | -3.002320 |
| 1  | -0.127901 | -2.491208 | -1.587362 |
| 1  | 1.157121  | -1.189943 | -1.600362 |
| 6  | -2.427161 | 1.135071  | -1.496616 |
| 1  | -1.819461 | 1.573033  | -2.287150 |
| 1  | -3.164372 | 0.466924  | -1.969863 |
| 5  | 0.232690  | 1.220497  | -0.044246 |
| 45 | -1.263592 | -0.325264 | -0.408942 |
| 6  | -3.144322 | 2.268561  | -0.770394 |
| 1  | -3.692519 | 1.907865  | 0.105163  |
| 1  | -2.413524 | 2.987673  | -0.400341 |
| 6  | -4.129885 | 2.998739  | -1.702503 |
| 1  | -4.915920 | 2.323797  | -2.069364 |
| 1  | -4.620604 | 3.835593  | -1.186715 |
| 1  | -3.610573 | 3.406455  | -2.578946 |

**2TS2-2**

HF = -1300.7186481 hartree

$v^{\ddagger} = -346.4976 \text{ icm}^{-1}$

|   |           |          |           |
|---|-----------|----------|-----------|
| 6 | 2.010376  | 0.824862 | 0.531952  |
| 5 | 0.944116  | 1.544540 | 1.650817  |
| 1 | 0.605392  | 0.917512 | 2.602402  |
| 5 | 0.007674  | 2.745803 | 0.761058  |
| 1 | -1.101867 | 3.042131 | 1.092354  |
| 5 | 0.542882  | 2.660329 | -0.937051 |
| 1 | -0.151377 | 2.907917 | -1.876445 |
| 5 | 1.780278  | 1.406932 | -1.043880 |
| 1 | 2.000823  | 0.701900 | -1.975753 |
| 5 | 2.658473  | 2.011888 | 1.601469  |
| 1 | 3.379607  | 1.630671 | 2.474638  |
| 5 | 1.409514  | 3.256923 | 1.743890  |
| 1 | 1.271461  | 3.868241 | 2.762163  |
| 5 | 1.162430  | 3.954582 | 0.125570  |
| 1 | 0.841157  | 5.095882 | -0.032159 |
| 5 | 2.259601  | 3.121749 | -1.001947 |

|    |           |           |           |
|----|-----------|-----------|-----------|
| 1  | 2.728306  | 3.642257  | -1.970683 |
| 5  | 3.181222  | 1.936379  | -0.082443 |
| 1  | 4.263346  | 1.533077  | -0.364648 |
| 5  | 2.800141  | 3.498037  | 0.655889  |
| 1  | 3.666056  | 4.289612  | 0.885193  |
| 6  | 2.393001  | -0.646984 | 0.802057  |
| 1  | 2.503746  | -0.764210 | 1.885079  |
| 1  | 1.554716  | -1.271338 | 0.487833  |
| 6  | 3.642052  | -1.182722 | 0.136221  |
| 6  | 4.913662  | -0.964902 | 0.692898  |
| 1  | 5.006070  | -0.366614 | 1.594086  |
| 6  | 6.034307  | -1.503392 | 0.070776  |
| 1  | 7.026263  | -1.341061 | 0.486090  |
| 6  | 5.862336  | -2.250526 | -1.096427 |
| 1  | 6.706681  | -2.690356 | -1.620433 |
| 6  | 4.564795  | -2.419980 | -1.574544 |
| 1  | 4.383018  | -2.998652 | -2.480178 |
| 7  | 3.477675  | -1.912320 | -0.980479 |
| 6  | -3.451386 | -0.820692 | 0.946175  |
| 6  | -2.403907 | -0.534346 | 1.841479  |
| 6  | -1.355815 | -1.518926 | 1.616001  |
| 6  | -1.848862 | -2.452671 | 0.623642  |
| 6  | -3.108193 | -2.003217 | 0.183729  |
| 6  | -4.766316 | -0.106492 | 0.820699  |
| 1  | -5.592172 | -0.726213 | 1.201093  |
| 1  | -5.008093 | 0.129518  | -0.224313 |
| 1  | -4.777663 | 0.832751  | 1.381188  |
| 6  | -2.414446 | 0.479632  | 2.949481  |
| 1  | -2.660065 | 0.010445  | 3.915553  |
| 1  | -3.154753 | 1.266923  | 2.773140  |
| 1  | -1.442866 | 0.967132  | 3.057415  |
| 6  | -0.300886 | -1.870854 | 2.630325  |
| 1  | -0.746149 | -2.442136 | 3.461250  |
| 1  | 0.169788  | -0.983316 | 3.056836  |
| 1  | 0.489107  | -2.492910 | 2.198894  |
| 6  | -1.153453 | -3.723364 | 0.221840  |
| 1  | -1.377243 | -4.539842 | 0.925199  |
| 1  | -0.066024 | -3.599265 | 0.200296  |
| 1  | -1.462899 | -4.063049 | -0.772928 |
| 6  | -3.998598 | -2.646599 | -0.842155 |
| 1  | -4.827159 | -3.206429 | -0.380961 |
| 1  | -3.446467 | -3.352884 | -1.472088 |
| 1  | -4.458559 | -1.904774 | -1.508618 |
| 6  | -0.823650 | -0.156417 | -2.639740 |
| 6  | -0.124714 | -1.151020 | -1.838063 |
| 1  | -0.239369 | 0.705463  | -2.947030 |
| 1  | -1.438246 | -0.568116 | -3.439712 |
| 1  | -0.444123 | -2.185840 | -1.987530 |
| 1  | 0.951747  | -1.058416 | -1.738784 |
| 6  | -2.477839 | 0.838226  | -2.089982 |
| 1  | -2.406175 | 1.211646  | -3.114433 |
| 1  | -3.250703 | 0.062707  | -2.085552 |
| 5  | 0.320219  | 1.146096  | 0.009567  |
| 45 | -1.240749 | -0.322402 | -0.329855 |
| 6  | -2.885412 | 2.052327  | -1.243017 |
| 1  | -3.101427 | 1.772561  | -0.210456 |
| 1  | -2.065233 | 2.767643  | -1.200486 |
| 6  | -4.118225 | 2.742074  | -1.859095 |

|   |           |          |           |
|---|-----------|----------|-----------|
| 1 | -4.982468 | 2.066079 | -1.912165 |
| 1 | -4.411723 | 3.613686 | -1.260305 |
| 1 | -3.910211 | 3.093591 | -2.878431 |

**INT4-2**

**HF = -1300.7769235 hartree**

|   |           |           |           |
|---|-----------|-----------|-----------|
| 6 | -2.201785 | 0.940672  | -0.059771 |
| 5 | -1.300413 | 2.279395  | -0.623576 |
| 1 | -1.134250 | 2.366741  | -1.798556 |
| 5 | -0.205039 | 2.731950  | 0.685154  |
| 1 | 0.861415  | 3.229317  | 0.471979  |
| 5 | -0.460018 | 1.558094  | 2.007861  |
| 1 | 0.417870  | 1.216698  | 2.748203  |
| 5 | -1.730803 | 0.426009  | 1.489799  |
| 1 | -1.826044 | -0.722452 | 1.768221  |
| 5 | -2.966916 | 2.486918  | -0.046972 |
| 1 | -3.829457 | 2.683226  | -0.850043 |
| 5 | -1.718381 | 3.640476  | 0.446838  |
| 1 | -1.723831 | 4.761641  | 0.031849  |
| 5 | -1.195093 | 3.189858  | 2.091771  |
| 1 | -0.817557 | 4.003358  | 2.882466  |
| 5 | -2.135312 | 1.756903  | 2.594660  |
| 1 | -2.434932 | 1.533714  | 3.729662  |
| 5 | -3.232497 | 1.343544  | 1.274852  |
| 1 | -4.276318 | 0.785950  | 1.387179  |
| 5 | -2.910848 | 3.046099  | 1.630264  |
| 1 | -3.772655 | 3.744649  | 2.075160  |
| 6 | -2.643004 | -0.056675 | -1.156672 |
| 1 | -2.874800 | 0.530287  | -2.052657 |
| 1 | -1.793790 | -0.698996 | -1.397074 |
| 6 | -3.824568 | -0.954405 | -0.857108 |
| 6 | -5.142365 | -0.476192 | -0.951579 |
| 1 | -5.315160 | 0.565488  | -1.203357 |
| 6 | -6.202302 | -1.341032 | -0.703552 |
| 1 | -7.228622 | -0.987136 | -0.768635 |
| 6 | -5.924138 | -2.667306 | -0.366147 |
| 1 | -6.717773 | -3.380834 | -0.161108 |
| 6 | -4.587403 | -3.054886 | -0.300526 |
| 1 | -4.323263 | -4.080813 | -0.043908 |
| 7 | -3.558829 | -2.233368 | -0.543920 |
| 6 | 3.250575  | 1.177235  | -1.045404 |
| 6 | 2.157750  | 1.184569  | -1.914280 |
| 6 | 1.799097  | -0.214492 | -2.171332 |
| 6 | 2.894212  | -1.039506 | -1.634699 |
| 6 | 3.723250  | -0.201619 | -0.895555 |
| 6 | 3.929078  | 2.380163  | -0.455382 |
| 1 | 4.817925  | 2.673413  | -1.036016 |
| 1 | 4.265256  | 2.191477  | 0.570948  |
| 1 | 3.251541  | 3.237928  | -0.424099 |
| 6 | 1.559762  | 2.394226  | -2.569166 |
| 1 | 2.249260  | 2.788493  | -3.331534 |
| 1 | 1.357426  | 3.195479  | -1.852596 |
| 1 | 0.616807  | 2.161627  | -3.065690 |
| 6 | 0.852266  | -0.675690 | -3.244388 |
| 1 | 1.340090  | -0.691469 | -4.232697 |
| 1 | -0.017998 | -0.017134 | -3.311707 |
| 1 | 0.484906  | -1.686367 | -3.039982 |
| 6 | 3.069918  | -2.506901 | -1.890259 |
| 1 | 3.545950  | -2.685130 | -2.866578 |

|    |           |           |           |
|----|-----------|-----------|-----------|
| 1  | 2.111104  | -3.035471 | -1.901884 |
| 1  | 3.696640  | -2.983192 | -1.128397 |
| 6  | 4.947273  | -0.583693 | -0.114903 |
| 1  | 5.867483  | -0.273175 | -0.632415 |
| 1  | 5.008261  | -1.665028 | 0.042029  |
| 1  | 4.963017  | -0.105592 | 0.871407  |
| 6  | 0.474590  | -2.403932 | 1.765390  |
| 6  | 0.325946  | -1.909091 | 0.312108  |
| 1  | -0.062701 | -1.734321 | 2.447756  |
| 1  | -0.055435 | -3.370252 | 1.829451  |
| 1  | 0.805398  | -2.643979 | -0.352427 |
| 1  | -0.737807 | -1.905514 | 0.065960  |
| 6  | 1.903373  | -2.615618 | 2.305856  |
| 1  | 1.870880  | -3.367774 | 3.109964  |
| 1  | 2.542575  | -3.042838 | 1.516910  |
| 5  | -0.482420 | 0.999578  | 0.318546  |
| 45 | 1.260608  | -0.094032 | -0.102170 |
| 6  | 2.563159  | -1.352276 | 2.872500  |
| 1  | 2.632833  | -0.588611 | 2.081783  |
| 1  | 1.908113  | -0.921550 | 3.641444  |
| 6  | 3.952225  | -1.604882 | 3.468593  |
| 1  | 4.642677  | -2.010055 | 2.717843  |
| 1  | 4.394941  | -0.682841 | 3.865763  |
| 1  | 3.901718  | -2.330096 | 4.292137  |

**3V**

**HF = -1140.4766668 hartree**

|   |           |           |           |
|---|-----------|-----------|-----------|
| 7 | -2.996749 | -1.902244 | -0.367138 |
| 6 | -1.605234 | 1.275212  | -0.554839 |
| 6 | -2.094883 | 0.097195  | -1.418559 |
| 1 | -2.326724 | 0.506971  | -2.407167 |
| 1 | -1.258681 | -0.592827 | -1.530504 |
| 6 | -3.278447 | -0.710458 | -0.921660 |
| 6 | -4.595628 | -0.261891 | -1.088427 |
| 1 | -4.787969 | 0.695307  | -1.561724 |
| 6 | -5.646678 | -1.058311 | -0.640034 |
| 1 | -6.675060 | -0.727559 | -0.756927 |
| 6 | -5.354350 | -2.285392 | -0.045619 |
| 1 | -6.139466 | -2.940815 | 0.318788  |
| 6 | -4.015467 | -2.658826 | 0.060810  |
| 1 | -3.742747 | -3.614199 | 0.505758  |
| 6 | 3.370167  | -0.466542 | -0.423845 |
| 6 | 3.240012  | -1.355534 | 0.716382  |
| 1 | 3.908273  | -1.209757 | 1.560970  |
| 6 | 2.403505  | -2.493302 | 0.706352  |
| 1 | 2.427654  | -3.195296 | 1.532798  |
| 6 | 1.382789  | -2.588600 | -0.283059 |
| 6 | 1.346723  | -1.547036 | -1.272907 |
| 1 | 0.565780  | -1.577053 | -2.025339 |
| 6 | 2.419092  | -0.597679 | -1.424164 |
| 1 | 2.396680  | 0.087476  | -2.262629 |
| 6 | 4.493529  | 0.557611  | -0.429228 |
| 1 | 4.484173  | 1.037011  | 0.560807  |
| 6 | 5.854179  | -0.157902 | -0.584806 |
| 1 | 6.672832  | 0.566009  | -0.506919 |
| 1 | 5.925567  | -0.646639 | -1.563785 |
| 1 | 6.006757  | -0.922519 | 0.184719  |
| 6 | 4.336691  | 1.659022  | -1.484741 |
| 1 | 3.384785  | 2.188228  | -1.380766 |

|    |           |           |           |
|----|-----------|-----------|-----------|
| 1  | 4.400523  | 1.252493  | -2.501662 |
| 1  | 5.142586  | 2.392597  | -1.377043 |
| 6  | 0.383667  | -3.712938 | -0.317010 |
| 1  | 0.679899  | -4.454235 | -1.071070 |
| 1  | -0.613283 | -3.336693 | -0.569639 |
| 1  | 0.322048  | -4.220093 | 0.649700  |
| 5  | -0.123996 | 1.947470  | -1.060446 |
| 1  | 0.408738  | 1.465561  | -2.003310 |
| 5  | 0.684067  | 2.494864  | 0.406287  |
| 1  | 1.867787  | 2.406963  | 0.480720  |
| 5  | -0.342757 | 2.060493  | 1.772477  |
| 1  | 0.133036  | 1.677023  | 2.792597  |
| 5  | -1.775000 | 1.250176  | 1.139935  |
| 1  | -2.326196 | 0.337630  | 1.644237  |
| 1  | -3.831432 | 2.266708  | -0.004011 |
| 5  | -1.634065 | 2.861488  | -1.227110 |
| 1  | -2.100102 | 2.969786  | -2.314582 |
| 5  | -0.184982 | 3.664084  | -0.610018 |
| 1  | 0.398989  | 4.471779  | -1.259446 |
| 5  | -0.329890 | 3.736517  | 1.172078  |
| 1  | 0.155112  | 4.612583  | 1.814160  |
| 5  | -1.871906 | 2.955779  | 1.631907  |
| 1  | -2.502342 | 3.264580  | 2.591447  |
| 5  | -1.771424 | 3.958468  | 0.155753  |
| 1  | -2.346784 | 4.994832  | 0.054622  |
| 6  | -0.216585 | -1.438306 | 2.073861  |
| 1  | 0.113083  | -2.427292 | 2.410942  |
| 1  | -0.186793 | -0.734737 | 2.919165  |
| 1  | -1.240577 | -1.502995 | 1.703444  |
| 5  | -2.665754 | 2.423203  | 0.142029  |
| 6  | -0.229372 | 1.034599  | 0.404094  |
| 44 | 1.104031  | -0.642804 | 0.679354  |

|          |                                   |           |           |
|----------|-----------------------------------|-----------|-----------|
| <b>V</b> | <b>HF = -1219.0297636 hartree</b> |           |           |
| 6        | -1.715686                         | 0.989343  | -0.513670 |
| 5        | -0.384048                         | 1.729045  | -1.259272 |
| 1        | 0.161070                          | 1.149224  | -2.136018 |
| 5        | 0.402938                          | 2.737430  | -0.051213 |
| 1        | 1.578404                          | 2.889727  | -0.096540 |
| 5        | -0.465472                         | 2.493050  | 1.463852  |
| 1        | 0.060114                          | 2.485652  | 2.524760  |
| 5        | -1.747133                         | 1.326751  | 1.147700  |
| 1        | -2.112917                         | 0.506920  | 1.914518  |
| 5        | -2.039044                         | 2.337898  | -1.504993 |
| 1        | -2.553804                         | 2.109538  | -2.552664 |
| 5        | -0.714974                         | 3.473490  | -1.221026 |
| 1        | -0.311590                         | 4.177991  | -2.091257 |
| 5        | -0.779791                         | 3.952871  | 0.494035  |
| 1        | -0.419945                         | 5.021323  | 0.874387  |
| 5        | -2.127366                         | 3.067673  | 1.257801  |
| 1        | -2.743120                         | 3.487518  | 2.184848  |
| 1        | -4.028741                         | 1.716850  | 0.033063  |
| 5        | -2.287880                         | 3.700931  | -0.404220 |
| 1        | -3.037677                         | 4.581013  | -0.685630 |
| 6        | -2.070710                         | -0.409081 | -1.044777 |
| 1        | -1.993935                         | -0.370323 | -2.136014 |
| 1        | -1.312858                         | -1.105829 | -0.682710 |
| 6        | -3.434389                         | -0.951629 | -0.665086 |

|    |           |           |           |
|----|-----------|-----------|-----------|
| 6  | -4.551230 | -0.744171 | -1.485190 |
| 1  | -4.452853 | -0.165467 | -2.398778 |
| 6  | -5.780398 | -1.276652 | -1.103515 |
| 1  | -6.661305 | -1.126332 | -1.721705 |
| 6  | -5.858194 | -2.002120 | 0.085318  |
| 1  | -6.794089 | -2.435118 | 0.425152  |
| 6  | -4.692389 | -2.163048 | 0.833272  |
| 1  | -4.706948 | -2.726319 | 1.764875  |
| 7  | -3.505379 | -1.660815 | 0.472636  |
| 6  | 0.504246  | -0.858306 | 2.704865  |
| 6  | -0.277854 | -1.608996 | 1.820226  |
| 1  | 0.096106  | 0.046693  | 3.142074  |
| 1  | 1.304104  | -1.324481 | 3.275989  |
| 1  | -0.064067 | -2.667177 | 1.687628  |
| 1  | -1.296687 | -1.328260 | 1.581978  |
| 6  | 2.332269  | 0.868850  | 1.925853  |
| 1  | 2.850715  | 1.564311  | 1.259405  |
| 1  | 1.728558  | 1.449326  | 2.617497  |
| 1  | 3.062888  | 0.284300  | 2.495944  |
| 6  | 3.409370  | -0.540266 | -0.592530 |
| 6  | 3.264447  | -1.602019 | 0.357451  |
| 1  | 3.985946  | -1.699563 | 1.162422  |
| 6  | 2.235106  | -2.549651 | 0.235031  |
| 1  | 2.179715  | -3.367785 | 0.947685  |
| 6  | 1.305753  | -2.501196 | -0.853017 |
| 6  | 1.361358  | -1.376761 | -1.680604 |
| 1  | 0.631646  | -1.253830 | -2.473782 |
| 6  | 2.397406  | -0.401552 | -1.547949 |
| 1  | 2.407397  | 0.434004  | -2.236141 |
| 6  | 4.633177  | 0.358048  | -0.526720 |
| 1  | 4.779079  | 0.621233  | 0.529431  |
| 6  | 5.876414  | -0.439716 | -0.982313 |
| 1  | 6.775927  | 0.176331  | -0.875206 |
| 1  | 5.789151  | -0.730729 | -2.035799 |
| 1  | 6.019019  | -1.350606 | -0.390724 |
| 6  | 4.507329  | 1.661964  | -1.325702 |
| 1  | 3.624064  | 2.239173  | -1.035120 |
| 1  | 4.452686  | 1.470425  | -2.404423 |
| 1  | 5.389908  | 2.286199  | -1.151575 |
| 6  | 0.321777  | -3.618316 | -1.083787 |
| 1  | -0.131715 | -3.963239 | -0.149146 |
| 1  | 0.830946  | -4.479160 | -1.536697 |
| 1  | -0.481394 | -3.312249 | -1.759773 |
| 5  | -2.904339 | 2.089624  | 0.014581  |
| 6  | -0.185741 | 1.186624  | 0.385763  |
| 44 | 1.219933  | -0.462216 | 0.669906  |

**3TS1**

**HF = -1219.0007889 hartree**

$\nu^* = -442.5156 \text{ icm}^{-1}$

|   |           |          |           |
|---|-----------|----------|-----------|
| 6 | -1.748791 | 0.994634 | -0.509064 |
| 5 | -0.432723 | 1.720568 | -1.299229 |
| 1 | 0.032606  | 1.175203 | -2.240563 |
| 5 | 0.464661  | 2.606000 | -0.074927 |
| 1 | 1.646848  | 2.684058 | -0.158677 |
| 5 | -0.329372 | 2.319447 | 1.466210  |
| 1 | 0.276567  | 2.216838 | 2.478053  |
| 5 | -1.689764 | 1.241909 | 1.167911  |
| 1 | -2.056907 | 0.389121 | 1.897490  |
| 5 | -2.066120 | 2.414818 | -1.408340 |

S70

|   |           |           |           |
|---|-----------|-----------|-----------|
| 1 | -2.655090 | 2.274383  | -2.431717 |
| 5 | -0.671236 | 3.470169  | -1.136568 |
| 1 | -0.280499 | 4.206115  | -1.986196 |
| 5 | -0.616768 | 3.847646  | 0.603829  |
| 1 | -0.179896 | 4.872018  | 1.023297  |
| 5 | -1.966385 | 2.988228  | 1.394989  |
| 1 | -2.509112 | 3.383101  | 2.377177  |
| 1 | -3.998694 | 1.804780  | 0.198193  |
| 5 | -2.183628 | 3.721019  | -0.219701 |
| 1 | -2.900475 | 4.651973  | -0.408001 |
| 6 | -2.184902 | -0.367202 | -1.074513 |
| 1 | -2.146788 | -0.296175 | -2.166374 |
| 1 | -1.443728 | -1.103255 | -0.757122 |
| 6 | -3.554508 | -0.864587 | -0.658966 |
| 6 | -4.697832 | -0.545971 | -1.403930 |
| 1 | -4.613629 | 0.087962  | -2.281693 |
| 6 | -5.933289 | -1.041515 | -0.994705 |
| 1 | -6.834202 | -0.805749 | -1.554726 |
| 6 | -5.990298 | -1.843178 | 0.145335  |
| 1 | -6.929824 | -2.252926 | 0.503634  |
| 6 | -4.799200 | -2.112489 | 0.818778  |
| 1 | -4.798421 | -2.738263 | 1.709747  |
| 7 | -3.605825 | -1.645457 | 0.432064  |
| 6 | 0.512157  | -0.869779 | 2.756226  |
| 6 | -0.138161 | -1.658082 | 1.736692  |
| 1 | -0.091864 | -0.077962 | 3.186625  |
| 1 | 1.109259  | -1.405481 | 3.491454  |
| 1 | 0.096405  | -2.723598 | 1.723604  |
| 1 | -1.184706 | -1.453715 | 1.530046  |
| 6 | 2.110162  | 0.332388  | 2.466205  |
| 1 | 2.357390  | 1.139567  | 1.774211  |
| 1 | 1.786242  | 0.815572  | 3.384920  |
| 1 | 2.974445  | -0.297538 | 2.672201  |
| 6 | 3.462905  | -0.415478 | -0.623268 |
| 6 | 3.308013  | -1.573608 | 0.223423  |
| 1 | 4.013162  | -1.721414 | 1.036704  |
| 6 | 2.335958  | -2.561223 | -0.007385 |
| 1 | 2.307329  | -3.449166 | 0.617061  |
| 6 | 1.332331  | -2.360356 | -1.008035 |
| 6 | 1.380948  | -1.142051 | -1.724804 |
| 1 | 0.617113  | -0.934056 | -2.464285 |
| 6 | 2.461497  | -0.207215 | -1.569026 |
| 1 | 2.455410  | 0.688669  | -2.177884 |
| 6 | 4.653899  | 0.502581  | -0.404258 |
| 1 | 4.671820  | 0.745188  | 0.670378  |
| 6 | 5.967808  | -0.242379 | -0.729632 |
| 1 | 6.829815  | 0.393383  | -0.498793 |
| 1 | 6.012429  | -0.500435 | -1.794386 |
| 1 | 6.070591  | -1.169121 | -0.154842 |
| 6 | 4.583978  | 1.823638  | -1.180725 |
| 1 | 3.676588  | 2.388921  | -0.948785 |
| 1 | 4.616392  | 1.653354  | -2.263944 |
| 1 | 5.444925  | 2.449418  | -0.922919 |
| 6 | 0.318290  | -3.430238 | -1.318681 |
| 1 | -0.032343 | -3.931272 | -0.411158 |
| 1 | 0.766882  | -4.193831 | -1.967888 |
| 1 | -0.550999 | -3.019836 | -1.839459 |
| 5 | -2.858418 | 2.121405  | 0.143593  |

|    |           |           |          |
|----|-----------|-----------|----------|
| 6  | -0.200078 | 1.063408  | 0.293756 |
| 44 | 1.212481  | -0.626624 | 0.489564 |

**INT5**

**HF = -1219.0539562 hartree**

|   |           |           |           |
|---|-----------|-----------|-----------|
| 6 | -1.796522 | 1.088532  | -0.435967 |
| 5 | -0.525640 | 1.912704  | -1.206453 |
| 1 | -0.123149 | 1.490388  | -2.237360 |
| 5 | 0.452841  | 2.625880  | 0.065810  |
| 1 | 1.624680  | 2.711535  | -0.085087 |
| 5 | -0.236553 | 2.127838  | 1.603731  |
| 1 | 0.454347  | 1.870515  | 2.535348  |
| 5 | -1.635935 | 1.111142  | 1.254209  |
| 1 | -1.970115 | 0.169220  | 1.881591  |
| 5 | -2.155410 | 2.618977  | -1.113245 |
| 1 | -2.811724 | 2.620635  | -2.104639 |
| 5 | -0.737457 | 3.625740  | -0.792773 |
| 1 | -0.393766 | 4.469827  | -1.557930 |
| 5 | -0.565672 | 3.761772  | 0.977650  |
| 1 | -0.090817 | 4.719105  | 1.501142  |
| 5 | -1.871068 | 2.808346  | 1.731542  |
| 1 | -2.346988 | 3.068636  | 2.790298  |
| 1 | -3.990986 | 1.802118  | 0.515339  |
| 5 | -2.184395 | 3.753359  | 0.247184  |
| 1 | -2.901116 | 4.702964  | 0.232875  |
| 6 | -2.272125 | -0.184247 | -1.157550 |
| 1 | -2.312314 | 0.043490  | -2.227380 |
| 1 | -1.506144 | -0.947939 | -1.003350 |
| 6 | -3.609129 | -0.750593 | -0.723184 |
| 6 | -4.800059 | -0.352869 | -1.345396 |
| 1 | -4.776574 | 0.391113  | -2.136146 |
| 6 | -6.004012 | -0.915904 | -0.929211 |
| 1 | -6.940057 | -0.621195 | -1.395895 |
| 6 | -5.983671 | -1.862778 | 0.094649  |
| 1 | -6.895781 | -2.330677 | 0.452576  |
| 6 | -4.750332 | -2.200983 | 0.650698  |
| 1 | -4.688680 | -2.939309 | 1.448575  |
| 7 | -3.587303 | -1.668834 | 0.256311  |
| 6 | 0.567096  | -1.173369 | 2.494982  |
| 6 | -0.121494 | -1.827643 | 1.337211  |
| 1 | 1.286421  | -0.320520 | 2.112519  |
| 1 | -0.116829 | -0.546385 | 3.075508  |
| 1 | 0.107457  | -2.890883 | 1.217932  |
| 1 | -1.187497 | -1.642016 | 1.236625  |
| 6 | 1.428690  | -2.064936 | 3.391585  |
| 1 | 2.105983  | -2.688392 | 2.797212  |
| 1 | 2.031988  | -1.476989 | 4.092439  |
| 1 | 0.785634  | -2.732372 | 3.976121  |
| 6 | 3.530912  | -0.160858 | -0.535516 |
| 6 | 3.316704  | -1.450039 | 0.080913  |
| 1 | 3.933178  | -1.725485 | 0.932534  |
| 6 | 2.422515  | -2.406165 | -0.441141 |
| 1 | 2.359425  | -3.391632 | 0.009806  |
| 6 | 1.512412  | -2.039792 | -1.481041 |
| 6 | 1.588747  | -0.702187 | -1.951552 |
| 1 | 0.883436  | -0.369641 | -2.703591 |
| 6 | 2.639018  | 0.194745  | -1.545046 |
| 1 | 2.672376  | 1.182447  | -1.988907 |
| 6 | 4.703977  | 0.688955  | -0.068863 |



|    |           |           |           |
|----|-----------|-----------|-----------|
| 1  | 4.687559  | 0.678011  | 1.030517  |
| 6  | 6.027956  | 0.029874  | -0.517756 |
| 1  | 6.882462  | 0.593575  | -0.126856 |
| 1  | 6.102582  | 0.016817  | -1.611719 |
| 1  | 6.114691  | -1.002934 | -0.162556 |
| 6  | 4.653930  | 2.151756  | -0.525506 |
| 1  | 3.733519  | 2.647783  | -0.205575 |
| 1  | 4.728894  | 2.234763  | -1.616820 |
| 1  | 5.500495  | 2.700561  | -0.099222 |
| 6  | 0.545820  | -3.035053 | -2.066212 |
| 1  | 0.154252  | -3.711499 | -1.300759 |
| 1  | 1.047486  | -3.644544 | -2.829640 |
| 1  | -0.300226 | -2.532280 | -2.542790 |
| 5  | -2.852904 | 2.121149  | 0.432723  |
| 6  | -0.214594 | 1.049174  | 0.263692  |
| 44 | 1.193476  | -0.629664 | 0.244602  |

**VI**                    **HF = -1297.5807825 hartree**

|   |           |           |           |
|---|-----------|-----------|-----------|
| 6 | -1.933851 | 0.918115  | -0.658615 |
| 5 | -0.616729 | 1.414396  | -1.593559 |
| 1 | -0.188267 | 0.666300  | -2.406492 |
| 5 | 0.346599  | 2.525251  | -0.636369 |
| 1 | 1.514233  | 2.559521  | -0.830334 |
| 5 | -0.393256 | 2.591117  | 0.968006  |
| 1 | 0.226967  | 2.686027  | 1.972376  |
| 5 | -1.781125 | 1.498282  | 0.931095  |
| 1 | -2.138368 | 0.835735  | 1.841837  |
| 5 | -2.237211 | 2.129012  | -1.813354 |
| 1 | -2.855387 | 1.793630  | -2.772575 |
| 5 | -0.814530 | 3.170482  | -1.811909 |
| 1 | -0.435829 | 3.698461  | -2.809045 |
| 5 | -0.688007 | 3.908709  | -0.194454 |
| 1 | -0.218615 | 4.987680  | -0.016353 |
| 5 | -2.022258 | 3.264573  | 0.801898  |
| 1 | -2.522525 | 3.870432  | 1.694986  |
| 1 | -4.120592 | 1.918995  | -0.041850 |
| 5 | -2.284640 | 3.656749  | -0.920950 |
| 1 | -2.989485 | 4.546454  | -1.278109 |
| 6 | -2.437157 | -0.500506 | -0.969631 |
| 1 | -2.436550 | -0.607281 | -2.058821 |
| 1 | -1.713696 | -1.213379 | -0.571191 |
| 6 | -3.813727 | -0.860045 | -0.444689 |
| 6 | -4.959613 | -0.662335 | -1.226344 |
| 1 | -4.872474 | -0.225080 | -2.216465 |
| 6 | -6.202421 | -1.020957 | -0.709953 |
| 1 | -7.105144 | -0.873903 | -1.296674 |
| 6 | -6.265159 | -1.569220 | 0.571005  |
| 1 | -7.210652 | -1.863520 | 1.016275  |
| 6 | -5.071574 | -1.734928 | 1.272612  |
| 1 | -5.073700 | -2.162931 | 2.273653  |
| 7 | -3.872195 | -1.397755 | 0.783662  |
| 6 | 0.216012  | -0.729612 | 2.651850  |
| 6 | -0.592224 | -1.500043 | 1.814713  |
| 1 | -0.154093 | 0.225305  | 3.007573  |
| 1 | 0.979749  | -1.187997 | 3.276089  |
| 1 | -0.445138 | -2.575752 | 1.772167  |
| 1 | -1.593355 | -1.177196 | 1.556121  |
| 6 | 2.225004  | 0.749552  | 1.903243  |

|    |           |           |           |
|----|-----------|-----------|-----------|
| 1  | 1.626886  | 1.184683  | 2.703236  |
| 1  | 2.882752  | 0.002051  | 2.368431  |
| 6  | 3.164844  | -1.008757 | -0.825203 |
| 6  | 2.983865  | -1.871053 | 0.303511  |
| 1  | 3.750789  | -1.909875 | 1.071073  |
| 6  | 1.890037  | -2.746943 | 0.381578  |
| 1  | 1.827214  | -3.450754 | 1.206860  |
| 6  | 0.900674  | -2.781097 | -0.649067 |
| 6  | 0.971806  | -1.784515 | -1.625858 |
| 1  | 0.195775  | -1.714060 | -2.380431 |
| 6  | 2.094746  | -0.909455 | -1.716496 |
| 1  | 2.128170  | -0.200308 | -2.534480 |
| 6  | 4.509638  | -0.334521 | -1.049597 |
| 1  | 4.836656  | 0.080263  | -0.087965 |
| 6  | 5.543833  | -1.411011 | -1.456754 |
| 1  | 6.532813  | -0.954059 | -1.573255 |
| 1  | 5.269678  | -1.873757 | -2.412171 |
| 1  | 5.625509  | -2.205787 | -0.707512 |
| 6  | 4.490213  | 0.797332  | -2.086243 |
| 1  | 3.743878  | 1.562667  | -1.851594 |
| 1  | 4.282623  | 0.413778  | -3.092426 |
| 1  | 5.470917  | 1.283173  | -2.119942 |
| 6  | -0.150880 | -3.858898 | -0.692033 |
| 1  | 0.265571  | -4.764037 | -1.153613 |
| 1  | -1.016956 | -3.552596 | -1.285589 |
| 1  | -0.500566 | -4.136772 | 0.306586  |
| 5  | -2.977813 | 2.182808  | -0.211241 |
| 6  | -0.296968 | 1.125911  | 0.107316  |
| 44 | 0.996597  | -0.535729 | 0.604791  |
| 6  | 3.075884  | 1.877477  | 1.310979  |
| 1  | 3.484094  | 1.626800  | 0.328616  |
| 1  | 2.458131  | 2.764851  | 1.158299  |
| 6  | 4.237356  | 2.244372  | 2.253020  |
| 1  | 4.928171  | 1.401341  | 2.388689  |
| 1  | 4.813261  | 3.091583  | 1.859999  |
| 1  | 3.865452  | 2.525636  | 3.245736  |

**3TS2**

HF = -1297.5520429 hartree

$v^* = -329.7913 \text{ icm}^{-1}$

|   |           |          |           |
|---|-----------|----------|-----------|
| 6 | -1.946126 | 0.927006 | -0.689411 |
| 5 | -0.627245 | 1.465446 | -1.610332 |
| 1 | -0.214242 | 0.769044 | -2.473548 |
| 5 | 0.348977  | 2.489877 | -0.568122 |
| 1 | 1.525702  | 2.506788 | -0.719285 |
| 5 | -0.404482 | 2.465544 | 1.024777  |
| 1 | 0.211071  | 2.481841 | 2.036103  |
| 5 | -1.812768 | 1.417352 | 0.925524  |
| 1 | -2.188322 | 0.706161 | 1.789676  |
| 5 | -2.234117 | 2.209702 | -1.780345 |
| 1 | -2.859076 | 1.944738 | -2.756944 |
| 5 | -0.792919 | 3.230595 | -1.711155 |
| 1 | -0.403094 | 3.812698 | -2.673162 |
| 5 | -0.662193 | 3.861911 | -0.048921 |
| 1 | -0.173313 | 4.918526 | 0.198343  |
| 5 | -2.015688 | 3.188212 | 0.898050  |
| 1 | -2.506552 | 3.747037 | 1.826448  |
| 1 | -4.132166 | 1.930713 | -0.042537 |
| 5 | -2.260216 | 3.684154 | -0.799296 |
| 1 | -2.946562 | 4.606809 | -1.105052 |

|    |           |           |           |
|----|-----------|-----------|-----------|
| 6  | -2.461112 | -0.479393 | -1.031693 |
| 1  | -2.473246 | -0.568432 | -2.122824 |
| 1  | -1.734916 | -1.194229 | -0.642427 |
| 6  | -3.826060 | -0.853880 | -0.488772 |
| 6  | -4.992952 | -0.609869 | -1.224914 |
| 1  | -4.931564 | -0.122111 | -2.193247 |
| 6  | -6.222456 | -0.989268 | -0.691897 |
| 1  | -7.141047 | -0.807700 | -1.243292 |
| 6  | -6.250718 | -1.603681 | 0.559958  |
| 1  | -7.184553 | -1.916882 | 1.016909  |
| 6  | -5.037873 | -1.812354 | 1.215878  |
| 1  | -5.013926 | -2.293711 | 2.192168  |
| 7  | -3.850483 | -1.456408 | 0.710955  |
| 6  | 0.337461  | -0.519246 | 2.759624  |
| 6  | -0.362517 | -1.401485 | 1.850584  |
| 1  | -0.180288 | 0.394203  | 3.034292  |
| 1  | 0.824049  | -1.008152 | 3.600322  |
| 1  | -0.201936 | -2.468325 | 2.019204  |
| 1  | -1.399537 | -1.174482 | 1.620285  |
| 6  | 2.164023  | 0.338006  | 2.469391  |
| 1  | 1.919470  | 0.745621  | 3.451463  |
| 1  | 2.819274  | -0.520963 | 2.631764  |
| 6  | 3.197790  | -0.863854 | -0.974954 |
| 6  | 3.057082  | -1.771224 | 0.137326  |
| 1  | 3.852022  | -1.806352 | 0.878329  |
| 6  | 2.012668  | -2.708596 | 0.226702  |
| 1  | 2.012733  | -3.452160 | 1.017901  |
| 6  | 0.912945  | -2.631084 | -0.683032 |
| 6  | 0.934002  | -1.573846 | -1.625601 |
| 1  | 0.098083  | -1.454345 | -2.303818 |
| 6  | 2.092640  | -0.745612 | -1.807542 |
| 1  | 2.075082  | -0.007832 | -2.601201 |
| 6  | 4.515453  | -0.138506 | -1.191441 |
| 1  | 4.886324  | 0.165808  | -0.202221 |
| 6  | 5.554163  | -1.121008 | -1.779331 |
| 1  | 6.531320  | -0.632729 | -1.869142 |
| 1  | 5.249005  | -1.456851 | -2.777440 |
| 1  | 5.676043  | -2.008412 | -1.148239 |
| 6  | 4.406335  | 1.119922  | -2.063448 |
| 1  | 3.661344  | 1.822229  | -1.675934 |
| 1  | 4.134025  | 0.870186  | -3.095919 |
| 1  | 5.373154  | 1.633187  | -2.098820 |
| 6  | -0.173260 | -3.674789 | -0.684072 |
| 1  | 0.165744  | -4.558085 | -1.241308 |
| 1  | -1.084313 | -3.308689 | -1.164329 |
| 1  | -0.428194 | -3.999473 | 0.328716  |
| 5  | -2.983873 | 2.186065  | -0.182503 |
| 6  | -0.347827 | 1.050777  | 0.057804  |
| 44 | 1.007109  | -0.656593 | 0.457391  |
| 6  | 2.897364  | 1.470777  | 1.737168  |
| 1  | 3.248210  | 1.161717  | 0.752843  |
| 1  | 2.227878  | 2.315319  | 1.575275  |
| 6  | 4.097532  | 1.943070  | 2.580619  |
| 1  | 4.816965  | 1.132425  | 2.754672  |
| 1  | 4.626569  | 2.757991  | 2.071926  |
| 1  | 3.774648  | 2.316332  | 3.560088  |

INT6

HF = -1297.6134668 hartree

|   |           |           |           |
|---|-----------|-----------|-----------|
| 6 | -1.978595 | 1.211551  | -0.259227 |
| 5 | -0.710807 | 2.184172  | -0.844756 |
| 1 | -0.339933 | 2.005185  | -1.956461 |
| 5 | 0.311781  | 2.545063  | 0.539506  |
| 1 | 1.486673  | 2.633731  | 0.388701  |
| 5 | -0.360131 | 1.693555  | 1.926856  |
| 1 | 0.342122  | 1.198436  | 2.744962  |
| 5 | -1.791370 | 0.816625  | 1.381809  |
| 1 | -2.126686 | -0.251153 | 1.753142  |
| 5 | -2.319931 | 2.869297  | -0.537279 |
| 1 | -3.000527 | 3.121587  | -1.478879 |
| 5 | -0.873962 | 3.745461  | -0.017283 |
| 1 | -0.528191 | 4.746391  | -0.559907 |
| 5 | -0.659648 | 3.437827  | 1.729869  |
| 1 | -0.153452 | 4.230187  | 2.458978  |
| 5 | -1.974533 | 2.352514  | 2.262508  |
| 1 | -2.422859 | 2.358796  | 3.364039  |
| 1 | -4.139251 | 1.714454  | 0.889845  |
| 5 | -2.293296 | 3.636493  | 1.060727  |
| 1 | -2.987960 | 4.572797  | 1.298005  |
| 6 | -2.496346 | 0.154195  | -1.251071 |
| 1 | -2.603720 | 0.644750  | -2.224021 |
| 1 | -1.723997 | -0.612045 | -1.341124 |
| 6 | -3.796526 | -0.541134 | -0.899453 |
| 6 | -5.035396 | 0.015742  | -1.243727 |
| 1 | -5.077430 | 0.976281  | -1.748579 |
| 6 | -6.201359 | -0.674449 | -0.922113 |
| 1 | -7.173570 | -0.261245 | -1.176764 |
| 6 | -6.096024 | -1.902847 | -0.269707 |
| 1 | -6.976244 | -2.478080 | 0.001031  |
| 6 | -4.820030 | -2.382058 | 0.025097  |
| 1 | -4.692126 | -3.339304 | 0.527728  |
| 7 | -3.692653 | -1.728847 | -0.282166 |
| 6 | 0.115190  | -2.007333 | 2.466782  |
| 6 | -0.077257 | -2.002847 | 0.938597  |
| 1 | -0.275291 | -1.084885 | 2.910835  |
| 1 | -0.526431 | -2.814883 | 2.855373  |
| 1 | 0.228876  | -2.982817 | 0.549790  |
| 1 | -1.137858 | -1.878527 | 0.706538  |
| 6 | 1.550164  | -2.241544 | 2.969829  |
| 1 | 1.516144  | -2.622603 | 4.000195  |
| 1 | 2.026931  | -3.032584 | 2.370240  |
| 6 | 3.186368  | 0.204748  | -1.297192 |
| 6 | 3.209301  | -1.092422 | -0.646945 |
| 1 | 3.994080  | -1.290276 | 0.077814  |
| 6 | 2.369098  | -2.155512 | -1.034204 |
| 1 | 2.510399  | -3.145766 | -0.614359 |
| 6 | 1.226483  | -1.873976 | -1.839827 |
| 6 | 1.048957  | -0.511255 | -2.248867 |
| 1 | 0.171117  | -0.253048 | -2.831321 |
| 6 | 2.095414  | 0.470374  | -2.107671 |
| 1 | 1.958711  | 1.446524  | -2.556245 |
| 6 | 4.327529  | 1.175627  | -1.036688 |
| 1 | 4.472719  | 1.209214  | 0.053157  |
| 6 | 5.631095  | 0.627341  | -1.659992 |
| 1 | 6.473521  | 1.282271  | -1.411541 |
| 1 | 5.548185  | 0.581316  | -2.752424 |
| 1 | 5.869136  | -0.378782 | -1.297990 |

|    |           |           |           |
|----|-----------|-----------|-----------|
| 6  | 4.060453  | 2.606016  | -1.521131 |
| 1  | 3.149450  | 3.021557  | -1.080708 |
| 1  | 3.967495  | 2.647338  | -2.613446 |
| 1  | 4.897122  | 3.254523  | -1.240677 |
| 6  | 0.274829  | -2.951583 | -2.283712 |
| 1  | 0.597664  | -3.351024 | -3.254350 |
| 1  | -0.741478 | -2.564277 | -2.400496 |
| 1  | 0.240752  | -3.782035 | -1.573688 |
| 5  | -2.995081 | 2.019289  | 0.859604  |
| 6  | -0.398974 | 0.986377  | 0.367436  |
| 44 | 1.070221  | -0.558676 | -0.075919 |
| 6  | 2.422279  | -0.981891 | 2.957621  |
| 1  | 2.357917  | -0.491707 | 1.964123  |
| 1  | 2.009726  | -0.248645 | 3.661627  |
| 6  | 3.895286  | -1.242204 | 3.283752  |
| 1  | 4.348673  | -1.937615 | 2.565066  |
| 1  | 4.481518  | -0.315981 | 3.274980  |
| 1  | 4.000185  | -1.691321 | 4.279067  |

**3V-1**

**HF = -1140.4678297 hartree**

|   |           |           |           |
|---|-----------|-----------|-----------|
| 7 | 3.960434  | -1.245820 | -1.047366 |
| 6 | 1.730591  | 0.637309  | 0.393799  |
| 6 | 2.356094  | -0.735935 | 0.711798  |
| 1 | 2.301549  | -0.869426 | 1.796081  |
| 1 | 1.714778  | -1.489717 | 0.252254  |
| 6 | 3.783381  | -0.956156 | 0.253284  |
| 6 | 4.855707  | -0.874635 | 1.151669  |
| 1 | 4.674332  | -0.639353 | 2.196136  |
| 6 | 6.150435  | -1.100275 | 0.684770  |
| 1 | 6.997248  | -1.044839 | 1.363453  |
| 6 | 6.334833  | -1.399255 | -0.663931 |
| 1 | 7.323084  | -1.584653 | -1.073564 |
| 6 | 5.206270  | -1.458011 | -1.484258 |
| 1 | 5.304865  | -1.689992 | -2.543427 |
| 6 | -3.771486 | -0.286442 | 0.037314  |
| 6 | -3.692198 | -1.621770 | -0.510890 |
| 1 | -4.299569 | -1.864187 | -1.378574 |
| 6 | -2.826101 | -2.577658 | 0.011196  |
| 1 | -2.758332 | -3.559937 | -0.446986 |
| 6 | -1.894590 | -2.212645 | 1.043503  |
| 6 | -2.032712 | -0.909362 | 1.635996  |
| 1 | -1.383509 | -0.636520 | 2.460471  |
| 6 | -3.022326 | 0.013343  | 1.188953  |
| 1 | -3.077130 | 0.992708  | 1.646721  |
| 6 | -4.769022 | 0.682683  | -0.582615 |
| 1 | -4.793985 | 0.458160  | -1.658388 |
| 6 | -6.180744 | 0.407164  | -0.020548 |
| 1 | -6.921070 | 1.043678  | -0.518793 |
| 1 | -6.218458 | 0.621165  | 1.054281  |
| 1 | -6.478814 | -0.637313 | -0.165954 |
| 6 | -4.393932 | 2.162505  | -0.427524 |
| 1 | -3.384022 | 2.362319  | -0.798004 |
| 1 | -4.440564 | 2.487240  | 0.618433  |
| 1 | -5.098007 | 2.784556  | -0.991351 |
| 6 | -0.932054 | -3.222589 | 1.611914  |
| 1 | -1.431365 | -3.844747 | 2.367749  |
| 1 | -0.083726 | -2.727360 | 2.092992  |
| 1 | -0.544515 | -3.885202 | 0.832378  |

|    |           |           |           |
|----|-----------|-----------|-----------|
| 5  | 0.681652  | 1.349876  | 1.521545  |
| 1  | 0.458417  | 0.746188  | 2.521564  |
| 5  | -0.366806 | 2.422966  | 0.598449  |
| 1  | -1.475361 | 2.666610  | 0.954169  |
| 5  | 0.069402  | 2.242832  | -1.118860 |
| 1  | -0.702151 | 2.357850  | -2.019914 |
| 5  | 1.393586  | 1.081738  | -1.216793 |
| 1  | 1.726963  | 0.361250  | -2.087775 |
| 1  | 3.656433  | 1.513675  | -0.593271 |
| 5  | 2.345217  | 1.946384  | 1.353625  |
| 1  | 3.221472  | 1.685872  | 2.106984  |
| 5  | 1.030935  | 3.104438  | 1.473098  |
| 1  | 0.921793  | 3.781293  | 2.444572  |
| 5  | 0.644351  | 3.663642  | -0.180267 |
| 1  | 0.254490  | 4.764241  | -0.405010 |
| 5  | 1.738857  | 2.830485  | -1.303817 |
| 1  | 2.239913  | 3.244577  | -2.295803 |
| 5  | 2.329379  | 3.364833  | 0.290690  |
| 1  | 3.231677  | 4.130968  | 0.371268  |
| 6  | -0.162951 | -1.751391 | -1.687118 |
| 1  | -0.407499 | -2.820771 | -1.735930 |
| 1  | -0.481801 | -1.285055 | -2.644511 |
| 1  | 0.922014  | -1.643355 | -1.639344 |
| 5  | 0.036040  | 0.777506  | -0.065827 |
| 6  | 2.656001  | 1.818056  | -0.314740 |
| 44 | -1.467646 | -0.697098 | -0.447863 |

V-1

HF = -1219.0304166 hartree

|   |           |           |           |
|---|-----------|-----------|-----------|
| 6 | -1.699214 | 0.825083  | -0.443561 |
| 5 | -0.506315 | 1.672542  | -1.281346 |
| 1 | -0.038797 | 1.173116  | -2.252380 |
| 5 | 0.248237  | 2.752596  | -0.107815 |
| 1 | 1.378606  | 3.106209  | -0.219694 |
| 5 | -0.527283 | 2.450821  | 1.463210  |
| 1 | -0.008841 | 2.602583  | 2.518866  |
| 5 | -1.716406 | 1.184308  | 1.218356  |
| 1 | -2.185996 | 0.405036  | 1.970435  |
| 5 | -2.208875 | 2.152165  | -1.449635 |
| 1 | -2.880483 | 1.872626  | -2.385591 |
| 5 | -0.988741 | 3.392310  | -1.231660 |
| 1 | -0.727085 | 4.130788  | -2.126456 |
| 5 | -1.005118 | 3.874136  | 0.487292  |
| 1 | -0.761053 | 4.982800  | 0.841083  |
| 5 | -2.236343 | 2.895734  | 1.308078  |
| 1 | -2.965025 | 3.206460  | 2.191092  |
| 1 | -3.845106 | 1.496349  | 0.153469  |
| 5 | -2.523323 | 3.494437  | -0.343662 |
| 1 | -3.452157 | 4.195944  | -0.574188 |
| 6 | -2.154977 | -0.559900 | -0.945218 |
| 1 | -2.040035 | -0.569372 | -2.033272 |
| 1 | -1.454961 | -1.284524 | -0.525934 |
| 6 | -3.565075 | -0.986625 | -0.588945 |
| 6 | -4.636758 | -0.763437 | -1.465193 |
| 1 | -4.466838 | -0.269929 | -2.417539 |
| 6 | -5.914242 | -1.183451 | -1.095794 |
| 1 | -6.759584 | -1.022508 | -1.759315 |
| 6 | -6.082832 | -1.815942 | 0.135001  |
| 1 | -7.057179 | -2.162839 | 0.465245  |

|    |           |           |           |
|----|-----------|-----------|-----------|
| 6  | -4.956640 | -1.999090 | 0.939198  |
| 1  | -5.042786 | -2.492451 | 1.905801  |
| 7  | -3.726940 | -1.601347 | 0.595090  |
| 6  | 0.808732  | -1.298331 | 2.608046  |
| 6  | -0.164263 | -1.741376 | 1.695334  |
| 1  | 0.565371  | -0.495619 | 3.296393  |
| 1  | 1.591543  | -1.968292 | 2.961989  |
| 1  | -0.118470 | -2.761623 | 1.316114  |
| 1  | -1.164955 | -1.331179 | 1.715076  |
| 6  | 2.243837  | 0.884771  | 1.951862  |
| 1  | 2.622528  | 1.726161  | 1.363630  |
| 1  | 1.581528  | 1.281832  | 2.717580  |
| 1  | 3.081622  | 0.377792  | 2.447605  |
| 6  | -2.836854 | 1.887273  | 0.103310  |
| 5  | -0.100728 | 1.039650  | 0.392289  |
| 6  | 3.513473  | -0.359008 | -0.563237 |
| 6  | 3.499845  | -1.564272 | 0.200647  |
| 1  | 4.263209  | -1.728209 | 0.955092  |
| 6  | 2.528517  | -2.556858 | -0.028556 |
| 1  | 2.553857  | -3.472390 | 0.556859  |
| 6  | 1.532732  | -2.401298 | -1.034284 |
| 6  | 1.466120  | -1.159321 | -1.688562 |
| 1  | 0.696166  | -0.982118 | -2.430972 |
| 6  | 2.448123  | -0.145613 | -1.457569 |
| 1  | 2.374464  | 0.781582  | -2.010778 |
| 6  | 4.665691  | 0.619898  | -0.384646 |
| 1  | 4.780772  | 0.780271  | 0.695854  |
| 6  | 5.972162  | -0.020661 | -0.905012 |
| 1  | 6.818243  | 0.652248  | -0.725919 |
| 1  | 5.912189  | -0.207956 | -1.983921 |
| 1  | 6.189160  | -0.973232 | -0.410028 |
| 6  | 4.445082  | 1.988363  | -1.041666 |
| 1  | 3.524238  | 2.466389  | -0.695412 |
| 1  | 4.400141  | 1.906660  | -2.134855 |
| 1  | 5.281798  | 2.651973  | -0.798454 |
| 6  | 0.593883  | -3.530247 | -1.373918 |
| 1  | 0.265105  | -4.067783 | -0.478044 |
| 1  | 1.095233  | -4.258752 | -2.024439 |
| 1  | -0.293816 | -3.169252 | -1.901328 |
| 44 | 1.362645  | -0.559832 | 0.628903  |

**3TS1-1**      **HF = -1218.9949925 hartree**       $\nu^* = -460.4794 \text{ icm}^{-1}$

|   |           |          |           |
|---|-----------|----------|-----------|
| 6 | -1.720049 | 0.824717 | -0.478708 |
| 5 | -0.541674 | 1.684180 | -1.328666 |
| 1 | -0.127574 | 1.217243 | -2.339443 |
| 5 | 0.288944  | 2.682853 | -0.132848 |
| 1 | 1.425599  | 3.009635 | -0.265637 |
| 5 | -0.425153 | 2.316936 | 1.450127  |
| 1 | 0.160436  | 2.385061 | 2.482170  |
| 5 | -1.666111 | 1.100152 | 1.194498  |
| 1 | -2.117766 | 0.283136 | 1.917609  |
| 5 | -2.235718 | 2.210524 | -1.394732 |
| 1 | -2.956292 | 2.002357 | -2.312560 |
| 5 | -0.975787 | 3.410696 | -1.167409 |
| 1 | -0.735137 | 4.189661 | -2.033154 |
| 5 | -0.905940 | 3.803524 | 0.573254  |
| 1 | -0.616120 | 4.886218 | 0.970687  |
| 5 | -2.126841 | 2.816950 | 1.398771  |

|    |           |           |           |
|----|-----------|-----------|-----------|
| 1  | -2.808428 | 3.100770  | 2.327503  |
| 1  | -3.824411 | 1.520065  | 0.243120  |
| 5  | -2.468390 | 3.503974  | -0.208612 |
| 1  | -3.385080 | 4.240942  | -0.364590 |
| 6  | -2.214037 | -0.536160 | -1.004082 |
| 1  | -2.120165 | -0.523708 | -2.094328 |
| 1  | -1.516380 | -1.278345 | -0.611481 |
| 6  | -3.622908 | -0.946607 | -0.626542 |
| 6  | -4.715627 | -0.643321 | -1.451494 |
| 1  | -4.562324 | -0.098690 | -2.378464 |
| 6  | -5.991778 | -1.051336 | -1.065101 |
| 1  | -6.853060 | -0.829169 | -1.689303 |
| 6  | -6.138267 | -1.752671 | 0.130803  |
| 1  | -7.110728 | -2.094205 | 0.472076  |
| 6  | -4.992378 | -2.013478 | 0.884034  |
| 1  | -5.061340 | -2.563011 | 1.821282  |
| 7  | -3.763468 | -1.627253 | 0.523736  |
| 6  | 0.665366  | -0.853442 | 2.765288  |
| 6  | 0.027829  | -1.682608 | 1.764827  |
| 1  | 0.032643  | -0.086892 | 3.202162  |
| 1  | 1.280949  | -1.361325 | 3.506353  |
| 1  | 0.300944  | -2.740321 | 1.771776  |
| 1  | -1.037053 | -1.534683 | 1.603129  |
| 6  | 2.197153  | 0.401889  | 2.455486  |
| 1  | 2.395280  | 1.208386  | 1.746931  |
| 1  | 1.870354  | 0.886504  | 3.373492  |
| 1  | 3.096596  | -0.181439 | 2.652228  |
| 6  | -2.808320 | 1.886713  | 0.171237  |
| 5  | -0.099511 | 0.958050  | 0.285127  |
| 6  | 3.543159  | -0.319190 | -0.631268 |
| 6  | 3.543503  | -1.556492 | 0.107499  |
| 1  | 4.317242  | -1.716990 | 0.853948  |
| 6  | 2.602190  | -2.563581 | -0.115418 |
| 1  | 2.654277  | -3.490887 | 0.447882  |
| 6  | 1.501660  | -2.334851 | -1.005262 |
| 6  | 1.462750  | -1.097806 | -1.700520 |
| 1  | 0.666368  | -0.911420 | -2.411648 |
| 6  | 2.492234  | -0.114353 | -1.533406 |
| 1  | 2.417714  | 0.810846  | -2.091541 |
| 6  | 4.674911  | 0.670778  | -0.397397 |
| 1  | 4.741245  | 0.823741  | 0.691538  |
| 6  | 6.020109  | 0.068347  | -0.859692 |
| 1  | 6.844748  | 0.749890  | -0.621016 |
| 1  | 6.018135  | -0.094340 | -1.944277 |
| 1  | 6.229152  | -0.892836 | -0.377822 |
| 6  | 4.457914  | 2.043778  | -1.045829 |
| 1  | 3.517266  | 2.502505  | -0.727747 |
| 1  | 4.451051  | 1.972236  | -2.140545 |
| 1  | 5.274897  | 2.718576  | -0.768053 |
| 6  | 0.510578  | -3.434315 | -1.293203 |
| 1  | 0.231871  | -3.973649 | -0.382214 |
| 1  | 0.942742  | -4.163523 | -1.991662 |
| 1  | -0.402690 | -3.040138 | -1.747680 |
| 44 | 1.352597  | -0.635380 | 0.494729  |

INT5-1

HF = -1219.0474968 hartree

|   |           |          |           |
|---|-----------|----------|-----------|
| 6 | -1.850770 | 0.617113 | 0.062743  |
| 5 | -1.047879 | 1.148938 | -1.327199 |

S80



|   |           |           |           |
|---|-----------|-----------|-----------|
| 1 | -0.920251 | 0.385579  | -2.228687 |
| 5 | 0.034579  | 2.438354  | -0.798840 |
| 1 | 1.047250  | 2.675759  | -1.374084 |
| 5 | -0.128610 | 2.587096  | 0.963322  |
| 1 | 0.752852  | 2.928629  | 1.687211  |
| 5 | -1.307557 | 1.396091  | 1.479953  |
| 1 | -1.454093 | 0.831080  | 2.509785  |
| 5 | -2.711946 | 1.675555  | -1.014023 |
| 1 | -3.662369 | 1.239345  | -1.563919 |
| 5 | -1.530888 | 2.854267  | -1.549859 |
| 1 | -1.623746 | 3.332597  | -2.634656 |
| 5 | -0.960642 | 3.751567  | -0.115859 |
| 1 | -0.640689 | 4.895764  | -0.169941 |
| 5 | -1.798058 | 3.098803  | 1.302469  |
| 1 | -2.183223 | 3.668382  | 2.269385  |
| 1 | -3.673727 | 1.521952  | 1.162310  |
| 5 | -2.662680 | 3.267477  | -0.241270 |
| 1 | -3.631137 | 3.948672  | -0.316602 |
| 6 | -2.376361 | -0.823146 | 0.211939  |
| 1 | -1.725429 | -1.452250 | -0.398391 |
| 1 | -2.231671 | -1.131266 | 1.250075  |
| 6 | -3.825021 | -1.075121 | -0.153939 |
| 6 | -4.169771 | -1.823403 | -1.285696 |
| 1 | -3.393911 | -2.207030 | -1.941669 |
| 6 | -5.516062 | -2.061147 | -1.558353 |
| 1 | -5.807042 | -2.639754 | -2.430903 |
| 6 | -6.477872 | -1.542604 | -0.693143 |
| 1 | -7.538280 | -1.701515 | -0.862955 |
| 6 | -6.041001 | -0.806846 | 0.409282  |
| 1 | -6.759138 | -0.384014 | 1.109817  |
| 7 | -4.752060 | -0.578773 | 0.684323  |
| 6 | 1.489424  | -0.019368 | 2.806951  |
| 6 | 0.657366  | -1.145472 | 2.276181  |
| 1 | 1.958392  | 0.608612  | 1.913626  |
| 1 | 0.878688  | 0.780126  | 3.239350  |
| 1 | 1.015276  | -2.141154 | 2.557038  |
| 1 | -0.413056 | -1.055962 | 2.447970  |
| 6 | 2.666104  | -0.383167 | 3.715499  |
| 1 | 3.258154  | -1.196971 | 3.282960  |
| 1 | 3.331542  | 0.471550  | 3.884152  |
| 1 | 2.293493  | -0.718924 | 4.690268  |
| 6 | -2.757610 | 1.847904  | 0.683253  |
| 5 | -0.100879 | 0.932670  | 0.213078  |
| 6 | 3.476894  | -0.252885 | -0.940898 |
| 6 | 3.680608  | -1.340001 | -0.017932 |
| 1 | 4.559600  | -1.319694 | 0.621296  |
| 6 | 2.795460  | -2.419967 | 0.075258  |
| 1 | 2.990442  | -3.221419 | 0.782017  |
| 6 | 1.575875  | -2.420977 | -0.676881 |
| 6 | 1.355049  | -1.336161 | -1.569043 |
| 1 | 0.454685  | -1.319450 | -2.171534 |
| 6 | 2.318204  | -0.286312 | -1.732200 |
| 1 | 2.099125  | 0.517906  | -2.423649 |
| 6 | 4.573960  | 0.795318  | -1.073914 |
| 1 | 4.943739  | 0.994310  | -0.057967 |
| 6 | 5.750913  | 0.211317  | -1.886714 |
| 1 | 6.580871  | 0.926400  | -1.924820 |
| 1 | 5.441447  | -0.003131 | -2.916805 |

|    |           |           |           |
|----|-----------|-----------|-----------|
| 1  | 6.126690  | -0.720211 | -1.448747 |
| 6  | 4.115270  | 2.130154  | -1.672599 |
| 1  | 3.275850  | 2.556018  | -1.116504 |
| 1  | 3.807620  | 2.018714  | -2.719368 |
| 1  | 4.942075  | 2.848840  | -1.653154 |
| 6  | 0.631098  | -3.593004 | -0.603998 |
| 1  | 0.533112  | -3.962863 | 0.421536  |
| 1  | 0.998172  | -4.421599 | -1.224937 |
| 1  | -0.365804 | -3.324318 | -0.965191 |
| 44 | 1.514572  | -0.490107 | 0.479813  |

VI-1

HF = -1297.5847347 hartree

|   |           |           |           |
|---|-----------|-----------|-----------|
| 6 | -1.880979 | 0.698719  | -0.627803 |
| 5 | -0.679110 | 1.263524  | -1.660740 |
| 1 | -0.318851 | 0.552853  | -2.541042 |
| 5 | 0.229589  | 2.473541  | -0.761680 |
| 1 | 1.368802  | 2.703060  | -1.010024 |
| 5 | -0.465305 | 2.547766  | 0.874119  |
| 1 | 0.127341  | 2.849649  | 1.854601  |
| 5 | -1.762187 | 1.365339  | 0.934077  |
| 1 | -2.244959 | 0.791103  | 1.845419  |
| 5 | -2.344365 | 1.857232  | -1.842613 |
| 1 | -3.091573 | 1.468006  | -2.676207 |
| 5 | -1.020642 | 2.998737  | -1.926151 |
| 1 | -0.756050 | 3.527092  | -2.958172 |
| 5 | -0.891483 | 3.796663  | -0.335565 |
| 1 | -0.536825 | 4.924983  | -0.213454 |
| 5 | -2.140335 | 3.103575  | 0.716262  |
| 1 | -2.784185 | 3.638397  | 1.556825  |
| 1 | -3.923174 | 1.661142  | -0.066526 |
| 5 | -2.483406 | 3.404732  | -1.003594 |
| 1 | -3.366460 | 4.130298  | -1.322474 |
| 6 | -2.488880 | -0.699079 | -0.863928 |
| 1 | -2.444809 | -0.895356 | -1.939156 |
| 1 | -1.832217 | -1.413602 | -0.368875 |
| 6 | -3.908127 | -0.916543 | -0.377552 |
| 6 | -5.000110 | -0.789424 | -1.247729 |
| 1 | -4.838608 | -0.528221 | -2.289483 |
| 6 | -6.287928 | -1.001901 | -0.756375 |
| 1 | -7.149184 | -0.909088 | -1.412417 |
| 6 | -6.446476 | -1.337996 | 0.587028  |
| 1 | -7.428396 | -1.514945 | 1.015137  |
| 6 | -5.300140 | -1.447449 | 1.376431  |
| 1 | -5.378169 | -1.712973 | 2.429347  |
| 7 | -4.060708 | -1.246037 | 0.916386  |
| 6 | 0.598248  | -1.568858 | 2.513431  |
| 6 | -0.511725 | -1.639456 | 1.653847  |
| 1 | 0.602550  | -0.847533 | 3.322784  |
| 1 | 1.218197  | -2.444975 | 2.699541  |
| 1 | -0.757660 | -2.582451 | 1.168181  |
| 1 | -1.371591 | -1.010060 | 1.835094  |
| 6 | 1.952977  | 0.704267  | 2.060971  |
| 1 | 1.115929  | 1.093111  | 2.646584  |
| 1 | 2.538949  | 0.063100  | 2.735385  |
| 6 | -2.892925 | 1.943690  | -0.241270 |
| 5 | -0.208738 | 0.925409  | 0.091172  |
| 6 | 3.331912  | -0.718194 | -0.821202 |
| 6 | 3.334898  | -1.752069 | 0.164816  |

|    |           |           |           |
|----|-----------|-----------|-----------|
| 1  | 4.150172  | -1.804628 | 0.880583  |
| 6  | 2.365666  | -2.772179 | 0.143510  |
| 1  | 2.435443  | -3.587813 | 0.858582  |
| 6  | 1.300520  | -2.762793 | -0.792851 |
| 6  | 1.185835  | -1.632024 | -1.625302 |
| 1  | 0.364343  | -1.562543 | -2.328980 |
| 6  | 2.209088  | -0.637654 | -1.656098 |
| 1  | 2.120094  | 0.173218  | -2.368760 |
| 6  | 4.574773  | 0.139111  | -1.010481 |
| 1  | 4.961933  | 0.380330  | -0.012745 |
| 6  | 5.654410  | -0.708238 | -1.724374 |
| 1  | 6.582367  | -0.132890 | -1.819788 |
| 1  | 5.325243  | -0.989439 | -2.731957 |
| 1  | 5.880696  | -1.628274 | -1.174553 |
| 6  | 4.341916  | 1.452275  | -1.768071 |
| 1  | 3.552452  | 2.053127  | -1.309683 |
| 1  | 4.070509  | 1.268624  | -2.814692 |
| 1  | 5.263348  | 2.044575  | -1.772632 |
| 6  | 0.342858  | -3.921752 | -0.896060 |
| 1  | 0.165051  | -4.388984 | 0.078280  |
| 1  | 0.751652  | -4.695088 | -1.559349 |
| 1  | -0.621660 | -3.609763 | -1.308255 |
| 44 | 1.174194  | -0.708823 | 0.590792  |
| 6  | 2.851035  | 1.872485  | 1.647387  |
| 1  | 3.761629  | 1.503985  | 1.160399  |
| 1  | 2.354336  | 2.524899  | 0.925580  |
| 6  | 3.271683  | 2.717217  | 2.864110  |
| 1  | 3.798376  | 2.106873  | 3.609430  |
| 1  | 3.938444  | 3.538543  | 2.570647  |
| 1  | 2.395666  | 3.156620  | 3.356221  |

**3TS2-1**

**HF = -1297.547506 hartree**

$\nu^{\ddagger} = -343.6371 \text{ } icm^{-1}$

|   |           |           |           |
|---|-----------|-----------|-----------|
| 6 | -1.895707 | 0.743649  | -0.615348 |
| 5 | -0.701961 | 1.404281  | -1.611083 |
| 1 | -0.334559 | 0.766923  | -2.543217 |
| 5 | 0.197988  | 2.543390  | -0.609418 |
| 1 | 1.341613  | 2.794675  | -0.821276 |
| 5 | -0.499221 | 2.468874  | 1.024698  |
| 1 | 0.091582  | 2.673820  | 2.034509  |
| 5 | -1.788485 | 1.284253  | 0.989101  |
| 1 | -2.257244 | 0.623135  | 1.847393  |
| 5 | -2.374416 | 1.986739  | -1.734734 |
| 1 | -3.122081 | 1.662462  | -2.595264 |
| 5 | -1.060643 | 3.150475  | -1.726152 |
| 1 | -0.807588 | 3.767307  | -2.710754 |
| 5 | -0.935491 | 3.815264  | -0.073457 |
| 1 | -0.592439 | 4.933844  | 0.139659  |
| 5 | -2.177521 | 3.030430  | 0.918137  |
| 1 | -2.823476 | 3.488904  | 1.801362  |
| 1 | -3.950989 | 1.639867  | 0.019394  |
| 5 | -2.527010 | 3.463241  | -0.771846 |
| 1 | -3.415996 | 4.205369  | -1.030428 |
| 6 | -2.472222 | -0.654067 | -0.911098 |
| 1 | -2.407946 | -0.816185 | -1.991459 |
| 1 | -1.806336 | -1.366931 | -0.421896 |
| 6 | -3.890141 | -0.922384 | -0.448031 |
| 6 | -4.986660 | -0.711386 | -1.296304 |
| 1 | -4.830722 | -0.346270 | -2.307195 |

|    |           |           |           |
|----|-----------|-----------|-----------|
| 6  | -6.271315 | -0.977303 | -0.823518 |
| 1  | -7.135893 | -0.821676 | -1.463110 |
| 6  | -6.422572 | -1.449494 | 0.479370  |
| 1  | -7.402009 | -1.672724 | 0.891235  |
| 6  | -5.272331 | -1.636306 | 1.247887  |
| 1  | -5.344628 | -2.009682 | 2.267954  |
| 7  | -4.035376 | -1.384730 | 0.805525  |
| 6  | 0.542376  | -0.532637 | 2.796330  |
| 6  | -0.200608 | -1.418174 | 1.917904  |
| 1  | 0.029700  | 0.371146  | 3.114863  |
| 1  | 1.064895  | -1.029344 | 3.611899  |
| 1  | -0.031612 | -2.484658 | 2.088019  |
| 1  | -1.253980 | -1.199098 | 1.765752  |
| 6  | 2.313801  | 0.372369  | 2.424680  |
| 1  | 2.158487  | 0.691535  | 3.456981  |
| 1  | 3.042293  | -0.442227 | 2.459501  |
| 6  | -2.923090 | 1.944646  | -0.129847 |
| 5  | -0.237807 | 0.926924  | 0.092440  |
| 6  | 3.243914  | -0.780579 | -1.008149 |
| 6  | 3.286014  | -1.812332 | -0.007884 |
| 1  | 4.159763  | -1.872394 | 0.637259  |
| 6  | 2.286459  | -2.781248 | 0.118814  |
| 1  | 2.387106  | -3.578999 | 0.849083  |
| 6  | 1.081664  | -2.664607 | -0.643926 |
| 6  | 0.980934  | -1.585895 | -1.564007 |
| 1  | 0.099049  | -1.493026 | -2.186182 |
| 6  | 2.067505  | -0.674019 | -1.754586 |
| 1  | 1.953916  | 0.116591  | -2.486267 |
| 6  | 4.483725  | 0.067825  | -1.252321 |
| 1  | 4.877057  | 0.361786  | -0.268256 |
| 6  | 5.573122  | -0.786160 | -1.939843 |
| 1  | 6.495820  | -0.206035 | -2.058461 |
| 1  | 5.242717  | -1.105887 | -2.935468 |
| 1  | 5.811680  | -1.685512 | -1.361414 |
| 6  | 4.224813  | 1.348486  | -2.057339 |
| 1  | 3.444532  | 1.967753  | -1.603851 |
| 1  | 3.921077  | 1.118837  | -3.085901 |
| 1  | 5.142255  | 1.944279  | -2.115265 |
| 6  | 0.031155  | -3.744615 | -0.581011 |
| 1  | -0.108017 | -4.114378 | 0.439480  |
| 1  | 0.330747  | -4.597068 | -1.205134 |
| 1  | -0.935519 | -3.388827 | -0.947447 |
| 44 | 1.150778  | -0.699902 | 0.491158  |
| 6  | 2.874036  | 1.606583  | 1.706035  |
| 1  | 3.146337  | 1.383643  | 0.674617  |
| 1  | 2.117535  | 2.390926  | 1.661382  |
| 6  | 4.106413  | 2.145394  | 2.457218  |
| 1  | 4.909052  | 1.397882  | 2.506889  |
| 1  | 4.507792  | 3.034658  | 1.955860  |
| 1  | 3.854570  | 2.428544  | 3.486933  |

**INT6-1**

**HF = -1297.6054078 hartree**

|   |           |           |           |
|---|-----------|-----------|-----------|
| 6 | -2.009934 | 0.575696  | -0.213248 |
| 5 | -1.206036 | 0.671998  | -1.702634 |
| 1 | -1.092485 | -0.322048 | -2.344847 |
| 5 | -0.096565 | 2.034635  | -1.557344 |
| 1 | 0.924079  | 2.075448  | -2.165668 |
| 5 | -0.251107 | 2.683638  | 0.090185  |

|   |           |           |           |
|---|-----------|-----------|-----------|
| 1 | 0.636445  | 3.206141  | 0.683447  |
| 5 | -1.451725 | 1.717224  | 0.926052  |
| 1 | -1.608272 | 1.464400  | 2.069672  |
| 5 | -2.857197 | 1.295108  | -1.549911 |
| 1 | -3.819602 | 0.736258  | -1.948138 |
| 5 | -1.657779 | 2.250932  | -2.399652 |
| 1 | -1.745719 | 2.401781  | -3.575940 |
| 5 | -1.060851 | 3.508815  | -1.281219 |
| 1 | -0.718182 | 4.583048  | -1.659124 |
| 5 | -1.906732 | 3.306228  | 0.263947  |
| 1 | -2.276497 | 4.137242  | 1.025560  |
| 1 | -3.808451 | 1.794295  | 0.582010  |
| 5 | -2.774383 | 3.041615  | -1.265319 |
| 1 | -3.729112 | 3.692971  | -1.533257 |
| 6 | -2.567202 | -0.750106 | 0.341082  |
| 1 | -2.001590 | -1.549566 | -0.141028 |
| 1 | -2.334344 | -0.793908 | 1.408164  |
| 6 | -4.050688 | -1.014330 | 0.171394  |
| 6 | -4.514541 | -2.028481 | -0.675048 |
| 1 | -3.811222 | -2.615253 | -1.258540 |
| 6 | -5.885188 | -2.268278 | -0.760261 |
| 1 | -6.267297 | -3.050945 | -1.409964 |
| 6 | -6.752472 | -1.486198 | 0.000404  |
| 1 | -7.827214 | -1.635931 | -0.031299 |
| 6 | -6.200597 | -0.494495 | 0.812244  |
| 1 | -6.841642 | 0.140592  | 1.421240  |
| 7 | -4.886904 | -0.261075 | 0.907175  |
| 6 | 1.042322  | 0.783485  | 3.268518  |
| 6 | 0.599086  | -0.413750 | 2.403986  |
| 1 | 0.515519  | 1.695366  | 2.961465  |
| 1 | 0.726208  | 0.591084  | 4.307055  |
| 1 | 0.992842  | -1.331071 | 2.867948  |
| 1 | -0.491751 | -0.488689 | 2.453949  |
| 6 | 2.552015  | 1.066895  | 3.263410  |
| 1 | 2.807819  | 1.723407  | 4.107590  |
| 1 | 3.105246  | 0.128926  | 3.423985  |
| 6 | -2.890865 | 1.951013  | 0.027083  |
| 5 | -0.265743 | 0.885783  | -0.161136 |
| 6 | 3.087958  | -1.000549 | -1.266620 |
| 6 | 3.438116  | -1.556984 | 0.020537  |
| 1 | 4.414399  | -1.320401 | 0.435166  |
| 6 | 2.586571  | -2.406823 | 0.728480  |
| 1 | 2.900405  | -2.827539 | 1.678862  |
| 6 | 1.241974  | -2.602133 | 0.272622  |
| 6 | 0.868297  | -1.993594 | -0.968338 |
| 1 | -0.125401 | -2.168366 | -1.364567 |
| 6 | 1.813983  | -1.271572 | -1.769884 |
| 1 | 1.491940  | -0.858678 | -2.717807 |
| 6 | 4.156556  | -0.224374 | -2.025597 |
| 1 | 4.646527  | 0.435736  | -1.295542 |
| 6 | 5.229545  | -1.202269 | -2.555003 |
| 1 | 6.043233  | -0.649453 | -3.038318 |
| 1 | 4.797256  | -1.885686 | -3.295754 |
| 1 | 5.663213  | -1.808520 | -1.752060 |
| 6 | 3.622087  | 0.652094  | -3.164851 |
| 1 | 2.849996  | 1.344712  | -2.818075 |
| 1 | 3.198291  | 0.045287  | -3.974453 |
| 1 | 4.440222  | 1.239715  | -3.595634 |

|    |           |           |          |
|----|-----------|-----------|----------|
| 6  | 0.309458  | -3.534190 | 1.001245 |
| 1  | 0.402076  | -3.428069 | 2.086317 |
| 1  | 0.541072  | -4.576827 | 0.744807 |
| 1  | -0.733770 | -3.348381 | 0.730612 |
| 44 | 1.371067  | -0.404911 | 0.427323 |
| 6  | 3.033318  | 1.738718  | 1.975959 |
| 1  | 2.669197  | 1.170965  | 1.084057 |
| 1  | 2.565216  | 2.725128  | 1.878944 |
| 6  | 4.553516  | 1.863353  | 1.860265 |
| 1  | 5.038009  | 0.879455  | 1.894582 |
| 1  | 4.848801  | 2.355754  | 0.926510 |
| 1  | 4.956610  | 2.456563  | 2.690532 |

**3V-2**

**HF = -1127.3869833 hartree**

|   |           |           |           |
|---|-----------|-----------|-----------|
| 7 | -3.066528 | -2.003570 | -0.364692 |
| 6 | -1.682377 | 1.195454  | -0.558573 |
| 6 | -2.205288 | 0.019285  | -1.417686 |
| 1 | -2.487175 | 0.425412  | -2.395771 |
| 1 | -1.378197 | -0.674445 | -1.571413 |
| 6 | -3.363103 | -0.798637 | -0.883005 |
| 6 | -4.691123 | -0.351539 | -0.981198 |
| 1 | -4.899524 | 0.616861  | -1.422027 |
| 6 | -5.721071 | -1.153102 | -0.499831 |
| 1 | -6.753493 | -0.817176 | -0.562785 |
| 6 | -5.406332 | -2.390798 | 0.063248  |
| 1 | -6.175291 | -3.050135 | 0.456616  |
| 6 | -4.064671 | -2.764631 | 0.099073  |
| 1 | -3.770808 | -3.727327 | 0.516669  |
| 6 | 3.477843  | -0.477009 | -0.377467 |
| 6 | 3.461613  | -1.571815 | 0.568711  |
| 1 | 4.230079  | -1.605075 | 1.337133  |
| 6 | 2.504443  | -2.583349 | 0.511670  |
| 1 | 2.522474  | -3.393909 | 1.234762  |
| 6 | 1.376908  | -2.450430 | -0.370371 |
| 6 | 1.382974  | -1.347198 | -1.295401 |
| 1 | 0.588913  | -1.267888 | -2.029882 |
| 6 | 2.481797  | -0.429172 | -1.356167 |
| 1 | 2.447112  | 0.380024  | -2.074735 |
| 6 | 4.635277  | 0.512238  | -0.305903 |
| 1 | 4.742510  | 0.797067  | 0.751379  |
| 6 | 5.950970  | -0.175907 | -0.732541 |
| 1 | 6.801760  | 0.505868  | -0.607493 |
| 1 | 5.905467  | -0.470042 | -1.788726 |
| 1 | 6.150797  | -1.078174 | -0.143596 |
| 6 | 4.422576  | 1.799004  | -1.113523 |
| 1 | 3.489447  | 2.296909  | -0.836381 |
| 1 | 4.398121  | 1.594529  | -2.191512 |
| 1 | 5.251050  | 2.494512  | -0.932805 |
| 6 | 0.310061  | -3.512585 | -0.440828 |
| 1 | 0.544359  | -4.246501 | -1.226615 |
| 1 | -0.670406 | -3.073334 | -0.649739 |
| 1 | 0.233407  | -4.051538 | 0.509340  |
| 5 | -0.250311 | 1.939575  | -1.120361 |
| 1 | 0.258037  | 1.513735  | -2.114152 |
| 5 | 0.565231  | 2.561246  | 0.320198  |
| 1 | 1.756499  | 2.654475  | 0.380876  |
| 5 | -0.424176 | 2.112460  | 1.733560  |
| 1 | 0.056115  | 1.879944  | 2.805124  |

|    |           |           |           |
|----|-----------|-----------|-----------|
| 5  | -1.834417 | 1.222601  | 1.140999  |
| 1  | -2.407796 | 0.335229  | 1.684225  |
| 1  | -3.959103 | 2.145036  | -0.000421 |
| 5  | -1.805666 | 2.773112  | -1.275466 |
| 1  | -2.318308 | 2.846289  | -2.351518 |
| 5  | -0.393469 | 3.664167  | -0.707468 |
| 1  | 0.123723  | 4.497259  | -1.391839 |
| 5  | -0.505008 | 3.772058  | 1.073139  |
| 1  | -0.065958 | 4.707424  | 1.675516  |
| 5  | -1.999855 | 2.941135  | 1.580450  |
| 1  | -2.642787 | 3.264442  | 2.534702  |
| 5  | -1.976613 | 3.899529  | 0.075647  |
| 1  | -2.608755 | 4.907295  | -0.044871 |
| 6  | -0.102238 | -1.360589 | 2.112373  |
| 1  | 0.285936  | -2.320133 | 2.488389  |
| 1  | -0.121369 | -0.633466 | 2.938310  |
| 1  | -1.128383 | -1.507845 | 1.769338  |
| 5  | -2.789560 | 2.326080  | 0.126363  |
| 44 | 1.242452  | -0.583892 | 0.704872  |
| 5  | -0.228203 | 0.951155  | 0.384319  |

V-2

HF = -1205.9481362 hartree

|   |           |           |           |
|---|-----------|-----------|-----------|
| 6 | -1.758162 | 0.959382  | -0.381277 |
| 5 | -0.509683 | 1.716241  | -1.256053 |
| 1 | -0.077380 | 1.177750  | -2.228366 |
| 5 | 0.351378  | 2.745499  | -0.119382 |
| 1 | 1.510015  | 3.006677  | -0.262281 |
| 5 | -0.411119 | 2.530129  | 1.470806  |
| 1 | 0.168299  | 2.655174  | 2.504287  |
| 5 | -1.715764 | 1.356993  | 1.272113  |
| 1 | -2.121820 | 0.587859  | 2.083812  |
| 5 | -2.184314 | 2.294478  | -1.387558 |
| 1 | -2.792427 | 2.055478  | -2.389027 |
| 5 | -0.863385 | 3.455910  | -1.221105 |
| 1 | -0.545928 | 4.154837  | -2.138772 |
| 5 | -0.808709 | 3.964752  | 0.480561  |
| 1 | -0.450012 | 5.059023  | 0.804772  |
| 5 | -2.093638 | 3.098497  | 1.352890  |
| 1 | -2.668075 | 3.548061  | 2.300170  |
| 1 | -4.071078 | 1.724213  | 0.281228  |
| 5 | -2.378231 | 3.679831  | -0.309831 |
| 1 | -3.161307 | 4.547416  | -0.563185 |
| 6 | -2.182539 | -0.441906 | -0.878016 |
| 1 | -2.075757 | -0.445561 | -1.969635 |
| 1 | -1.477447 | -1.167706 | -0.472412 |
| 6 | -3.575712 | -0.930967 | -0.541597 |
| 6 | -4.699508 | -0.485664 | -1.258644 |
| 1 | -4.574016 | 0.261141  | -2.036234 |
| 6 | -5.954885 | -0.995050 | -0.947501 |
| 1 | -6.835475 | -0.658618 | -1.490003 |
| 6 | -6.063994 | -1.940002 | 0.075305  |
| 1 | -7.023410 | -2.365609 | 0.357268  |
| 6 | -4.896472 | -2.326712 | 0.729326  |
| 1 | -4.933423 | -3.063771 | 1.531765  |
| 7 | -3.680638 | -1.850144 | 0.433175  |
| 6 | 0.943592  | -1.600446 | 2.524937  |
| 6 | -0.236989 | -1.629276 | 1.755602  |
| 1 | 1.017377  | -0.923772 | 3.370465  |

|    |           |           |           |
|----|-----------|-----------|-----------|
| 1  | 1.570738  | -2.489318 | 2.615550  |
| 1  | -0.517709 | -2.540758 | 1.227125  |
| 1  | -1.076632 | -1.004630 | 2.022848  |
| 6  | 2.196232  | 0.775720  | 2.009657  |
| 1  | 2.511712  | 1.683451  | 1.486016  |
| 1  | 1.522726  | 1.072419  | 2.812592  |
| 1  | 3.075200  | 0.280835  | 2.451236  |
| 5  | -0.136751 | 1.094144  | 0.414679  |
| 6  | 3.454163  | -0.406072 | -0.597265 |
| 6  | 3.407074  | -1.639879 | 0.112683  |
| 1  | 4.173205  | -1.867004 | 0.848588  |
| 6  | 2.385077  | -2.587516 | -0.144458 |
| 1  | 2.381608  | -3.526053 | 0.405409  |
| 6  | 1.388056  | -2.358586 | -1.129448 |
| 6  | 1.354585  | -1.081455 | -1.715648 |
| 1  | 0.566672  | -0.827484 | -2.414000 |
| 6  | 2.379071  | -0.114437 | -1.458813 |
| 1  | 2.309847  | 0.847352  | -1.949628 |
| 6  | 4.636120  | 0.530285  | -0.381132 |
| 1  | 4.750397  | 0.646950  | 0.705424  |
| 6  | 5.927473  | -0.121757 | -0.922112 |
| 1  | 6.792974  | 0.520012  | -0.716262 |
| 1  | 5.864627  | -0.264300 | -2.008370 |
| 1  | 6.115667  | -1.100274 | -0.466797 |
| 6  | 4.455756  | 1.929257  | -0.983272 |
| 1  | 3.547545  | 2.415942  | -0.617739 |
| 1  | 4.404622  | 1.889030  | -2.078897 |
| 1  | 5.313054  | 2.558995  | -0.717378 |
| 6  | 0.384712  | -3.425878 | -1.484560 |
| 1  | 0.060552  | -3.980597 | -0.596579 |
| 1  | 0.818078  | -4.152409 | -2.185782 |
| 1  | -0.503569 | -2.994610 | -1.954826 |
| 5  | -2.939600 | 2.078937  | 0.193828  |
| 44 | 1.349595  | -0.615919 | 0.628592  |

**3TS1-2**

HF = -1205.914001 hartree

$\nu^{\ddagger} = -460.1923 \text{ icm}^{-1}$

|   |           |           |           |
|---|-----------|-----------|-----------|
| 6 | -1.758824 | 0.945170  | -0.425765 |
| 5 | -0.520668 | 1.721361  | -1.301817 |
| 1 | -0.122465 | 1.210992  | -2.305228 |
| 5 | 0.394045  | 2.669998  | -0.133195 |
| 1 | 1.556065  | 2.912643  | -0.285182 |
| 5 | -0.322212 | 2.378610  | 1.463945  |
| 1 | 0.305045  | 2.415838  | 2.480371  |
| 5 | -1.661116 | 1.246313  | 1.243716  |
| 1 | -2.039920 | 0.421945  | 2.014313  |
| 5 | -2.187214 | 2.338661  | -1.344006 |
| 1 | -2.835438 | 2.173588  | -2.334803 |
| 5 | -0.837375 | 3.464565  | -1.154647 |
| 1 | -0.537372 | 4.212532  | -2.038792 |
| 5 | -0.718898 | 3.875268  | 0.572251  |
| 1 | -0.327358 | 4.942979  | 0.944127  |
| 5 | -1.995258 | 2.986391  | 1.437851  |
| 1 | -2.531300 | 3.395358  | 2.425529  |
| 1 | -4.035746 | 1.713959  | 0.349409  |
| 5 | -2.318752 | 3.664843  | -0.182029 |
| 1 | -3.088850 | 4.562028  | -0.361106 |
| 6 | -2.214729 | -0.429206 | -0.962277 |
| 1 | -2.117874 | -0.405709 | -2.054315 |



|    |           |           |           |
|----|-----------|-----------|-----------|
| 1  | -1.516009 | -1.174972 | -0.580455 |
| 6  | -3.612952 | -0.895790 | -0.620195 |
| 6  | -4.731393 | -0.435879 | -1.336035 |
| 1  | -4.595579 | 0.303239  | -2.119397 |
| 6  | -5.994492 | -0.920318 | -1.016213 |
| 1  | -6.871186 | -0.572661 | -1.557975 |
| 6  | -6.116109 | -1.855389 | 0.014138  |
| 1  | -7.081633 | -2.262433 | 0.302546  |
| 6  | -4.953099 | -2.257065 | 0.667499  |
| 1  | -5.000135 | -2.986812 | 1.476004  |
| 7  | -3.730416 | -1.804459 | 0.363112  |
| 6  | 0.641531  | -0.785519 | 2.789190  |
| 6  | -0.032653 | -1.618304 | 1.818884  |
| 1  | 0.044965  | 0.027152  | 3.190957  |
| 1  | 1.238937  | -1.294254 | 3.546720  |
| 1  | 0.198212  | -2.687010 | 1.854550  |
| 1  | -1.086416 | -1.421471 | 1.643944  |
| 6  | 2.229507  | 0.389843  | 2.433925  |
| 1  | 2.429422  | 1.181725  | 1.708973  |
| 1  | 1.937260  | 0.899862  | 3.350043  |
| 1  | 3.114743  | -0.221317 | 2.619966  |
| 5  | -0.126003 | 1.005391  | 0.312853  |
| 6  | 3.469279  | -0.395579 | -0.687737 |
| 6  | 3.485689  | -1.628338 | 0.062385  |
| 1  | 4.287118  | -1.791455 | 0.779442  |
| 6  | 2.519357  | -2.621303 | -0.108178 |
| 1  | 2.575608  | -3.542587 | 0.465941  |
| 6  | 1.374820  | -2.370429 | -0.937853 |
| 6  | 1.330730  | -1.145863 | -1.660050 |
| 1  | 0.500076  | -0.941079 | -2.324192 |
| 6  | 2.385503  | -0.180688 | -1.548803 |
| 1  | 2.290590  | 0.746243  | -2.100049 |
| 6  | 4.616297  | 0.586451  | -0.495620 |
| 1  | 4.684808  | 0.787579  | 0.586280  |
| 6  | 5.956963  | -0.045929 | -0.929589 |
| 1  | 6.789929  | 0.636519  | -0.718223 |
| 1  | 5.953942  | -0.252108 | -2.007433 |
| 1  | 6.156494  | -0.990182 | -0.410977 |
| 6  | 4.419750  | 1.933953  | -1.201508 |
| 1  | 3.486593  | 2.417353  | -0.900067 |
| 1  | 4.405803  | 1.812926  | -2.292383 |
| 1  | 5.249427  | 2.607700  | -0.955906 |
| 6  | 0.344007  | -3.449963 | -1.156300 |
| 1  | 0.115925  | -3.978671 | -0.224825 |
| 1  | 0.709404  | -4.192209 | -1.880823 |
| 1  | -0.590800 | -3.035385 | -1.542605 |
| 5  | -2.899544 | 2.050673  | 0.249449  |
| 44 | 1.324330  | -0.657503 | 0.515741  |

**INT5-2**

**HF = -1205.966589 hartree**

|   |           |          |           |
|---|-----------|----------|-----------|
| 6 | -1.829073 | 0.982869 | -0.388370 |
| 5 | -0.677563 | 1.836033 | -1.310166 |
| 1 | -0.386433 | 1.415190 | -2.389417 |
| 5 | 0.354198  | 2.682125 | -0.163566 |
| 1 | 1.491619  | 2.938382 | -0.423745 |
| 5 | -0.194970 | 2.245138 | 1.468463  |
| 1 | 0.544853  | 2.174357 | 2.407999  |
| 5 | -1.567911 | 1.139681 | 1.284630  |

|   |           |           |           |
|---|-----------|-----------|-----------|
| 1 | -1.880777 | 0.250655  | 2.011584  |
| 5 | -2.335215 | 2.452460  | -1.130423 |
| 1 | -3.081056 | 2.374844  | -2.061335 |
| 5 | -0.966124 | 3.559901  | -0.980095 |
| 1 | -0.749546 | 4.382983  | -1.820719 |
| 5 | -0.669942 | 3.816534  | 0.756368  |
| 1 | -0.234923 | 4.848117  | 1.178644  |
| 5 | -1.860870 | 2.854845  | 1.664328  |
| 1 | -2.293113 | 3.174159  | 2.732676  |
| 1 | -4.012590 | 1.683897  | 0.678170  |
| 5 | -2.339664 | 3.672667  | 0.150624  |
| 1 | -3.117098 | 4.581081  | 0.128752  |
| 6 | -2.341056 | -0.335981 | -1.011473 |
| 1 | -2.344224 | -0.201045 | -2.099616 |
| 1 | -1.617279 | -1.118635 | -0.776446 |
| 6 | -3.708523 | -0.832038 | -0.593297 |
| 6 | -4.880918 | -0.286911 | -1.144445 |
| 1 | -4.805583 | 0.537308  | -1.846688 |
| 6 | -6.116901 | -0.797995 | -0.765855 |
| 1 | -7.033846 | -0.385599 | -1.180770 |
| 6 | -6.158495 | -1.844618 | 0.158085  |
| 1 | -7.099800 | -2.277344 | 0.486487  |
| 6 | -4.946988 | -2.323959 | 0.651160  |
| 1 | -4.931293 | -3.141062 | 1.372703  |
| 7 | -3.750309 | -1.845495 | 0.288447  |
| 6 | 0.695841  | -1.077093 | 2.495298  |
| 6 | -0.006540 | -1.794548 | 1.381622  |
| 1 | 1.392180  | -0.228231 | 2.069275  |
| 1 | 0.012214  | -0.434905 | 3.059662  |
| 1 | 0.227742  | -2.864773 | 1.322452  |
| 1 | -1.078818 | -1.626367 | 1.320461  |
| 6 | 1.580731  | -1.919161 | 3.417943  |
| 1 | 2.249784  | -2.562534 | 2.834522  |
| 1 | 2.198513  | -1.295235 | 4.076553  |
| 1 | 0.958728  | -2.564841 | 4.050537  |
| 5 | -0.138706 | 0.984655  | 0.190323  |
| 6 | 3.579978  | -0.181402 | -0.512220 |
| 6 | 3.517362  | -1.564121 | -0.106640 |
| 1 | 4.218238  | -1.917445 | 0.646498  |
| 6 | 2.581111  | -2.454701 | -0.641190 |
| 1 | 2.554035  | -3.485761 | -0.297902 |
| 6 | 1.566451  | -1.981755 | -1.539818 |
| 6 | 1.629395  | -0.619266 | -1.949086 |
| 1 | 0.893030  | -0.236752 | -2.644623 |
| 6 | 2.659777  | 0.259566  | -1.477386 |
| 1 | 2.645613  | 1.294020  | -1.796943 |
| 6 | 4.715332  | 0.675198  | 0.035836  |
| 1 | 4.832001  | 0.402269  | 1.094938  |
| 6 | 6.036422  | 0.314194  | -0.678829 |
| 1 | 6.878682  | 0.863560  | -0.239046 |
| 1 | 5.980628  | 0.575525  | -1.742995 |
| 1 | 6.255859  | -0.757574 | -0.609023 |
| 6 | 4.467994  | 2.187455  | -0.027740 |
| 1 | 3.524217  | 2.464565  | 0.448378  |
| 1 | 4.435668  | 2.545917  | -1.063824 |
| 1 | 5.284482  | 2.719748  | 0.475705  |
| 6 | 0.555149  | -2.932036 | -2.129041 |
| 1 | 0.197065  | -3.644314 | -1.378492 |

|    |           |           |           |
|----|-----------|-----------|-----------|
| 1  | 0.994702  | -3.507025 | -2.957591 |
| 1  | -0.311265 | -2.389681 | -2.517530 |
| 5  | -2.888844 | 2.027508  | 0.493948  |
| 44 | 1.325130  | -0.656112 | 0.233230  |

VI-2

HF = -1284.5039455 hartree

|   |           |           |           |
|---|-----------|-----------|-----------|
| 6 | -1.907025 | 0.917374  | -0.578760 |
| 5 | -0.650898 | 1.414758  | -1.604241 |
| 1 | -0.323534 | 0.699427  | -2.500593 |
| 5 | 0.357536  | 2.521865  | -0.685804 |
| 1 | 1.517292  | 2.653919  | -0.939958 |
| 5 | -0.327617 | 2.620687  | 0.952696  |
| 1 | 0.310672  | 2.845325  | 1.932572  |
| 5 | -1.734011 | 1.551147  | 0.992538  |
| 1 | -2.156992 | 0.956452  | 1.932650  |
| 5 | -2.274228 | 2.125656  | -1.754577 |
| 1 | -2.956879 | 1.793403  | -2.678130 |
| 5 | -0.853033 | 3.167790  | -1.827380 |
| 1 | -0.526730 | 3.687458  | -2.854230 |
| 5 | -0.658097 | 3.920076  | -0.229644 |
| 1 | -0.188555 | 5.011654  | -0.092939 |
| 5 | -1.959546 | 3.313914  | 0.821214  |
| 1 | -2.438647 | 3.950234  | 1.712593  |
| 1 | -4.101812 | 1.986459  | 0.066471  |
| 5 | -2.288095 | 3.667350  | -0.896035 |
| 1 | -3.008715 | 4.555366  | -1.244963 |
| 6 | -2.482798 | -0.486007 | -0.880983 |
| 1 | -2.473895 | -0.602936 | -1.971277 |
| 1 | -1.803567 | -1.229930 | -0.467743 |
| 6 | -3.877147 | -0.821562 | -0.392080 |
| 6 | -5.017507 | -0.326370 | -1.048059 |
| 1 | -4.897329 | 0.350144  | -1.888124 |
| 6 | -6.279509 | -0.698927 | -0.600240 |
| 1 | -7.172084 | -0.322072 | -1.094325 |
| 6 | -6.379004 | -1.560269 | 0.494854  |
| 1 | -7.342848 | -1.878281 | 0.883388  |
| 6 | -5.196164 | -2.007001 | 1.079022  |
| 1 | -5.225161 | -2.683871 | 1.933086  |
| 7 | -3.974657 | -1.661430 | 0.652283  |
| 6 | 0.588290  | -1.697644 | 2.475873  |
| 6 | -0.581150 | -1.504644 | 1.716788  |
| 1 | 0.781934  | -1.065353 | 3.335833  |
| 1 | 1.051480  | -2.683036 | 2.543720  |
| 1 | -1.028760 | -2.343547 | 1.188351  |
| 1 | -1.287898 | -0.740209 | 2.002200  |
| 6 | 1.993429  | 0.585331  | 2.077531  |
| 1 | 1.171785  | 0.994331  | 2.672228  |
| 1 | 2.566387  | -0.087569 | 2.735311  |
| 6 | 3.222994  | -0.827045 | -0.885345 |
| 6 | 3.186608  | -1.906629 | 0.050830  |
| 1 | 4.019796  | -2.053538 | 0.732511  |
| 6 | 2.138388  | -2.850951 | 0.016953  |
| 1 | 2.167329  | -3.700165 | 0.695860  |
| 6 | 1.044340  | -2.718522 | -0.873966 |
| 6 | 0.983696  | -1.538403 | -1.643060 |
| 1 | 0.135590  | -1.355739 | -2.290863 |
| 6 | 2.082485  | -0.623119 | -1.673324 |
| 1 | 2.014504  | 0.235967  | -2.328822 |

|    |           |           |           |
|----|-----------|-----------|-----------|
| 6  | 4.513452  | -0.039762 | -1.061554 |
| 1  | 4.924029  | 0.140172  | -0.059709 |
| 6  | 5.536917  | -0.914309 | -1.822016 |
| 1  | 6.496410  | -0.389439 | -1.909546 |
| 1  | 5.179190  | -1.136384 | -2.835106 |
| 1  | 5.715263  | -1.867924 | -1.312552 |
| 6  | 4.350001  | 1.315217  | -1.761296 |
| 1  | 3.591203  | 1.933840  | -1.276221 |
| 1  | 4.064087  | 1.190205  | -2.813069 |
| 1  | 5.302508  | 1.858137  | -1.745093 |
| 6  | -0.014953 | -3.786553 | -0.973260 |
| 1  | 0.295886  | -4.579761 | -1.666997 |
| 1  | -0.960079 | -3.375150 | -1.339298 |
| 1  | -0.204629 | -4.255271 | -0.001217 |
| 5  | -2.951737 | 2.215449  | -0.129271 |
| 44 | 1.141789  | -0.755032 | 0.590707  |
| 6  | 2.933825  | 1.723675  | 1.676565  |
| 1  | 3.828966  | 1.321193  | 1.183679  |
| 1  | 2.456323  | 2.397166  | 0.962922  |
| 6  | 3.392792  | 2.544009  | 2.895914  |
| 1  | 3.893845  | 1.908618  | 3.640139  |
| 1  | 4.093862  | 3.340390  | 2.608059  |
| 1  | 2.533667  | 3.016240  | 3.387083  |
| 5  | -0.224626 | 1.022945  | 0.133053  |

**3TS2-2**

HF = -1284.4657935 hartree  $v^{\ddagger} = -346.9146 \text{ icm}^{-1}$

|   |           |           |           |
|---|-----------|-----------|-----------|
| 6 | -1.942156 | 0.888977  | -0.573016 |
| 5 | -0.690873 | 1.474246  | -1.569021 |
| 1 | -0.348406 | 0.815030  | -2.503383 |
| 5 | 0.302131  | 2.526662  | -0.561980 |
| 1 | 1.467853  | 2.686704  | -0.776008 |
| 5 | -0.394681 | 2.490295  | 1.073742  |
| 1 | 0.237060  | 2.633128  | 2.077609  |
| 5 | -1.786885 | 1.410607  | 1.034328  |
| 1 | -2.186871 | 0.726233  | 1.922058  |
| 5 | -2.324070 | 2.166038  | -1.665417 |
| 1 | -3.003802 | 1.898363  | -2.611840 |
| 5 | -0.916242 | 3.235377  | -1.659355 |
| 1 | -0.600353 | 3.836670  | -2.643926 |
| 5 | -0.735458 | 3.871761  | -0.007673 |
| 1 | -0.282557 | 4.957969  | 0.208284  |
| 5 | -2.033661 | 3.176453  | 0.992113  |
| 1 | -2.520806 | 3.742895  | 1.925670  |
| 1 | -4.158327 | 1.878471  | 0.131009  |
| 5 | -2.361379 | 3.645108  | -0.697739 |
| 1 | -3.091440 | 4.547687  | -0.984455 |
| 6 | -2.487262 | -0.514591 | -0.914536 |
| 1 | -2.430419 | -0.632853 | -2.003199 |
| 1 | -1.817211 | -1.247951 | -0.464032 |
| 6 | -3.894568 | -0.856281 | -0.473550 |
| 6 | -5.014774 | -0.410180 | -1.195282 |
| 1 | -4.871245 | 0.227343  | -2.062026 |
| 6 | -6.288451 | -0.774609 | -0.774487 |
| 1 | -7.166544 | -0.433645 | -1.318160 |
| 6 | -6.418605 | -1.579123 | 0.359790  |
| 1 | -7.392579 | -1.887874 | 0.730088  |
| 6 | -5.253218 | -1.980232 | 1.009050  |
| 1 | -5.306675 | -2.611674 | 1.896029  |

|    |           |           |           |
|----|-----------|-----------|-----------|
| 7  | -4.020796 | -1.642134 | 0.609314  |
| 6  | 0.467101  | -0.535362 | 2.792998  |
| 6  | -0.277660 | -1.403621 | 1.901275  |
| 1  | -0.022009 | 0.393144  | 3.072946  |
| 1  | 0.945543  | -1.038378 | 3.633411  |
| 1  | -0.141895 | -2.475333 | 2.077571  |
| 1  | -1.316883 | -1.148559 | 1.715522  |
| 6  | 2.287939  | 0.276564  | 2.465068  |
| 1  | 2.118037  | 0.629448  | 3.485345  |
| 1  | 2.973742  | -0.574273 | 2.537607  |
| 5  | -0.276059 | 0.965826  | 0.122182  |
| 6  | 3.185150  | -0.822419 | -1.064733 |
| 6  | 3.245433  | -1.868866 | -0.077221 |
| 1  | 4.141631  | -1.950366 | 0.535450  |
| 6  | 2.232538  | -2.816850 | 0.074543  |
| 1  | 2.338173  | -3.624482 | 0.794244  |
| 6  | 0.992716  | -2.645879 | -0.623659 |
| 6  | 0.884924  | -1.562652 | -1.544600 |
| 1  | -0.018280 | -1.434892 | -2.127294 |
| 6  | 1.989293  | -0.681861 | -1.771262 |
| 1  | 1.862724  | 0.122690  | -2.485134 |
| 6  | 4.434813  | 0.000370  | -1.343461 |
| 1  | 4.879226  | 0.261635  | -0.371141 |
| 6  | 5.475678  | -0.858793 | -2.096421 |
| 1  | 6.409931  | -0.300405 | -2.239270 |
| 1  | 5.095887  | -1.143590 | -3.085572 |
| 1  | 5.711036  | -1.780375 | -1.551762 |
| 6  | 4.173893  | 1.307747  | -2.103637 |
| 1  | 3.419392  | 1.923718  | -1.605333 |
| 1  | 3.825016  | 1.110820  | -3.124900 |
| 1  | 5.100911  | 1.888458  | -2.181495 |
| 6  | -0.081272 | -3.702139 | -0.533230 |
| 1  | 0.134980  | -4.525557 | -1.229002 |
| 1  | -1.065091 | -3.298709 | -0.786407 |
| 1  | -0.143152 | -4.126528 | 0.474098  |
| 5  | -3.010060 | 2.136565  | -0.037993 |
| 44 | 1.114351  | -0.716427 | 0.501908  |
| 6  | 2.936309  | 1.465443  | 1.741744  |
| 1  | 3.273922  | 1.190119  | 0.742410  |
| 1  | 2.205813  | 2.263841  | 1.609278  |
| 6  | 4.131408  | 2.004842  | 2.551291  |
| 1  | 4.905909  | 1.238052  | 2.694039  |
| 1  | 4.595939  | 2.858137  | 2.039956  |
| 1  | 3.816758  | 2.345003  | 3.546668  |

**INT6-2**

**HF = -1284.5239099 hartree**

|   |           |           |           |
|---|-----------|-----------|-----------|
| 6 | -2.013785 | 0.983223  | -0.274601 |
| 5 | -0.883614 | 1.940654  | -1.125346 |
| 1 | -0.608174 | 1.631760  | -2.246296 |
| 5 | 0.174272  | 2.650298  | 0.090383  |
| 1 | 1.311506  | 2.930284  | -0.146740 |
| 5 | -0.347908 | 2.031175  | 1.674874  |
| 1 | 0.404915  | 1.869469  | 2.589399  |
| 5 | -1.725869 | 0.952191  | 1.401693  |
| 1 | -2.019383 | -0.019235 | 2.019585  |
| 5 | -2.534702 | 2.524995  | -0.844402 |
| 1 | -3.298897 | 2.553730  | -1.762359 |
| 5 | -1.163365 | 3.613919  | -0.598388 |

|    |           |           |           |
|----|-----------|-----------|-----------|
| 1  | -0.963942 | 4.526727  | -1.344989 |
| 5  | -0.830623 | 3.672478  | 1.150731  |
| 1  | -0.387262 | 4.650113  | 1.678527  |
| 5  | -2.008372 | 2.614860  | 1.970135  |
| 1  | -2.417772 | 2.817498  | 3.074821  |
| 1  | -4.178676 | 1.557610  | 0.898226  |
| 5  | -2.512744 | 3.594297  | 0.565156  |
| 1  | -3.287109 | 4.500223  | 0.661542  |
| 6  | -2.529776 | -0.275814 | -1.005748 |
| 1  | -2.460357 | -0.080646 | -2.082872 |
| 1  | -1.849625 | -1.095837 | -0.771228 |
| 6  | -3.932145 | -0.759421 | -0.700959 |
| 6  | -5.063036 | -0.109586 | -1.224293 |
| 1  | -4.934880 | 0.789545  | -1.818288 |
| 6  | -6.328336 | -0.618615 | -0.955599 |
| 1  | -7.214522 | -0.126353 | -1.349656 |
| 6  | -6.439615 | -1.767852 | -0.169717 |
| 1  | -7.406507 | -2.202783 | 0.069165  |
| 6  | -5.264428 | -2.347784 | 0.302806  |
| 1  | -5.302940 | -3.247346 | 0.917414  |
| 7  | -4.039747 | -1.871677 | 0.045354  |
| 6  | 0.402738  | -1.510648 | 2.859986  |
| 6  | 0.137385  | -1.804782 | 1.369960  |
| 1  | -0.025986 | -0.540146 | 3.133462  |
| 1  | -0.145880 | -2.260378 | 3.456182  |
| 1  | 0.461891  | -2.839718 | 1.167240  |
| 1  | -0.942966 | -1.775899 | 1.206132  |
| 6  | 1.878915  | -1.544990 | 3.293821  |
| 1  | 1.939425  | -1.674802 | 4.385726  |
| 1  | 2.372131  | -2.426102 | 2.852473  |
| 5  | -0.325435 | 0.928389  | 0.261171  |
| 6  | 3.212379  | -0.056756 | -1.387724 |
| 6  | 3.386526  | -1.357420 | -0.779870 |
| 1  | 4.289479  | -1.542318 | -0.202784 |
| 6  | 2.450136  | -2.380059 | -0.928136 |
| 1  | 2.621654  | -3.350297 | -0.470278 |
| 6  | 1.180704  | -2.095631 | -1.535061 |
| 6  | 0.983441  | -0.787773 | -2.094675 |
| 1  | 0.056124  | -0.565262 | -2.610106 |
| 6  | 2.033712  | 0.190333  | -2.095654 |
| 1  | 1.845214  | 1.157092  | -2.545172 |
| 6  | 4.367421  | 0.933633  | -1.287846 |
| 1  | 4.702327  | 0.926501  | -0.239971 |
| 6  | 5.553196  | 0.448143  | -2.150945 |
| 1  | 6.417300  | 1.113306  | -2.028525 |
| 1  | 5.277497  | 0.442873  | -3.212931 |
| 1  | 5.866322  | -0.567047 | -1.882353 |
| 6  | 4.003128  | 2.378322  | -1.649502 |
| 1  | 3.152634  | 2.737659  | -1.064037 |
| 1  | 3.748543  | 2.472151  | -2.712799 |
| 1  | 4.858672  | 3.037717  | -1.459580 |
| 6  | 0.161769  | -3.188446 | -1.733554 |
| 1  | 0.413781  | -3.788730 | -2.620011 |
| 1  | -0.839988 | -2.775974 | -1.880120 |
| 1  | 0.123014  | -3.861962 | -0.871824 |
| 5  | -3.058162 | 1.920771  | 0.736341  |
| 44 | 1.235631  | -0.578584 | 0.031985  |
| 6  | 2.660115  | -0.281076 | 2.922837  |

|   |          |           |          |
|---|----------|-----------|----------|
| 1 | 2.530507 | -0.061477 | 1.842344 |
| 1 | 2.226376 | 0.582088  | 3.441191 |
| 6 | 4.160908 | -0.372620 | 3.211706 |
| 1 | 4.624063 | -1.191234 | 2.644828 |
| 1 | 4.681232 | 0.556274  | 2.947660 |
| 1 | 4.345178 | -0.566063 | 4.277034 |

**4V** HF = -923.2207069 hartree

|    |           |           |           |
|----|-----------|-----------|-----------|
| 40 | 0.913002  | -1.201956 | -0.838352 |
| 7  | -0.972627 | 3.121927  | -0.086579 |
| 5  | -0.702069 | 1.762941  | -0.119582 |
| 5  | -1.804571 | -0.550072 | -1.196906 |
| 1  | -1.136307 | -0.317274 | -2.168328 |
| 5  | -1.780387 | -2.146452 | -0.460258 |
| 1  | -1.050442 | -2.950664 | -1.006157 |
| 5  | -1.725458 | -1.961859 | 1.295405  |
| 1  | -1.041180 | -2.675128 | 1.948585  |
| 5  | -1.688912 | -0.205284 | 1.634130  |
| 1  | -1.024319 | 0.291258  | 2.476305  |
| 5  | -3.282129 | 0.292362  | -0.734114 |
| 1  | -3.693522 | 1.148099  | -1.441318 |
| 5  | -3.297192 | -1.470811 | -1.098040 |
| 1  | -3.808577 | -1.889056 | -2.082255 |
| 5  | -3.270439 | -2.352757 | 0.478035  |
| 1  | -3.785122 | -3.411201 | 0.613872  |
| 5  | -3.206377 | -1.125261 | 1.791707  |
| 1  | -3.683778 | -1.292903 | 2.863207  |
| 5  | -3.217019 | 0.489671  | 1.031662  |
| 1  | -3.621647 | 1.469012  | 1.555822  |
| 5  | -4.183585 | -0.827971 | 0.315408  |
| 1  | -5.368108 | -0.796421 | 0.346852  |
| 6  | -0.961434 | -0.855972 | 0.254342  |
| 6  | -1.787562 | 0.580798  | 0.096782  |
| 6  | -2.291624 | 3.740465  | 0.094478  |
| 1  | -3.082573 | 2.996121  | 0.095206  |
| 6  | 0.072604  | 4.144293  | -0.230841 |
| 1  | -0.120588 | 4.759948  | -1.117370 |
| 6  | 0.761985  | 1.221205  | -0.470127 |
| 6  | 1.243851  | 1.057352  | -1.804433 |
| 1  | 0.677934  | 1.300793  | -2.697897 |
| 6  | 2.517501  | 0.432923  | -1.808989 |
| 1  | 3.116375  | 0.212154  | -2.686081 |
| 6  | 4.175222  | -0.088349 | 0.147519  |
| 1  | 5.002712  | -0.409279 | -0.478332 |
| 6  | 4.292407  | -0.052031 | 1.520680  |
| 1  | 5.226766  | -0.345271 | 1.989283  |
| 6  | 3.209489  | 0.366716  | 2.343331  |
| 1  | 3.343243  | 0.377008  | 3.420857  |
| 6  | 2.004801  | 0.772175  | 1.806041  |
| 1  | 1.197044  | 1.110379  | 2.446398  |
| 6  | 1.860435  | 0.796493  | 0.391478  |
| 6  | 2.953457  | 0.332438  | -0.438461 |
| 6  | 2.084486  | -2.651473 | 0.316167  |
| 1  | 1.341210  | -3.389662 | 0.664261  |
| 1  | 2.752141  | -3.158342 | -0.405586 |
| 1  | 2.696415  | -2.341849 | 1.167780  |
| 1  | 1.057201  | 3.686787  | -0.324103 |

|   |           |          |           |
|---|-----------|----------|-----------|
| 1 | 0.070923  | 4.802598 | 0.645808  |
| 1 | -2.477396 | 4.448150 | -0.721637 |
| 1 | -2.323094 | 4.294787 | 1.039933  |

**VII** HF = -1001.8410966 hartree

|    |           |           |           |
|----|-----------|-----------|-----------|
| 40 | 1.009187  | -1.108901 | -0.223477 |
| 7  | -1.320283 | 3.032109  | -0.949086 |
| 5  | -0.935576 | 1.762281  | -0.542473 |
| 5  | -1.818244 | -0.847822 | -0.890911 |
| 1  | -1.143990 | -0.856278 | -1.880309 |
| 5  | -1.735372 | -2.154242 | 0.289585  |
| 1  | -0.964018 | -3.047508 | 0.035216  |
| 5  | -1.753094 | -1.450483 | 1.905688  |
| 1  | -1.057680 | -1.890466 | 2.758643  |
| 5  | -1.827315 | 0.321859  | 1.704661  |
| 1  | -1.226128 | 1.088680  | 2.373995  |
| 5  | -3.367195 | -0.011605 | -0.720991 |
| 1  | -3.804154 | 0.564629  | -1.658721 |
| 5  | -3.263216 | -1.795319 | -0.544528 |
| 1  | -3.718919 | -2.519616 | -1.366168 |
| 5  | -3.243127 | -2.164863 | 1.221615  |
| 1  | -3.699207 | -3.167494 | 1.659700  |
| 5  | -3.294821 | -0.603111 | 2.110765  |
| 1  | -3.795899 | -0.477616 | 3.177621  |
| 5  | -3.375416 | 0.705794  | 0.904845  |
| 1  | -3.850911 | 1.769572  | 1.106076  |
| 5  | -4.238242 | -0.824105 | 0.599168  |
| 1  | -5.423389 | -0.863855 | 0.600019  |
| 6  | -1.009085 | -0.660756 | 0.592636  |
| 6  | -1.926347 | 0.609529  | 0.005668  |
| 6  | -2.691460 | 3.552800  | -1.004388 |
| 1  | -3.420266 | 2.780283  | -0.778931 |
| 6  | -0.357132 | 4.050892  | -1.387230 |
| 1  | -0.555277 | 4.336188  | -2.427487 |
| 6  | 0.587173  | 1.293517  | -0.654200 |
| 6  | 1.180162  | 0.766142  | -1.839798 |
| 1  | 0.659979  | 0.640100  | -2.783321 |
| 6  | 2.508529  | 0.335801  | -1.588849 |
| 1  | 3.196250  | -0.073600 | -2.320096 |
| 6  | 4.052803  | 0.676017  | 0.497047  |
| 1  | 4.952806  | 0.262750  | 0.050817  |
| 6  | 4.064328  | 1.186145  | 1.777588  |
| 1  | 4.984523  | 1.173618  | 2.353619  |
| 6  | 2.892435  | 1.743640  | 2.360861  |
| 1  | 2.946828  | 2.140671  | 3.370076  |
| 6  | 1.699185  | 1.803799  | 1.670906  |
| 1  | 0.819680  | 2.251081  | 2.121748  |
| 6  | 1.655088  | 1.317842  | 0.336660  |
| 6  | 2.844914  | 0.736720  | -0.245334 |
| 6  | 2.138701  | -1.848161 | 1.512306  |
| 1  | 1.442850  | -2.553036 | 2.000879  |
| 1  | 3.001266  | -2.424907 | 1.137053  |
| 1  | 2.511243  | -1.148910 | 2.265874  |
| 1  | 0.665574  | 3.683068  | -1.309477 |
| 1  | -0.457433 | 4.948629  | -0.765794 |
| 1  | -2.893567 | 3.942611  | -2.008918 |
| 1  | -2.812374 | 4.375697  | -0.289774 |



|   |           |           |           |
|---|-----------|-----------|-----------|
| 6 | 0.892135  | -2.869300 | -2.606944 |
| 6 | 1.720760  | -3.347923 | -1.658097 |
| 1 | 1.249543  | -2.215288 | -3.398885 |
| 1 | -0.154370 | -3.161550 | -2.648449 |
| 1 | 1.379839  | -4.076565 | -0.923013 |
| 1 | 2.786647  | -3.121766 | -1.669404 |

**4TS1**                    **HF = -1001.8234872 hartree**                     $v^{\ddagger} = -329.4650 \text{ icm}^{-1}$

|    |           |           |           |
|----|-----------|-----------|-----------|
| 40 | 1.055419  | -0.912806 | -0.380892 |
| 7  | -1.712263 | 2.950225  | -0.747527 |
| 5  | -1.163736 | 1.717934  | -0.418823 |
| 5  | -1.653667 | -0.976853 | -0.929594 |
| 1  | -0.887444 | -0.847641 | -1.858943 |
| 5  | -1.485423 | -2.342434 | 0.160644  |
| 1  | -0.599734 | -3.112451 | -0.110363 |
| 5  | -1.662773 | -1.742329 | 1.805400  |
| 1  | -0.963196 | -2.147231 | 2.673979  |
| 5  | -1.944230 | 0.018812  | 1.699118  |
| 1  | -1.484726 | 0.808864  | 2.449557  |
| 5  | -3.302815 | -0.342378 | -0.830512 |
| 1  | -3.757935 | 0.233112  | -1.759837 |
| 5  | -2.992748 | -2.110329 | -0.748755 |
| 1  | -3.310551 | -2.827576 | -1.637828 |
| 5  | -3.022875 | -2.587633 | 0.995422  |
| 1  | -3.376660 | -3.662338 | 1.348692  |
| 5  | -3.307688 | -1.102247 | 1.964526  |
| 1  | -3.878985 | -1.104954 | 3.003163  |
| 5  | -3.489241 | 0.260841  | 0.836403  |
| 1  | -4.105735 | 1.241576  | 1.072628  |
| 5  | -4.137870 | -1.337036 | 0.387485  |
| 1  | -5.307942 | -1.515341 | 0.315914  |
| 6  | -0.953606 | -0.792837 | 0.589119  |
| 6  | -2.001069 | 0.404739  | 0.020284  |
| 6  | -3.139558 | 3.285424  | -0.821473 |
| 1  | -3.762724 | 2.403328  | -0.712747 |
| 6  | -0.886975 | 4.122772  | -1.068467 |
| 1  | -1.087702 | 4.458908  | -2.092864 |
| 6  | 0.407741  | 1.472468  | -0.544913 |
| 6  | 1.066011  | 1.145049  | -1.774517 |
| 1  | 0.575751  | 1.083558  | -2.740243 |
| 6  | 2.431698  | 0.839871  | -1.546611 |
| 1  | 3.160991  | 0.574797  | -2.302695 |
| 6  | 3.901355  | 1.020270  | 0.612491  |
| 1  | 4.844965  | 0.768285  | 0.136938  |
| 6  | 3.838791  | 1.324514  | 1.951573  |
| 1  | 4.743410  | 1.307310  | 2.551685  |
| 6  | 2.604190  | 1.683044  | 2.573700  |
| 1  | 2.602651  | 1.922752  | 3.632735  |
| 6  | 1.427772  | 1.750982  | 1.861984  |
| 1  | 0.502692  | 2.046932  | 2.345070  |
| 6  | 1.449594  | 1.467971  | 0.464326  |
| 6  | 2.702054  | 1.081203  | -0.158557 |
| 6  | 2.534065  | -2.228169 | 0.763912  |
| 1  | 1.851557  | -2.962398 | 1.213689  |
| 1  | 3.560856  | -2.556387 | 0.916830  |
| 1  | 2.469562  | -1.270623 | 1.349286  |
| 1  | 0.173816  | 3.894220  | -0.970918 |

|   |           |           |           |
|---|-----------|-----------|-----------|
| 1 | -1.133754 | 4.946376  | -0.388053 |
| 1 | -3.353727 | 3.746484  | -1.792631 |
| 1 | -3.401585 | 4.006163  | -0.037715 |
| 6 | 1.592516  | -2.373425 | -2.138716 |
| 6 | 2.636822  | -2.835730 | -1.302297 |
| 1 | 1.860792  | -1.731621 | -2.975888 |
| 1 | 0.749050  | -3.039140 | -2.315756 |
| 1 | 2.589722  | -3.840703 | -0.894406 |
| 1 | 3.642577  | -2.454197 | -1.448505 |

INT7

HF = -1001.8533156 hartree

|    |           |           |           |
|----|-----------|-----------|-----------|
| 40 | 0.977611  | -0.879808 | -0.187371 |
| 7  | -1.538725 | 3.079626  | -0.149356 |
| 5  | -1.133412 | 1.758926  | -0.297384 |
| 5  | -2.511136 | -0.463391 | -1.393502 |
| 1  | -2.287855 | -0.019288 | -2.467867 |
| 5  | -2.291448 | -2.184975 | -0.955982 |
| 1  | -1.898844 | -2.929530 | -1.790950 |
| 5  | -1.623341 | -2.228876 | 0.677888  |
| 1  | -0.727097 | -2.979110 | 0.948814  |
| 5  | -1.440323 | -0.562935 | 1.226885  |
| 1  | -0.448536 | -0.199458 | 1.810912  |
| 5  | -3.719706 | 0.225337  | -0.270839 |
| 1  | -4.360865 | 1.144008  | -0.650254 |
| 5  | -3.901696 | -1.443741 | -0.859402 |
| 1  | -4.759345 | -1.724506 | -1.627803 |
| 5  | -3.348589 | -2.549344 | 0.444775  |
| 1  | -3.801904 | -3.633126 | 0.602257  |
| 5  | -2.785471 | -1.534572 | 1.827348  |
| 1  | -2.824656 | -1.878311 | 2.961506  |
| 5  | -3.038070 | 0.179619  | 1.373046  |
| 1  | -3.178984 | 1.071373  | 2.138600  |
| 5  | -4.216282 | -1.053134 | 0.865653  |
| 1  | -5.309384 | -1.061465 | 1.325010  |
| 6  | -1.233201 | -0.981448 | -0.406524 |
| 6  | -2.052480 | 0.458237  | -0.010538 |
| 6  | -2.851098 | 3.555366  | 0.305797  |
| 1  | -3.488873 | 2.734963  | 0.617455  |
| 6  | -0.672345 | 4.215637  | -0.494046 |
| 1  | -1.156558 | 4.829918  | -1.262266 |
| 6  | 0.353402  | 1.408793  | -0.748465 |
| 6  | 0.735708  | 0.799841  | -1.986943 |
| 1  | 0.051708  | 0.571370  | -2.796056 |
| 6  | 2.109636  | 0.457597  | -1.978969 |
| 1  | 2.659736  | 0.004010  | -2.792070 |
| 6  | 3.976053  | 0.872434  | -0.187906 |
| 1  | 4.797253  | 0.473402  | -0.776118 |
| 6  | 4.182449  | 1.362379  | 1.083250  |
| 1  | 5.180245  | 1.349071  | 1.510912  |
| 6  | 3.107424  | 1.891566  | 1.856164  |
| 1  | 3.312275  | 2.260491  | 2.856667  |
| 6  | 1.822993  | 1.964005  | 1.354645  |
| 1  | 1.018529  | 2.393999  | 1.944326  |
| 6  | 1.575020  | 1.517796  | 0.022282  |
| 6  | 2.662387  | 0.928984  | -0.738952 |
| 6  | 2.549304  | -2.425243 | 1.435797  |
| 1  | 1.540732  | -2.730566 | 1.759995  |

|   |           |           |           |
|---|-----------|-----------|-----------|
| 1 | 3.223929  | -2.819104 | 2.202518  |
| 1 | 2.674487  | -1.325944 | 1.555951  |
| 1 | 0.289548  | 3.875516  | -0.875804 |
| 1 | -0.506418 | 4.847062  | 0.387208  |
| 1 | -3.349595 | 4.105565  | -0.500940 |
| 1 | -2.719392 | 4.239595  | 1.152327  |
| 6 | 1.990788  | -2.576716 | -1.129363 |
| 6 | 2.944430  | -2.969331 | 0.033193  |
| 1 | 2.489277  | -2.607655 | -2.098142 |
| 1 | 1.133580  | -3.278671 | -1.173261 |
| 1 | 3.003532  | -4.060853 | 0.118934  |
| 1 | 3.954637  | -2.611778 | -0.190478 |

**VIII**

**HF = -1080.4651131 hartree**

|    |           |           |           |
|----|-----------|-----------|-----------|
| 40 | 0.981594  | -0.687724 | 0.011300  |
| 7  | -2.230476 | 2.765159  | -0.813590 |
| 5  | -1.594141 | 1.543351  | -0.632098 |
| 5  | -2.414965 | -1.059216 | -1.353159 |
| 1  | -2.134107 | -0.787647 | -2.471330 |
| 5  | -1.951999 | -2.584094 | -0.548480 |
| 1  | -1.325360 | -3.375805 | -1.170332 |
| 5  | -1.490941 | -2.182077 | 1.106836  |
| 1  | -0.511891 | -2.679085 | 1.595667  |
| 5  | -1.685879 | -0.436629 | 1.321535  |
| 1  | -0.880711 | 0.229437  | 1.903815  |
| 5  | -3.860673 | -0.432011 | -0.513023 |
| 1  | -4.602553 | 0.252805  | -1.129746 |
| 5  | -3.664197 | -2.183195 | -0.754958 |
| 1  | -4.349155 | -2.771633 | -1.523003 |
| 5  | -3.087680 | -2.888543 | 0.794989  |
| 1  | -3.352993 | -3.993099 | 1.134336  |
| 5  | -2.899082 | -1.540493 | 1.979143  |
| 1  | -3.024894 | -1.669696 | 3.151662  |
| 5  | -3.402722 | -0.031911 | 1.157327  |
| 1  | -3.804503 | 0.939815  | 1.702042  |
| 5  | -4.260718 | -1.549941 | 0.814886  |
| 1  | -5.383253 | -1.695675 | 1.168712  |
| 6  | -1.204593 | -1.105187 | -0.164505 |
| 6  | -2.305716 | 0.174599  | -0.155254 |
| 6  | -3.651170 | 3.058000  | -0.588763 |
| 1  | -4.173580 | 2.203904  | -0.170569 |
| 6  | -1.530947 | 3.956910  | -1.312656 |
| 1  | -2.007322 | 4.306936  | -2.236125 |
| 6  | -0.022849 | 1.408764  | -0.857174 |
| 6  | 0.640427  | 0.772759  | -1.952639 |
| 1  | 0.134728  | 0.319819  | -2.798238 |
| 6  | 2.041898  | 0.736691  | -1.742798 |
| 1  | 2.779424  | 0.338490  | -2.425668 |
| 6  | 3.521200  | 1.788365  | 0.146094  |
| 1  | 4.480088  | 1.511229  | -0.282808 |
| 6  | 3.448827  | 2.520095  | 1.311474  |
| 1  | 4.362348  | 2.818245  | 1.817289  |
| 6  | 2.194097  | 2.918298  | 1.861990  |
| 1  | 2.185322  | 3.508249  | 2.773846  |
| 6  | 1.003111  | 2.593156  | 1.248870  |
| 1  | 0.054402  | 2.922667  | 1.662821  |
| 6  | 1.033662  | 1.864860  | 0.022465  |

|   |           |           |           |
|---|-----------|-----------|-----------|
| 6 | 2.310597  | 1.449334  | -0.525082 |
| 6 | 1.873014  | -2.323224 | -1.118560 |
| 1 | 1.813926  | -3.058204 | -0.278403 |
| 1 | 0.968999  | -2.533792 | -1.730785 |
| 1 | -0.483977 | 3.740195  | -1.521975 |
| 1 | -1.588847 | 4.767360  | -0.575905 |
| 1 | -4.129992 | 3.338773  | -1.534332 |
| 1 | -3.746498 | 3.902590  | 0.103980  |
| 6 | 1.633980  | -0.689977 | 2.902367  |
| 6 | 2.670781  | -1.162154 | 2.181147  |
| 1 | 1.562376  | 0.362703  | 3.162719  |
| 1 | 0.861967  | -1.348597 | 3.293112  |
| 1 | 2.789288  | -2.227158 | 1.987042  |
| 1 | 3.481523  | -0.509242 | 1.865933  |
| 6 | 3.137758  | -2.562434 | -1.942732 |
| 1 | 3.134650  | -3.589485 | -2.333010 |
| 1 | 3.118077  | -1.911657 | -2.826630 |
| 6 | 4.434322  | -2.333355 | -1.158561 |
| 1 | 4.509697  | -1.297996 | -0.799813 |
| 1 | 4.495377  | -2.998420 | -0.287945 |
| 1 | 5.311627  | -2.532398 | -1.782326 |

**4TS2**

**HF = -1080.4526326 hartree**

$\nu^* = -254.2536 \text{ cm}^{-1}$

|    |           |           |           |
|----|-----------|-----------|-----------|
| 40 | 1.031518  | -0.319498 | -0.071114 |
| 7  | -2.922769 | 2.235852  | -0.687232 |
| 5  | -1.991119 | 1.210078  | -0.578457 |
| 5  | -2.260183 | -1.518336 | -1.332754 |
| 1  | -2.163543 | -1.180770 | -2.464233 |
| 5  | -1.392284 | -2.912507 | -0.626527 |
| 1  | -0.674574 | -3.538767 | -1.334911 |
| 5  | -0.874053 | -2.443254 | 0.992207  |
| 1  | 0.235721  | -2.694368 | 1.379409  |
| 5  | -1.417793 | -0.789907 | 1.262974  |
| 1  | -0.684834 | 0.026858  | 1.765102  |
| 5  | -3.717433 | -1.242226 | -0.335004 |
| 1  | -4.653690 | -0.741848 | -0.856186 |
| 5  | -3.164000 | -2.899642 | -0.650875 |
| 1  | -3.782220 | -3.617531 | -1.363503 |
| 5  | -2.295352 | -3.478780 | 0.812302  |
| 1  | -2.279324 | -4.618540 | 1.138556  |
| 5  | -2.287860 | -2.132939 | 2.018288  |
| 1  | -2.260965 | -2.296444 | 3.192521  |
| 5  | -3.188536 | -0.761791 | 1.298689  |
| 1  | -3.737006 | 0.091495  | 1.909963  |
| 5  | -3.723968 | -2.431312 | 0.991903  |
| 1  | -4.746983 | -2.824482 | 1.444867  |
| 6  | -0.955352 | -1.316619 | -0.270037 |
| 6  | -2.314672 | -0.303930 | -0.110886 |
| 6  | -4.357309 | 2.162526  | -0.384341 |
| 1  | -4.622090 | 1.213707  | 0.070351  |
| 6  | -2.569283 | 3.574655  | -1.179530 |
| 1  | -3.174799 | 3.816754  | -2.061031 |
| 6  | -0.447853 | 1.498050  | -0.856236 |
| 6  | 0.329042  | 1.080667  | -1.973085 |
| 1  | -0.062773 | 0.538973  | -2.827281 |
| 6  | 1.706191  | 1.388672  | -1.767496 |
| 1  | 2.506871  | 1.224094  | -2.478764 |

|   |           |           |           |
|---|-----------|-----------|-----------|
| 6 | 2.892844  | 2.781354  | 0.104632  |
| 1 | 3.882223  | 2.775016  | -0.344085 |
| 6 | 2.652255  | 3.453707  | 1.283442  |
| 1 | 3.464696  | 3.976607  | 1.779180  |
| 6 | 1.350761  | 3.494572  | 1.864568  |
| 1 | 1.206488  | 4.042137  | 2.790971  |
| 6 | 0.277686  | 2.871575  | 1.265859  |
| 1 | -0.714700 | 2.924554  | 1.703986  |
| 6 | 0.478904  | 2.190895  | 0.030626  |
| 6 | 1.804362  | 2.139780  | -0.547388 |
| 6 | 2.679997  | -1.731012 | -0.752828 |
| 1 | 2.133563  | -2.631737 | -0.420960 |
| 1 | 2.094961  | -1.289574 | -1.620070 |
| 1 | -1.516824 | 3.627727  | -1.455800 |
| 1 | -2.776585 | 4.328801  | -0.410638 |
| 1 | -4.942883 | 2.292425  | -1.302227 |
| 1 | -4.625386 | 2.970060  | 0.306999  |
| 6 | 2.250336  | -0.183866 | 1.931696  |
| 6 | 3.254576  | -0.864198 | 1.214063  |
| 1 | 2.367162  | 0.883648  | 2.106951  |
| 1 | 1.700112  | -0.733494 | 2.694590  |
| 1 | 3.480565  | -1.893791 | 1.466637  |
| 1 | 4.076986  | -0.305095 | 0.777072  |
| 6 | 4.048780  | -2.093593 | -1.330646 |
| 1 | 3.887206  | -2.449468 | -2.357537 |
| 1 | 4.656776  | -1.184028 | -1.424191 |
| 6 | 4.820010  | -3.178544 | -0.566618 |
| 1 | 5.153719  | -2.847197 | 0.421166  |
| 1 | 4.211741  | -4.081513 | -0.439710 |
| 1 | 5.714290  | -3.460305 | -1.130534 |

**INT8**

**HF = -1080.4802639 hartree**

|    |           |           |           |
|----|-----------|-----------|-----------|
| 40 | 1.021283  | -0.133727 | -0.230854 |
| 7  | -3.324834 | 1.771173  | -0.980970 |
| 5  | -2.261699 | 0.966423  | -0.596345 |
| 5  | -1.431666 | -1.653354 | -1.030487 |
| 1  | -0.902105 | -1.246478 | -2.020852 |
| 5  | -0.576578 | -2.677687 | 0.126287  |
| 1  | 0.567937  | -2.940294 | -0.148452 |
| 5  | -0.993170 | -2.156886 | 1.759704  |
| 1  | -0.161438 | -2.113447 | 2.604734  |
| 5  | -2.106462 | -0.770455 | 1.601483  |
| 1  | -2.068805 | 0.190778  | 2.289389  |
| 5  | -3.173178 | -1.900035 | -0.834763 |
| 1  | -3.880458 | -1.677017 | -1.758230 |
| 5  | -2.032059 | -3.276796 | -0.701198 |
| 1  | -1.979728 | -4.114679 | -1.538716 |
| 5  | -1.776147 | -3.599453 | 1.055787  |
| 1  | -1.544524 | -4.686259 | 1.469067  |
| 5  | -2.734636 | -2.391666 | 1.981769  |
| 1  | -3.199953 | -2.608655 | 3.050359  |
| 5  | -3.588618 | -1.361090 | 0.805152  |
| 1  | -4.599350 | -0.788286 | 1.027401  |
| 5  | -3.379592 | -3.096848 | 0.463597  |
| 1  | -4.309704 | -3.832543 | 0.460059  |
| 6  | -0.877456 | -1.050222 | 0.468581  |
| 6  | -2.370513 | -0.562332 | -0.091995 |

|   |           |           |           |
|---|-----------|-----------|-----------|
| 6 | -4.735414 | 1.371902  | -1.053112 |
| 1 | -4.858488 | 0.311437  | -0.855624 |
| 6 | -3.157040 | 3.174524  | -1.379272 |
| 1 | -3.483993 | 3.315097  | -2.416616 |
| 6 | -0.757708 | 1.501002  | -0.690870 |
| 6 | 0.039718  | 1.432923  | -1.872851 |
| 1 | -0.291977 | 1.012443  | -2.816268 |
| 6 | 1.355975  | 1.900683  | -1.621857 |
| 1 | 2.150826  | 1.986654  | -2.354209 |
| 6 | 2.367834  | 3.126971  | 0.456483  |
| 1 | 3.324940  | 3.365842  | 0.001649  |
| 6 | 2.073990  | 3.522467  | 1.744538  |
| 1 | 2.808932  | 4.079393  | 2.317849  |
| 6 | 0.817852  | 3.221815  | 2.340663  |
| 1 | 0.628059  | 3.548338  | 3.358684  |
| 6 | -0.166791 | 2.544761  | 1.650223  |
| 1 | -1.129845 | 2.346305  | 2.108631  |
| 6 | 0.079865  | 2.161801  | 0.302847  |
| 6 | 1.375473  | 2.433414  | -0.282738 |
| 6 | 3.445927  | -1.280883 | -0.723284 |
| 1 | 2.865364  | -2.188834 | -0.482723 |
| 1 | 2.888918  | -0.707764 | -1.513967 |
| 1 | -2.116448 | 3.485379  | -1.290649 |
| 1 | -3.773189 | 3.818785  | -0.740772 |
| 1 | -5.125162 | 1.589701  | -2.054329 |
| 1 | -5.327155 | 1.940665  | -0.325959 |
| 6 | 2.449211  | -0.068573 | 1.406001  |
| 6 | 3.700207  | -0.428812 | 0.556335  |
| 1 | 2.627614  | 0.775751  | 2.071846  |
| 1 | 2.122893  | -0.936773 | 2.008247  |
| 1 | 4.395862  | -1.004750 | 1.177961  |
| 1 | 4.221827  | 0.488359  | 0.259776  |
| 6 | 4.737309  | -1.727020 | -1.450948 |
| 1 | 4.454234  | -2.159227 | -2.417525 |
| 1 | 5.337506  | -0.834777 | -1.669468 |
| 6 | 5.568264  | -2.746756 | -0.664821 |
| 1 | 5.948550  | -2.339381 | 0.277487  |
| 1 | 4.985280  | -3.647132 | -0.438123 |
| 1 | 6.434901  | -3.054498 | -1.258170 |
